# Supplementary material for: Insights Into an Unexplored Component of the Mosquito Repeatome: Distribution and Variability of Viral Sequences Integrated Into the Genome of the Arboviral Vector Aedes albopictus
Source: Front Genet. 2019 Feb 12;10:93. doi: 10.3389/fgene.2019.00093 (PMC6379468; doi:10.3389/fgene.2019.00093)
Supplement: Supplementary file 2 [file Table_1.xlsx]

## Sheet: Sheet1
Supplemental table 1
GroupID	Species	OrthoDB_ID	Public_ID	#Singlecopy	#Multicopy	#Present	#TotalSpecies	#TotalGenes	EvolutionaryRate	Uniprot_ID	Description
EOG09160396	Aedes aegypti	7159:002d44	AAEL012101	9	0	9	27	9	0.6099	Q16N35	Function:Tubulin is the major constituent of microtubules. It binds two moles of GTP, one at an exchangeable site on the beta chain and one at a non-exchangeable site on the alpha chain.
EOG09160FQN	Aedes aegypti	7159:0000e7	AAEL000253	2	1	3	27	4	0.612	Q17PV3	Similarity:Belongs to the peptidase S1 family.
EOG09160FQN	Aedes aegypti	7159:002fd8	AAEL012799	2	1	3	27	4	0.612	Q16L16	Similarity:Belongs to the peptidase S1 family.
EOG09160FWT	Aedes aegypti	7159:0021cc	AAEL009037	2	0	2	27	2	0.6494	Q16X11	GTP-binding protein (i) alpha subunit, gnai
EOG09160C5T	Aedes aegypti	7159:00373c	AAEL014831	18	0	18	27	18	0.6506	Q1HRB0	RNA polymerase II subunit Rpb10, putative
EOG091609CD	Aedes aegypti	7159:002b8f	AAEL011643	5	0	5	27	5	0.6523	Q16PH1	homothorax homeobox protein
EOG09160AG2	Aedes aegypti	7159:0005d1	AAEL001578	5	0	5	27	5	0.6622	Q17KW4	Transmembrane:Helical
EOG09160B6L	Aedes aegypti	7159:0028e1	AAEL010922	3	1	4	27	5	0.6655	Q16RK5	Dipeptidase
EOG091609TJ	Aedes aegypti	7159:001bf3	AAEL007477	3	0	3	27	3	0.6668	Q172A4	SUMO-conjugating enzyme
EOG091607ZA	Aedes aegypti	7159:000a5a	AAEL002761	4	0	4	27	4	0.6675	Q17H71	tropomyosin invertebrate
EOG09160BYQ	Aedes aegypti	7159:000278	AAEL000679	14	0	14	27	14	0.6737	Q17NI5	NEDD8, putative
EOG091609K8	Aedes aegypti	7159:0035b1	AAEL014375	25	0	25	27	25	0.6749	Q1HRK8	clathrin coat assembly protein ap17
EOG091606KZ	Aedes aegypti	7159:00245d	AAEL009723	10	1	11	27	12	0.6755	Q16V19	Similarity:Contains fibrinogen C-terminal domain.
EOG091608U4	Aedes aegypti	7159:003305	AAEL013633	11	5	16	27	21	0.676	Q16IK4	Similarity:Belongs to the ubiquitin-conjugating enzyme family.
EOG091608U4	Aedes aegypti	7159:003bf1	AAEL017518	11	5	16	27	21	0.676	NA	NA
EOG09160FLG	Aedes aegypti	7159:002dba	AAEL012221	3	0	3	27	3	0.6763	Q16MR6	Transmembrane:Helical
EOG09160AQJ	Aedes aegypti	7159:00240b	AAEL009639	8	0	8	27	8	0.6798	Q16V89	Membrane-anchored ubiquitin-fold protein
EOG09160B6R	Aedes aegypti	7159:0039ca	AAEL015674	13	10	23	27	74	0.6826	Q17EF1	Histone H2B
EOG09160B6R	Aedes aegypti	7159:0039cb	AAEL015675	13	10	23	27	74	0.6826	Q17EF1	Histone H2B
EOG09160B6R	Aedes aegypti	7159:0039cc	AAEL015676	13	10	23	27	74	0.6826	Q17EF1	Histone H2B
EOG09160B6R	Aedes aegypti	7159:0039cd	AAEL015677	13	10	23	27	74	0.6826	Q17EF1	Histone H2B
EOG09160B6R	Aedes aegypti	7159:0039ce	AAEL015678	13	10	23	27	74	0.6826	Q17EF1	Histone H2B
EOG09160B6R	Aedes aegypti	7159:0039cf	AAEL015679	13	10	23	27	74	0.6826	Q17EF1	Histone H2B
EOG09160B6R	Aedes aegypti	7159:0039d0	AAEL015680	13	10	23	27	74	0.6826	Q17EF1	Histone H2B
EOG09160B6R	Aedes aegypti	7159:0039d1	AAEL015681	13	10	23	27	74	0.6826	Q17EF1	Histone H2B
EOG09160B6R	Aedes aegypti	7159:0039d2	AAEL015682	13	10	23	27	74	0.6826	Q17ER2	Histone H2B
EOG09160B6R	Aedes aegypti	7159:0039d3	AAEL015683	13	10	23	27	74	0.6826	Q17ER9	Histone H2B
EOG09160B6R	Aedes aegypti	7159:0039d4	AAEL015684	13	10	23	27	74	0.6826	Q17ER9	Histone H2B
EOG09160B08	Aedes aegypti	7159:002514	AAEL009914	18	1	19	27	20	0.6833	Q16UH6	small nuclear ribonucleoprotein sm d2
EOG09160CLA	Aedes aegypti	7159:00243a	AAEL009688	5	0	5	27	5	0.6839	Q16V61	NA
EOG09160B4X	Aedes aegypti	7159:001c73	AAEL007609	22	1	23	27	24	0.6855	Q171J5	Histone H2A
EOG09160B4X	Aedes aegypti	7159:0038f2	AAEL015390	22	1	23	27	24	0.6855	Q1DH02	Histone H2A
EOG091603EU	Aedes aegypti	7159:000ba7	AAEL003106	26	0	26	27	26	0.6872	Q17GE1	Similarity:Contains MHD (mu homology) domain.
EOG09160ACL	Aedes aegypti	7159:000dd5	AAEL003695	24	0	24	27	24	0.6872	Q17EU3	PHF5-like
EOG09160GR8	Aedes aegypti	7159:003422	AAEL013959	3	0	3	27	3	0.6872	Q16HP3	NA
EOG09160FQF	Aedes aegypti	7159:002b7d	AAEL011625	2	0	2	27	2	0.6874	Q16PI9	Similarity:Contains 1 SH3 domain.
EOG09160BEK	Aedes aegypti	7159:002af5	AAEL011478	19	0	19	27	19	0.6876	Q16PZ7	cytoplasmic dynein light chain
EOG09160844	Aedes aegypti	7159:0022df	AAEL009327	22	0	22	27	22	0.6881	Q16W66	EF-Hand 1, calcium-binding site
EOG09160GQ1	Aedes aegypti	7159:00281e	AAEL010711	3	0	3	27	3	0.6885	Q16S46	eph receptor tyrosine kinase
EOG091603HN	Aedes aegypti	7159:0018da	AAEL006642	11	10	21	27	35	0.6887	Q1HR53	Function:Tubulin is the major constituent of microtubules. It binds two moles of GTP, one at an exchangeable site on the beta chain and one at a non-exchangeable site on the alpha chain (By similarity).
EOG091603HN	Aedes aegypti	7159:003178	AAEL013229	11	10	21	27	35	0.6887	Q16JS3	Function:Tubulin is the major constituent of microtubules. It binds two moles of GTP, one at an exchangeable site on the beta chain and one at a non-exchangeable site on the alpha chain.
EOG091603YL	Aedes aegypti	7159:0035d6	AAEL014414	22	1	23	27	24	0.6891	Q16GE2	Similarity:Belongs to the DEAD box helicase family.
EOG091608ZV	Aedes aegypti	7159:001e54	AAEL008111	15	1	16	27	17	0.6898	Q0IES1	Immunoglobulin I-set
EOG091609FI	Aedes aegypti	7159:000ed6	AAEL003957	24	1	25	27	26	0.6901	Q1HQF5	Similarity:Contains ADF-H domain.
EOG09160C8B	Aedes aegypti	7159:0005a2	AAEL001531	19	1	20	27	22	0.6901	Q17KY6	Zinc finger, CCCH-type
EOG091600U6	Aedes aegypti	7159:0015b4	VATB	25	2	27	27	29	0.6914	Q9XYC8	Similarity:Belongs to the ATPase alpha/beta chains family.
EOG09160AD4	Aedes aegypti	7159:001ac6	AAEL007162	24	0	24	27	24	0.6923	Q173G7	Similarity:Belongs to the ATG8 family.
EOG091602ZD	Aedes aegypti	7159:0010ed	AAEL004523	24	2	26	27	28	0.6927	Q17CM3	Similarity:Belongs to the SecY/SEC61-alpha family.
EOG091602ZD	Aedes aegypti	7159:002823	AAEL010716	24	2	26	27	28	0.6927	Q16S36	Similarity:Belongs to the SecY/SEC61-alpha family.
EOG09160469	Aedes aegypti	7159:000630	AAEL001673	8	16	24	27	62	0.6927	Q17KG3	Similarity:Belongs to the actin family.
EOG09160469	Aedes aegypti	7159:000727	ACT-1	8	16	24	27	62	0.6927	P49128	Actin-1
EOG09160469	Aedes aegypti	7159:001157	AAEL004631	8	16	24	27	62	0.6927	Q17C87	Similarity:Belongs to the actin family.
EOG09160469	Aedes aegypti	7159:00164f	AAEL005961	8	16	24	27	62	0.6927	Q178A9	Similarity:Belongs to the actin family.
EOG09160469	Aedes aegypti	7159:0029e5	AAEL011197	8	16	24	27	62	0.6927	Q16QR7	Similarity:Belongs to the actin family.
EOG091608HM	Aedes aegypti	7159:000ba4	AAEL003103	18	1	19	27	20	0.6927	Q1HR02	Similarity:Belongs to the ubiquitin-conjugating enzyme family.
EOG091608LB	Aedes aegypti	7159:0012e3	AAEL005038	18	1	19	27	20	0.6933	Q17BA8	Similarity:Belongs to the ubiquitin-conjugating enzyme family.
EOG091602HH	Aedes aegypti	7159:002d3e	AAEL012095	12	7	19	27	27	0.6942	Q1HQY1	Similarity:Belongs to the AAA ATPase family.
EOG091609WQ	Aedes aegypti	7159:0005a3	AAEL001532	26	0	26	27	26	0.6943	Q17KZ6	Protein yippee-like
EOG091608DA	Aedes aegypti	7159:001a6d	AAEL007065	26	0	26	27	26	0.6946	Q1HR73	Similarity:Belongs to the small GTPase superfamily. Arf family.
EOG0916052B	Aedes aegypti	7159:0030de	AAEL013068	27	0	27	27	27	0.6958	Q16K96	Serine/threonine-protein phosphatase
EOG091607RR	Aedes aegypti	7159:0022d5	AAEL009317	19	0	19	27	19	0.6966	Q1HQR4	Similarity:Belongs to the small GTPase superfamily. Rab family.
EOG09160BT4	Aedes aegypti	7159:003809	AAEL015064	3	0	3	27	3	0.6978	Q16EQ2	Rad60/SUMO-like domain
EOG091607BI	Aedes aegypti	7159:002054	AAEL008641	25	0	25	27	25	0.698	Q16Y75	GTP-binding protein (o) alpha subunit, gnao
EOG091607A9	Aedes aegypti	7159:002595	AAEL010046	24	1	25	27	26	0.6985	Q16U21	maintenance of ploidy protein mob1 (mps1 binder 1)
EOG091608TM	Aedes aegypti	7159:002732	AAEL010470	26	0	26	27	26	0.6987	Q16SV8	calcineurin b subunit
EOG09160CKY	Aedes aegypti	7159:00147d	AAEL005471	22	0	22	27	22	0.6989	Q1HRQ1	Transmembrane:Helical
EOG09160BVO	Aedes aegypti	7159:003a96	AAEL017161	19	1	20	27	21	0.6996	NA	NA
EOG0916085Z	Aedes aegypti	7159:00125e	AAEL004902	21	0	21	27	21	0.6998	Q17BP4	Similarity:Belongs to the small GTPase superfamily. Rab family.
EOG091609E3	Aedes aegypti	7159:002724	AAEL010453	24	1	25	27	26	0.6998	Q16PS8	mago nashi, putative
EOG091609E3	Aedes aegypti	7159:002b37	AAEL011544	24	1	25	27	26	0.6998	Q16PS8	mago nashi, putative
EOG0916056B	Aedes aegypti	7159:000f27	AAEL004040	25	0	25	27	25	0.7001	Q17DV3	Serine/threonine-protein phosphatase
EOG091608OB	Aedes aegypti	7159:00161d	AAEL005910	7	0	7	27	7	0.7001	Q0IFB0	programmed cell death protein
EOG091609UU	Aedes aegypti	7159:00010d	AAEL000291	22	2	24	27	28	0.7008	O16110	Vacuolar proton pump 16 kDa proteolipid subunit
EOG091608SO	Aedes aegypti	7159:001226	AAEL004846	26	0	26	27	26	0.7012	Q0IFH1	Similarity:Contains 1 PDZ (DHR) domain.
EOG091607BZ	Aedes aegypti	7159:003392	AAEL013795	27	0	27	27	27	0.702	Q16I53	spliceosome associated protein
EOG091605PX	Aedes aegypti	7159:001a54	AAEL007040	6	0	6	27	6	0.7021	Q173S1	lozenge
EOG09160C10	Aedes aegypti	7159:0005af	AAEL001544	18	1	19	27	20	0.7027	Q1DGI7	NA
EOG09160C10	Aedes aegypti	7159:003998	AAEL015617	18	1	19	27	20	0.7027	Q1DGI7	NA
EOG09160BDG	Aedes aegypti	7159:000502	AAEL001363	20	0	20	27	20	0.7032	Q17LD2	small nuclear ribonucleoprotein Sm D1, putative
EOG09160AF9	Aedes aegypti	7159:00116d	AAEL004653	23	3	26	27	30	0.7036	Q17C74	elongation factor SIII p15 subunit, putative
EOG091609NJ	Aedes aegypti	7159:00230e	AAEL009377	26	1	27	27	28	0.7037	Q16W03	rap1 and
EOG09160BCX	Aedes aegypti	7159:00140f	AAEL005354	22	0	22	27	22	0.7038	Q17AA0	dynein light chain, putative
EOG09160B4N	Aedes aegypti	7159:002885	AAEL010819	12	0	12	27	12	0.7043	Q0IEF0	Transmembrane:Helical
EOG091603VL	Aedes aegypti	7159:0014a6	AAEL005512	26	0	26	27	26	0.7044	Q179U2	Similarity:Contains 1 BTB (POZ) domain.
EOG091604M2	Aedes aegypti	7159:0029c8	AAEL011168	23	1	24	27	25	0.705	Q16QU9	GTP-binding protein (i) alpha subunit, gnai
EOG0916085Q	Aedes aegypti	7159:002871	AAEL010798	26	0	26	27	26	0.7057	Q16RW0	Similarity:Belongs to the ubiquitin-conjugating enzyme family.
EOG09160BTQ	Aedes aegypti	7159:001008	AAEL004283	18	0	18	27	18	0.7057	Q17DA5	Zinc finger, C2H2
EOG091608SX	Aedes aegypti	7159:002aee	RpL17	13	0	13	27	13	0.7062	Q1HR65	60S ribosomal protein L17
EOG09160B3W	Aedes aegypti	7159:002ac9	AAEL011433	24	0	24	27	24	0.7063	Q16Q31	small nuclear ribonucleoprotein sm d3
EOG091609GI	Aedes aegypti	7159:000d68	AAEL003582	27	0	27	27	27	0.7067	Q5QC94	ribosomal protein S15p/S13e
EOG091603S4	Aedes aegypti	7159:001aa3	AAEL007124	25	2	27	27	29	0.7071	Q173K2	Similarity:Contains MHD (mu homology) domain.
EOG091603S4	Aedes aegypti	7159:002817	AAEL010704	25	2	27	27	29	0.7071	Q16S47	Similarity:Contains MHD (mu homology) domain.
EOG0916093C	Aedes aegypti	7159:0021cf	AAEL009041	26	0	26	27	26	0.7072	Q16WZ0	arp2/3 complex 20 kd subunit
EOG091600VF	Aedes aegypti	7159:002e6e	AGO1a_b	24	2	26	27	28	0.7073	Q16M62	Protein argonaute
EOG091600VF	Aedes aegypti	7159:003887	AGO1a_a	24	2	26	27	28	0.7073	Q16EE2	Protein argonaute
EOG09160BVC	Aedes aegypti	7159:001764	AAEL006251	23	0	23	27	23	0.7073	Q176V0	Ubiquitin-fold modifier 1
EOG091607B7	Aedes aegypti	7159:002f6f	AAEL012686	26	1	27	27	28	0.7079	Q1HRM5	Similarity:Belongs to the ribosomal protein S12P family.
EOG091609B4	Aedes aegypti	7159:001bcd	AAEL007439	24	0	24	27	24	0.7082	Q172D1	myosin light chain 1,
EOG091601TR	Aedes aegypti	7159:0020e1	VhaA	27	0	27	27	27	0.7086	O16109	Vacuolar proton pump subunit alpha
EOG09160BGD	Aedes aegypti	7159:000d4c	AAEL003552	21	0	21	27	21	0.709	Q17F62	DNA-directed RNA polymerase subunit rpb6
EOG091609PH	Aedes aegypti	7159:00170f	AAEL006160	20	0	20	27	20	0.7091	Q177E8	runx1 (aml1)
EOG09160BV1	Aedes aegypti	7159:0001c7	AAEL000490	8	15	23	27	83	0.7091	Q16IE4	Histone H4
EOG09160BV1	Aedes aegypti	7159:0001d2	AAEL000501	8	15	23	27	83	0.7091	Q16IE4	Histone H4
EOG09160BV1	Aedes aegypti	7159:0001de	AAEL000513	8	15	23	27	83	0.7091	Q16IE4	Histone H4
EOG09160BV1	Aedes aegypti	7159:0001e2	AAEL000517	8	15	23	27	83	0.7091	Q16IE4	Histone H4
EOG09160BV1	Aedes aegypti	7159:000dbf	AAEL003673	8	15	23	27	83	0.7091	Q16IE4	Histone H4
EOG09160BV1	Aedes aegypti	7159:000dcf	AAEL003689	8	15	23	27	83	0.7091	Q16IE4	Histone H4
EOG09160BV1	Aedes aegypti	7159:000e48	AAEL003814	8	15	23	27	83	0.7091	Q16IE4	Histone H4
EOG09160BV1	Aedes aegypti	7159:000e51	AAEL003823	8	15	23	27	83	0.7091	Q16IE4	Histone H4
EOG09160BV1	Aedes aegypti	7159:000e5b	AAEL003833	8	15	23	27	83	0.7091	Q17EE8	Histone H4
EOG09160BV1	Aedes aegypti	7159:000e60	AAEL003838	8	15	23	27	83	0.7091	Q16IE4	Histone H4
EOG09160BV1	Aedes aegypti	7159:000e68	AAEL003846	8	15	23	27	83	0.7091	Q16IE4	Histone H4
EOG09160BV1	Aedes aegypti	7159:000e79	AAEL003863	8	15	23	27	83	0.7091	Q17EE8	Histone H4
EOG09160BV1	Aedes aegypti	7159:000e7c	AAEL003866	8	15	23	27	83	0.7091	Q16IE4	Histone H4
EOG09160BV1	Aedes aegypti	7159:002ce0	AAEL011999	8	15	23	27	83	0.7091	Q16IE4	Histone H4
EOG09160BV1	Aedes aegypti	7159:003341	AAEL013709	8	15	23	27	83	0.7091	Q16IE4	Histone H4
EOG091609V5	Aedes aegypti	7159:00369a	AAEL014639	25	1	26	27	27	0.7097	Q16FT8	Similarity:Belongs to the ubiquitin-conjugating enzyme family.
EOG091609V5	Aedes aegypti	7159:00369d	AAEL014642	25	1	26	27	27	0.7097	Q16FT8	Similarity:Belongs to the ubiquitin-conjugating enzyme family.
EOG0916002J	Aedes aegypti	7159:002541	AAEL009959	24	3	27	27	30	0.7111	Q16UB0	pre-mRNA splicing factor prp8
EOG09160AYX	Aedes aegypti	7159:0001cb	AAEL000494	14	9	23	27	65	0.7113	Q173V2	Histone H2A
EOG09160AYX	Aedes aegypti	7159:0001ce	AAEL000497	14	9	23	27	65	0.7113	Q173V2	Histone H2A
EOG09160AYX	Aedes aegypti	7159:0001e3	AAEL000518	14	9	23	27	65	0.7113	Q173V2	Histone H2A
EOG09160AYX	Aedes aegypti	7159:0001e9	AAEL000525	14	9	23	27	65	0.7113	Q173V2	Histone H2A
EOG09160AYX	Aedes aegypti	7159:000e4c	AAEL003818	14	9	23	27	65	0.7113	Q173V2	Histone H2A
EOG09160AYX	Aedes aegypti	7159:000e4e	AAEL003820	14	9	23	27	65	0.7113	Q17EF0	Histone H2A
EOG09160AYX	Aedes aegypti	7159:000e54	AAEL003826	14	9	23	27	65	0.7113	Q173V2	Histone H2A
EOG09160AYX	Aedes aegypti	7159:000e6d	AAEL003851	14	9	23	27	65	0.7113	Q173V2	Histone H2A
EOG09160AYX	Aedes aegypti	7159:000e78	AAEL003862	14	9	23	27	65	0.7113	Q173V2	Histone H2A
EOG09160AYX	Aedes aegypti	7159:001a34	AAEL007005	14	9	23	27	65	0.7113	Q173V2	Histone H2A
EOG0916081M	Aedes aegypti	7159:00389d	AAEL015271	25	0	25	27	25	0.7117	Q1DH30	Similarity:Belongs to the small GTPase superfamily. Rho family.
EOG091604Y9	Aedes aegypti	7159:002942	AAEL011025	25	0	25	27	25	0.7119	Q1HQS1	vacuolar ATP synthase subunit ac39
EOG091607WU	Aedes aegypti	7159:00191f	AAEL006713	25	1	26	27	27	0.713	Q175B6	Similarity:Contains RRM (RNA recognition motif) domain.
EOG091609G6	Aedes aegypti	7159:0017f0	AAEL006401	25	0	25	27	25	0.713	Q1HQS6	mitosis protein dim1
EOG09160BDY	Aedes aegypti	7159:000515	AAEL001382	22	1	23	27	24	0.713	Q17DD1	small nuclear ribonucleoprotein sm d1
EOG09160BDY	Aedes aegypti	7159:000ff6	AAEL004263	22	1	23	27	24	0.713	Q17DD1	small nuclear ribonucleoprotein sm d1
EOG091600H8	Aedes aegypti	7159:003ac7	AAEL017213	25	1	26	27	27	0.7132	NA	NA
EOG09160850	Aedes aegypti	7159:0006f2	AAEL001875	26	0	26	27	26	0.7137	Q17JX7	Uncharacterised protein family UPF0047
EOG091607OS	Aedes aegypti	7159:00297b	AAEL011087	25	1	26	27	27	0.7138	Q16R36	DNA-directed RNA polymerase II
EOG091605H1	Aedes aegypti	7159:002e43	AAEL012365	17	0	17	27	17	0.7146	Q16MB5	o-linked n-acetylglucosamine transferase, ogt
EOG091609WZ	Aedes aegypti	7159:0030f9	RpL23-A;RpL23-B;RpL23-C	24	1	25	27	27	0.7146	Q9GNE2	AeRpL17A
EOG091609WZ	Aedes aegypti	7159:0032d5	RpL23-A;RpL23-B;RpL23-C	24	1	25	27	27	0.7146	Q9GNE2	AeRpL17A
EOG091609WZ	Aedes aegypti	7159:0037da	RpL23-A;RpL23-B;RpL23-C	24	1	25	27	27	0.7146	Q9GNE2	AeRpL17A
EOG09160BJX	Aedes aegypti	7159:002a07	AAEL011233	8	0	8	27	8	0.7146	Q16QN6	SM protein G, putative
EOG09160BOS	Aedes aegypti	7159:001228	AAEL004848	20	1	21	27	22	0.7146	Q0IFI7	small nuclear ribonucleoprotein, core, putative
EOG09160BOS	Aedes aegypti	7159:0034e8	AAEL014169	20	1	21	27	22	0.7146	Q16H37	small nuclear ribonucleoprotein, core, putative
EOG0916044M	Aedes aegypti	7159:001115	AAEL004563	25	1	26	27	27	0.7147	Q1HQM1	Similarity:Belongs to the AAA ATPase family.
EOG09160C88	Aedes aegypti	7159:00146c	RpL38	19	1	20	27	21	0.7151	Q1HRT4	60S ribosomal protein L38
EOG091609ME	Aedes aegypti	7159:0007e1	AAEL002118	26	0	26	27	26	0.7155	Q17J88	Similarity:Belongs to the ubiquitin-conjugating enzyme family.
EOG09160A6B	Aedes aegypti	7159:0031f1	AAEL013353	21	0	21	27	21	0.7155	Q16JE9	Profilin
EOG091604O6	Aedes aegypti	7159:0003cd	AAEL001041	13	12	25	27	44	0.7158	Q17MH7	guanine nucleotide-binding protein beta 3 (g protein beta3)
EOG091604O6	Aedes aegypti	7159:003442	AAEL013991	13	12	25	27	44	0.7158	Q16HK1	guanine nucleotide-binding protein beta 3 (g protein beta3)
EOG091604O6	Aedes aegypti	7159:003448	AAEL013997	13	12	25	27	44	0.7158	Q16HK0	guanine nucleotide-binding protein beta 3 (g protein beta3)
EOG091609ZM	Aedes aegypti	7159:0001bf	AAEL000482	6	21	27	27	112	0.716	Q16N56	Histone H3
EOG091609ZM	Aedes aegypti	7159:0001c9	AAEL000492	6	21	27	27	112	0.716	Q16N56	Histone H3
EOG091609ZM	Aedes aegypti	7159:0001d7	AAEL000506	6	21	27	27	112	0.716	Q16N56	Histone H3
EOG091609ZM	Aedes aegypti	7159:000db3	AAEL003659	6	21	27	27	112	0.716	Q16N56	Histone H3
EOG091609ZM	Aedes aegypti	7159:000dcb	AAEL003685	6	21	27	27	112	0.716	Q17ER7	Histone H3
EOG091609ZM	Aedes aegypti	7159:000e55	AAEL003827	6	21	27	27	112	0.716	Q17EE9	Histone H3
EOG091609ZM	Aedes aegypti	7159:000e56	AAEL003828	6	21	27	27	112	0.716	Q16N56	Histone H3
EOG091609ZM	Aedes aegypti	7159:000e5e	AAEL003836	6	21	27	27	112	0.716	Q16N56	Histone H3
EOG091609ZM	Aedes aegypti	7159:000e6c	AAEL003850	6	21	27	27	112	0.716	Q16N56	Histone H3
EOG091609ZM	Aedes aegypti	7159:000e6e	AAEL003852	6	21	27	27	112	0.716	Q16N56	Histone H3
EOG091609ZM	Aedes aegypti	7159:000e72	AAEL003856	6	21	27	27	112	0.716	Q16N56	Histone H3
EOG091609ZM	Aedes aegypti	7159:00170d	AAEL006158	6	21	27	27	112	0.716	Q177E2	Histone H3
EOG091609ZM	Aedes aegypti	7159:002ac1	AAEL011424	6	21	27	27	112	0.716	Q0IEB9	Histone H3
EOG091609ZM	Aedes aegypti	7159:002d28	AAEL012072	6	21	27	27	112	0.716	Q16N56	Histone H3
EOG091603NK	Aedes aegypti	7159:003065	AAEL012943	26	0	26	27	26	0.717	Q16KL0	Similarity:Belongs to the AAA ATPase family.
EOG091609B3	Aedes aegypti	7159:000397	AAEL000983	26	0	26	27	26	0.7172	Q17MI3	clathrin coat assembly protein ap19
EOG091608IR	Aedes aegypti	7159:0034f0	AAEL014177	26	0	26	27	26	0.7177	Q16H28	Similarity:Belongs to the small GTPase superfamily. Arf family.
EOG09160202	Aedes aegypti	7159:0028d8	dbo	26	0	26	27	26	0.7179	Q16RL8	Kelch-like protein diablo
EOG0916036I	Aedes aegypti	7159:0024f6	AAEL009882	25	0	25	27	25	0.7179	Q16UI5	retinoblastoma-binding protein 4 (rbbp4)
EOG09160BY5	Aedes aegypti	7159:00329d	AAEL013527	24	1	25	27	26	0.7179	Q16IW3	U1 small nuclear ribonucleoprotein C
EOG09160BYZ	Aedes aegypti	7159:001fa4	AAEL008458	26	0	26	27	26	0.7182	Q16YQ1	Ubiquitin domain
EOG091607FM	Aedes aegypti	7159:00338b	AAEL013786	23	2	25	27	27	0.719	Q16GF8	Similarity:Contains 2 SH3 domains.
EOG091607FM	Aedes aegypti	7159:0035c4	AAEL014394	23	2	25	27	27	0.719	Q16GF8	Similarity:Contains 2 SH3 domains.
EOG091603Y5	Aedes aegypti	7159:000477	AAEL001216	22	5	27	27	33	0.7193	Q1HR75	DEAD box ATP-dependent RNA helicase
EOG09160BCN	Aedes aegypti	7159:002084	AAEL008692	22	0	22	27	22	0.7193	Q1HRI3	barrier-to-autointegration factor, putative
EOG091605Q1	Aedes aegypti	7159:0023f3	AAEL009614	26	0	26	27	26	0.7194	Q16VC2	E3 ubiquitin-protein ligase
EOG09160ACB	Aedes aegypti	7159:00105f	AAEL004378	26	1	27	27	28	0.7194	Q1HQP4	Function:Seems to be required for maximal rate of protein biosynthesis. Enhances ribosome dissociation into subunits and stabilizes the binding of the initiator Met-tRNA(I) to 40 S ribosomal subunits.
EOG0916030P	Aedes aegypti	7159:003a58	AAEL017096	7	20	27	27	49	0.7196	NA	NA
EOG0916030P	Aedes aegypti	7159:003b1d	AAEL017301	7	20	27	27	49	0.7196	NA	NA
EOG091607CH	Aedes aegypti	7159:0022bb	AAEL009287	26	0	26	27	26	0.72	Q16WA1	ran
EOG091603Y4	Aedes aegypti	7159:0011f5	AAEL004797	23	2	25	27	27	0.7203	Q17BW3	Mitogen-activated protein kinase
EOG091603Y4	Aedes aegypti	7159:002de8	AAEL012269	23	2	25	27	27	0.7203	Q16MK9	serine/threonine kinase NLK
EOG091608IT	Aedes aegypti	7159:003066	AAEL012944	26	0	26	27	26	0.7203	Q16KL1	Similarity:Belongs to the ribosomal protein L5P family.
EOG091609Q9	Aedes aegypti	7159:0006c6	AAEL001831	25	0	25	27	25	0.7205	Q1HRD6	DNA-directed RNA polymerase subunit
EOG091606AD	Aedes aegypti	7159:002ca3	GSTZ1	22	2	24	27	26	0.7207	Q16NL9	Similarity:Belongs to the GST superfamily.
EOG091606LS	Aedes aegypti	7159:002996	AAEL011116	26	0	26	27	26	0.7209	Q16QZ7	Similarity:Belongs to the 14-3-3 family.
EOG091606KD	Aedes aegypti	7159:001f54	AAEL008372	5	1	6	27	7	0.7211	Q16YZ9	sulfatase-1, sulf-1
EOG091608LV	Aedes aegypti	7159:000cb7	AAEL003401	19	0	19	27	19	0.7212	Q17FM2	DNA-directed RNA polymerase II 19 kDa polypeptide rpb7
EOG09160AWF	Aedes aegypti	7159:0018c3	AAEL006619	24	0	24	27	24	0.7214	Q175K5	PKC-activated phosphatase-1 inhibitor
EOG09160648	Aedes aegypti	7159:0000f8	AAEL000270	25	0	25	27	25	0.7215	Q17PP0	Similarity:Contains MPN (JAB/Mov34) domain.
EOG09160082	Aedes aegypti	7159:003b59	AAEL017363	26	1	27	27	28	0.7216	NA	NA
EOG091605IJ	Aedes aegypti	7159:0011b9	AAEL004733	26	0	26	27	26	0.7217	Q1HQQ2	Similarity:Contains MPN (JAB/Mov34) domain.
EOG091603E2	Aedes aegypti	7159:000a99	AAEL002827	10	15	25	27	42	0.7218	Q17H12	ATP synthase subunit beta
EOG091603E2	Aedes aegypti	7159:000cb0	AAEL003393	10	15	25	27	42	0.7218	Q17FL3	ATP synthase subunit beta
EOG091604EV	Aedes aegypti	7159:0008f3	Cdk8	23	1	24	27	25	0.722	Q17IE8	Cell division protein kinase 8
EOG09160AAG	Aedes aegypti	7159:00361f	AAEL014513	17	1	18	27	19	0.722	Q16G59	Histone acetyltransferase
EOG091608CS	Aedes aegypti	7159:000682	AAEL001759	25	0	25	27	25	0.7222	Q1HRP3	Similarity:Belongs to the ribosomal protein S4P family.
EOG09160883	Aedes aegypti	7159:001af1	AAEL007209	25	0	25	27	25	0.7224	Q172Z9	Similarity:Belongs to the small GTPase superfamily. Arf family.
EOG091609DJ	Aedes aegypti	7159:001d1d	AAEL007790	26	0	26	27	26	0.7225	Q170V3	maternal g10 transcript
EOG0916086O	Aedes aegypti	7159:002466	AAEL009732	23	2	25	27	27	0.7226	Q16V02	Similarity:Belongs to the small GTPase superfamily. Rho family.
EOG091604DA	Aedes aegypti	7159:001b44	AAEL007297	27	0	27	27	27	0.7229	Q172T1	Similarity:Belongs to the AAA ATPase family.
EOG09160A29	Aedes aegypti	7159:002656	AAEL010244	26	0	26	27	26	0.723	Q1HR14	Similarity:Contains 1 BTB (POZ) domain.
EOG0916055G	Aedes aegypti	7159:000473	AAEL001211	25	0	25	27	25	0.7231	Q17LX9	COMPASS component SWD2, putative
EOG091603BB	Aedes aegypti	7159:001fce	AAEL008500	27	0	27	27	27	0.7232	Q16YL3	Similarity:Belongs to the DEAD box helicase family.
EOG091602JN	Aedes aegypti	7159:002d8c	AAEL012175	27	0	27	27	27	0.7234	Q1HRQ7	ATP synthase subunit alpha
EOG09160305	Aedes aegypti	7159:002794	AAEL010570	25	0	25	27	25	0.7236	Q16SL2	Similarity:Belongs to the ligand-gated ion channel (TC 1.A.9) family.
EOG091608HS	Aedes aegypti	7159:001269	AAEL004913	25	0	25	27	25	0.7236	Q17BN9	Similarity:Belongs to the small GTPase superfamily. Arf family.
EOG091603U1	Aedes aegypti	7159:000aab	AAEL002848	24	0	24	27	24	0.724	Q17GX8	Function:Tubulin is the major constituent of microtubules. It binds two moles of GTP, one at an exchangeable site on the beta chain and one at a non-exchangeable site on the alpha chain.
EOG09160ABX	Aedes aegypti	7159:001191	AAEL004691	24	0	24	27	24	0.7246	Q1HQX8	ring finger
EOG09160AT7	Aedes aegypti	7159:0007f7	AAEL002140	20	1	21	27	22	0.7247	Q17J10	Transcription initiation factor IIA subunit 2
EOG09160AT7	Aedes aegypti	7159:000805	AAEL002154	20	1	21	27	22	0.7247	Q17J11	Transcription initiation factor IIA subunit 2
EOG0916050C	Aedes aegypti	7159:000a90	AAEL002818	25	2	27	27	29	0.7249	Q17H60	splicing factor u2af large subunit
EOG09160B1M	Aedes aegypti	7159:000c8d	AAEL003352	23	0	23	27	23	0.725	Q1HQW0	ribosomal protein l7ae
EOG09160AGP	Aedes aegypti	7159:000a9d	AAEL002832	26	0	26	27	26	0.7254	Q1HQE4	40S ribosomal protein S26
EOG0916025A	Aedes aegypti	7159:003c2b	AAEL017973	5	7	12	27	29	0.7258	NA	heat shock protein HSP70
EOG0916025A	Aedes aegypti	7159:003c2c	AAEL017974	5	7	12	27	29	0.7258	NA	heat shock protein HSP70
EOG0916025A	Aedes aegypti	7159:003c2d	AAEL017975	5	7	12	27	29	0.7258	NA	heat shock protein HSP70
EOG0916025A	Aedes aegypti	7159:003c2e	AAEL017976	5	7	12	27	29	0.7258	NA	heat shock protein HSP70
EOG0916025A	Aedes aegypti	7159:003c30	AAEL017978	5	7	12	27	29	0.7258	NA	heat shock protein HSP70
EOG0916025A	Aedes aegypti	7159:003c31	AAEL017979	5	7	12	27	29	0.7258	NA	heat shock protein HSP70
EOG0916025A	Aedes aegypti	7159:003c32	AAEL017980	5	7	12	27	29	0.7258	NA	heat shock protein HSP70
EOG091606D9	Aedes aegypti	7159:003377	AAEL013766	23	1	24	27	25	0.7258	Q16I79	Chitin binding domain
EOG09160BWP	Aedes aegypti	7159:003933	AAEL015473	7	0	7	27	7	0.7261	Q1DGU7	Zinc finger, C2H2
EOG0916052G	Aedes aegypti	7159:001ca5	AAEL007662	24	2	26	27	28	0.7264	Q171G6	Similarity:Belongs to the protein kinase superfamily.
EOG091607WO	Aedes aegypti	7159:002573	AAEL010012	22	0	22	27	22	0.7266	Q1HR30	Similarity:Belongs to the small GTPase superfamily. SAR1 family.
EOG09160COU	Aedes aegypti	7159:0019aa	AAEL006860	17	1	18	27	19	0.7266	Q1HR28	ribosomal protein S28, putative
EOG091603JB	Aedes aegypti	7159:001573	AAEL005730	25	0	25	27	25	0.7267	Q178X3	Similarity:Contains PCI domain.
EOG091603ZB	Aedes aegypti	7159:002bf6	AAEL011750	22	0	22	27	22	0.7267	Q16P63	Similarity:Belongs to the actin family.
EOG09160824	Aedes aegypti	7159:00318f	AAEL013252	25	0	25	27	25	0.7269	Q16JQ4	Similarity:Belongs to the small GTPase superfamily. Rab family.
EOG091604UO	Aedes aegypti	7159:000880	AAEL002277	19	4	23	27	27	0.7272	Q17IR9	cAMP-dependent protein kinase type i-beta regulatory subunit
EOG0916087T	Aedes aegypti	7159:003700	AAEL014749	24	2	26	27	28	0.7275	Q16FH9	ral
EOG09160AOF	Aedes aegypti	7159:0010ac	AAEL004457	15	5	20	27	25	0.7275	Q1HRI9	Function:Electron carrier protein. The oxidized form of the cytochrome c heme group can accept an electron from the heme group of the cytochrome c1 subunit of cytochrome reductase. Cytochrome c then transfers this electron to the cytochrome oxidase complex, the final protein carrier in the mitochondrial electron-transport chain.
EOG0916078U	Aedes aegypti	7159:000180	AAEL000414	26	1	27	27	28	0.7278	Q17PA2	six/sine homebox transcription factors
EOG0916083I	Aedes aegypti	7159:000806	AAEL002155	21	0	21	27	21	0.7279	Q17J36	Similarity:Belongs to the small GTPase superfamily. Rab family.
EOG091606A1	Aedes aegypti	7159:0019b1	AAEL006867	20	1	21	27	22	0.728	Q174K1	Armadillo-like helical
EOG091600VC	Aedes aegypti	7159:001b4d	AAEL007306	26	1	27	27	28	0.7286	Q172T4	alpha-actinin
EOG09160375	Aedes aegypti	7159:001ba6	AAEL007400	22	3	25	27	28	0.7288	Q172G4	signal recognition particle 54 kda protein
EOG09160375	Aedes aegypti	7159:0030e6	AAEL013076	22	3	25	27	28	0.7288	Q16K92	signal recognition particle 54 kda protein
EOG09160684	Aedes aegypti	7159:002c0f	AAEL011776	26	0	26	27	26	0.729	Q16P33	soluble nsf attachment protein (snap)
EOG09160B3X	Aedes aegypti	7159:0018c0	AAEL006616	3	1	4	27	5	0.729	Q175M7	NA
EOG09160B3X	Aedes aegypti	7159:0035f5	AAEL014449	3	1	4	27	5	0.729	Q16GA3	ribose-phosphate pyrophosphokinase 1,
EOG09160304	Aedes aegypti	7159:00257c	AAEL010021	23	1	24	27	25	0.7291	Q16U52	Catalytic Activity:ATP + a protein = ADP + a phosphoprotein.
EOG09160304	Aedes aegypti	7159:00374e	AAEL014849	23	1	24	27	25	0.7291	Q16F97	serine/threonine-protein kinase 38 (ndr2 protein kinase)
EOG091608SZ	Aedes aegypti	7159:002f9b	AAEL012733	27	0	27	27	27	0.7291	Q16L85	60S ribosomal protein L19
EOG09160706	Aedes aegypti	7159:002972	AAEL011078	24	1	25	27	26	0.7294	Q16R55	C-Type Lectin (CTL) - galactose binding.
EOG09160BTZ	Aedes aegypti	7159:003440	AAEL013989	17	1	18	27	19	0.7296	Q1HR43	Transmembrane:Helical
EOG09160BGY	Aedes aegypti	7159:00338c	AAEL013787	11	7	18	27	26	0.7302	Q16I57	Small ubiquitin-related modifier
EOG091607HD	Aedes aegypti	7159:001f1c	AAEL008314	6	0	6	27	6	0.7303	Q16Z57	cadherin, putative
EOG09160ALN	Aedes aegypti	7159:000ec7	AAEL003942	25	1	26	27	27	0.7303	Q1HRN0	Similarity:Belongs to the ribosomal protein L44e family.
EOG09160B13	Aedes aegypti	7159:0026b6	AAEL010340	22	0	22	27	22	0.7305	Q1HQW9	serine/arginine rich splicing factor
EOG0916061H	Aedes aegypti	7159:000823	AAEL002184	26	0	26	27	26	0.7311	Q17J03	F-actin capping protein beta subunit
EOG091609ZS	Aedes aegypti	7159:000753	AAEL001972	14	0	14	27	14	0.7313	Q17JG3	TATA box binding protein (TBP)-associated factor,, putative
EOG091607VO	Aedes aegypti	7159:002e36	AAEL012352	27	0	27	27	27	0.7314	Q16MC0	Transmembrane:Helical
EOG091608VI	Aedes aegypti	7159:0016f6	Cbp20	15	0	15	27	15	0.7315	Q177H0	20 kDa nuclear cap-binding protein
EOG091602Q4	Aedes aegypti	7159:001a92	AAEL007104	26	0	26	27	26	0.7316	Q173M3	Transmembrane:Helical
EOG091607D0	Aedes aegypti	7159:003a9c	AAEL017168	16	0	16	27	16	0.7316	NA	NA
EOG091608AF	Aedes aegypti	7159:002537	AAEL009949	17	4	21	27	25	0.7317	Q16UC3	Similarity:Belongs to the Antp homeobox family.
EOG09160169	Aedes aegypti	7159:00096c	AAEL002518	11	0	11	27	11	0.7318	Q17HY9	Transmembrane:Helical
EOG091606OV	Aedes aegypti	7159:001b5b	AAEL007320	22	1	23	27	24	0.7318	Q172Q2	Band 7 domain
EOG091606OV	Aedes aegypti	7159:002622	AAEL010189	22	1	23	27	24	0.7318	Q16TM5	Band 7 protein AAEL010189
EOG09160AIW	Aedes aegypti	7159:0018df	AAEL006647	23	0	23	27	23	0.7319	Q175H7	dynein light chain, putative
EOG09160AK9	Aedes aegypti	7159:001310	AAEL005085	20	1	21	27	22	0.732	Q1HR35	60S ribosomal protein L30
EOG09160AK9	Aedes aegypti	7159:001393	AAEL005220	20	1	21	27	22	0.732	Q1HR35	60S ribosomal protein L30
EOG0916054S	Aedes aegypti	7159:000b42	AAEL003001	24	1	25	27	26	0.7321	Q17GJ0	WD-repeat protein
EOG091607DM	Aedes aegypti	7159:0032a3	AAEL013533	25	1	26	27	27	0.7323	Q16IV0	Ribosomal protein S8e/ribosomal biogenesis NSA2
EOG09160CWI	Aedes aegypti	7159:001903	AAEL006685	13	1	14	27	15	0.7323	Q175F3	Guanine nucleotide-binding protein subunit gamma
EOG091603AD	Aedes aegypti	7159:00304a	AAEL012915	25	1	26	27	27	0.7324	Q16KQ0	als2cr7
EOG091603AD	Aedes aegypti	7159:0037d4	AAEL015000	25	1	26	27	27	0.7324	Q16EV8	als2cr7
EOG0916050P	Aedes aegypti	7159:002d3d	AAEL012094	27	0	27	27	27	0.7324	Q16N28	casein kinase ii, alpha chain (cmgc group iv)
EOG09160AKS	Aedes aegypti	7159:0018a9	AAEL006593	21	5	26	27	32	0.7325	Q175P9	Similarity:Contains homeobox DNA-binding domain.
EOG09160BA0	Aedes aegypti	7159:001410	AAEL005355	24	0	24	27	24	0.7329	Q17AC0	small nuclear ribonucleoprotein sm
EOG091607EY	Aedes aegypti	7159:003bac	AAEL017447	23	3	26	27	29	0.733	NA	NA
EOG09160985	Aedes aegypti	7159:0000a6	AAEL000179	24	0	24	27	24	0.733	Q17PZ8	Similarity:Belongs to the ubiquitin-conjugating enzyme family.
EOG0916035O	Aedes aegypti	7159:003475	AAEL014042	27	0	27	27	27	0.7332	Q16HF3	Serine/threonine-protein phosphatase 2A 55 kDa regulatory subunit B
EOG091600S7	Aedes aegypti	7159:001e3f	AAEL008090	15	1	16	27	17	0.7333	Q16ZR9	Transmembrane:Helical
EOG091600S7	Aedes aegypti	7159:003333	AAEL013695	15	1	16	27	17	0.7333	Q16IF5	Transmembrane:Helical
EOG091602HA	Aedes aegypti	7159:0017ef	AAEL006400	27	0	27	27	27	0.7334	Q0IF73	elongator component, putative
EOG091604EA	Aedes aegypti	7159:00143a	AAEL005400	21	3	24	27	27	0.7335	Q17A41	Similarity:Belongs to the D-isomer specific 2-hydroxyacid dehydrogenase family.
EOG091603SV	Aedes aegypti	7159:0004b6	AAEL001283	24	1	25	27	26	0.7336	Q17LT8	WD40 repeat
EOG091603SV	Aedes aegypti	7159:0037ff	AAEL015054	24	1	25	27	26	0.7336	Q16ER3	WD-repeat protein 47
EOG091606XY	Aedes aegypti	7159:001fa7	AAEL008461	16	2	18	27	20	0.7337	Q1HQL8	Transmembrane:Helical
EOG09160764	Aedes aegypti	7159:0019c3	14-3-3zeta	23	0	23	27	23	0.734	Q1HR36	14-3-3 protein zeta
EOG091603RH	Aedes aegypti	7159:0026f5	AAEL010403	27	0	27	27	27	0.7341	Q16T24	Similarity:Contains dynamin-type G (guanine nucleotide-binding) domain.
EOG091608SC	Aedes aegypti	7159:001d3d	AAEL007822	21	0	21	27	21	0.7341	Q170S2	Similarity:Belongs to the ubiquitin-conjugating enzyme family.
EOG09160079	Aedes aegypti	7159:0032f2	AAEL013614	26	1	27	27	28	0.7343	Q16IM0	Clathrin heavy chain
EOG091606ZQ	Aedes aegypti	7159:0025be	AAEL010087	24	1	25	27	26	0.7343	Q16TY4	Proteasome subunit alpha type
EOG09160BIF	Aedes aegypti	7159:0004fb	AAEL001356	27	0	27	27	27	0.7344	Q17LH0	RNA-binding protein
EOG09160C3I	Aedes aegypti	7159:000f06	AAEL004005	14	0	14	27	14	0.7348	Q17DU9	Homeobox domain
EOG09160510	Aedes aegypti	7159:00351f	shakB	23	1	24	27	25	0.7349	Q1DH70	Innexin shaking-B
EOG091605NB	Aedes aegypti	7159:003cd3	AAEL018160	26	1	27	27	28	0.7355	NA	NA
EOG091606L5	Aedes aegypti	7159:002307	AAEL009370	23	2	25	27	27	0.7355	Q16W18	pur-alpha
EOG091606L5	Aedes aegypti	7159:002d63	AAEL012134	23	2	25	27	27	0.7355	Q16N05	pur-alpha
EOG091604A1	Aedes aegypti	7159:000b44	AAEL003003	22	4	26	27	31	0.7357	Q17GI6	Similarity:Belongs to the ligand-gated ion channel (TC 1.A.9) family.
EOG091602IH	Aedes aegypti	7159:000ec2	AAEL003937	21	1	22	27	23	0.7358	Q0IFY1	Tyrosine-protein kinase
EOG091602IH	Aedes aegypti	7159:002fac	AAEL012752	21	1	22	27	23	0.7358	Q0IFY1	Tyrosine-protein kinase
EOG091609G7	Aedes aegypti	7159:002c69	AAEL011873	22	2	24	27	26	0.7358	Q1HR39	ubiquitin-conjugating enzyme
EOG091609G7	Aedes aegypti	7159:0039b3	AAEL015648	22	2	24	27	26	0.7358	Q1DGG0	ubiquitin-conjugating enzyme
EOG09160714	Aedes aegypti	7159:001ea5	AAEL008192	27	0	27	27	27	0.7362	Q4F6X0	Similarity:Belongs to the ribosomal protein S3P family.
EOG091601DP	Aedes aegypti	7159:0027a3	AAEL010585	26	1	27	27	28	0.7363	Q16SH1	Similarity:Belongs to the AAA ATPase family.
EOG091601DP	Aedes aegypti	7159:002e42	AAEL012364	26	1	27	27	28	0.7363	Q16MA3	Similarity:Belongs to the AAA ATPase family.
EOG091608UM	Aedes aegypti	7159:000c61	AAEL003306	19	3	22	27	25	0.7366	Q17FV0	MRAS2, putative
EOG091609TN	Aedes aegypti	7159:0013bf	RpS14	10	14	24	27	48	0.7366	Q1HR24	40S ribosomal protein S14
EOG091601W9	Aedes aegypti	7159:0025a2	AAEL010059	27	0	27	27	27	0.7371	Q16U05	Similarity:Belongs to the ABC transporter superfamily.
EOG091609IW	Aedes aegypti	7159:000276	AAEL000677	25	1	26	27	27	0.7373	Q17NL0	DNA-directed RNA polymerase subunit rpb8
EOG091600PP	Aedes aegypti	7159:002d1f	AAEL012062	24	1	25	27	26	0.7374	Q16N74	Sodium/potassium-transporting ATPase subunit alpha
EOG091607TQ	Aedes aegypti	7159:001304	AAEL005072	23	0	23	27	23	0.7374	Q17B64	MRAS2, putative
EOG091607IA	Aedes aegypti	7159:001d52	AAEL007845	24	1	25	27	26	0.7376	Q170P3	Similarity:Belongs to the small GTPase superfamily. Rab family.
EOG091607MI	Aedes aegypti	7159:000d1b	AAEL003503	25	0	25	27	25	0.7376	Q17F70	Similarity:Belongs to the small GTPase superfamily. Rab family.
EOG091608JK	Aedes aegypti	7159:002d27	AAEL012071	27	0	27	27	27	0.7376	Q16N58	ras
EOG091600R0	Aedes aegypti	7159:00189e	AAEL006582	26	1	27	27	28	0.7377	Q175R3	Calcium-transporting ATPase
EOG091606Q4	Aedes aegypti	7159:0025db	AAEL010116	25	1	26	27	27	0.7377	Q16TU7	EF-Hand 1, calcium-binding site
EOG0916095S	Aedes aegypti	7159:00318e	AAEL013251	20	1	21	27	22	0.7377	Q16JQ1	Protein quiver
EOG09160C89	Aedes aegypti	7159:002a5c	AAEL011320	22	0	22	27	22	0.7377	Q16QE3	Guanine nucleotide-binding protein subunit gamma
EOG09160BQF	Aedes aegypti	7159:003630	AAEL014530	4	0	4	27	4	0.7378	Q16G42	Calcium/calmodulin-dependent/calcium-dependent protein kinase
EOG09160545	Aedes aegypti	7159:002dd7	AAEL012250	25	0	25	27	25	0.7381	Q16MM8	developmentally regulated GTP-binding protein 2 (drg 2)
EOG0916062Z	Aedes aegypti	7159:00091b	AAEL002436	23	2	25	27	27	0.7383	Q1HRE2	Transmembrane:Helical
EOG091607JR	Aedes aegypti	7159:00260f	AAEL010170	24	0	24	27	24	0.7383	Q16TQ1	Similarity:Belongs to the small GTPase superfamily. Rab family.
EOG09160270	Aedes aegypti	7159:001132	AAEL004592	21	2	23	27	25	0.7384	Q17CE8	Tyrosine-protein kinase
EOG09160AGI	Aedes aegypti	7159:002b0f	AAEL011504	19	1	20	27	21	0.7384	Q16PW8	Similarity:Contains chitin-binding type R&R domain.
EOG091607ND	Aedes aegypti	7159:00016d	AAEL000394	25	0	25	27	25	0.7385	Q0IGF8	U2 small nuclear ribonucleoprotein, putative
EOG091604Y7	Aedes aegypti	7159:0030df	AAEL013069	26	1	27	27	28	0.7387	Q1HRQ2	receptor for activated protein kinase c (rack1)
EOG0916096X	Aedes aegypti	7159:001025	AAEL004313	26	1	27	27	28	0.7388	Q17D71	fk506-binding protein
EOG091604F0	Aedes aegypti	7159:000f83	AAEL004138	26	1	27	27	28	0.7391	Q17DJ3	Transmembrane:Helical
EOG091602M4	Aedes aegypti	7159:000c7d	AAEL003336	24	3	27	27	30	0.7392	Q17FP1	tRNA-splicing ligase RtcB homolog
EOG091603JX	Aedes aegypti	7159:00279c	AAEL010578	7	0	7	27	7	0.7393	Q16SG1	Histone-lysine N-methyltransferase
EOG0916029D	Aedes aegypti	7159:000cc9	AAEL003419	23	3	26	27	29	0.7394	Q17FC9	Chitin binding domain
EOG091605G4	Aedes aegypti	7159:003caa	AAEL018119	25	1	26	27	27	0.7395	NA	NA
EOG09160AYQ	Aedes aegypti	7159:001769	AAEL006256	25	1	26	27	27	0.7395	Q176V7	Similarity:Belongs to the ATPase C chain family.
EOG09160AYQ	Aedes aegypti	7159:002fa2	AAEL012740	25	1	26	27	27	0.7395	Q1HRU4	Similarity:Belongs to the ATPase C chain family.
EOG09160C0N	Aedes aegypti	7159:00209d	AAEL008719	23	0	23	27	23	0.7396	Q16XZ1	Sm protein G, putative
EOG091604SD	Aedes aegypti	7159:0022b0	AAEL009275	9	18	27	27	45	0.7398	Q1HR05	Serine/threonine-protein phosphatase
EOG091604SD	Aedes aegypti	7159:003148	AAEL013181	9	18	27	27	45	0.7398	Q16JX4	Serine/threonine-protein phosphatase
EOG09160ARK	Aedes aegypti	7159:00246f	AAEL009741	15	11	26	27	40	0.7404	Q16UZ7	NA
EOG09160ARK	Aedes aegypti	7159:002470	abd-A	15	11	26	27	40	0.7404	P29552	Homeobox protein abdominal-A homolog
EOG09160ARK	Aedes aegypti	7159:0033b6	ABDA_AEDAE_b	15	11	26	27	40	0.7404	Q16I14	Similarity:Contains homeobox DNA-binding domain.
EOG091607ON	Aedes aegypti	7159:001fac	AAEL008466	4	11	15	27	26	0.7407	Q16YQ0	Similarity:Contains homeobox DNA-binding domain.
EOG091600XM	Aedes aegypti	7159:000e10	AAEL003754	25	1	26	27	27	0.741	Q0IFZ8	actin binding
EOG0916066R	Aedes aegypti	7159:00321b	CycC	24	0	24	27	24	0.7411	Q16JA2	Cyclin-C
EOG0916054T	Aedes aegypti	7159:0014e5	AAEL005579	27	0	27	27	27	0.7415	Q179N3	developmentally regulated GTP-binding protein 1 (drg 1)
EOG091602KY	Aedes aegypti	7159:000ccf	AAEL003425	27	0	27	27	27	0.7417	Q17FD0	Chitin binding domain
EOG09160117	Aedes aegypti	7159:002b96	AAEL011650	27	0	27	27	27	0.7419	Q16PF3	AP complex subunit beta
EOG091606LP	Aedes aegypti	7159:0023f7	AAEL009619	26	1	27	27	28	0.7419	Q16VB8	Transmembrane:Helical
EOG09160744	Aedes aegypti	7159:000ceb	AAEL003454	24	1	25	27	26	0.7419	Q17F92	phocein protein, putative
EOG09160ADC	Aedes aegypti	7159:00289d	AAEL010850	17	1	18	27	19	0.742	Q16RS1	troponin i
EOG091609RD	Aedes aegypti	7159:00268d	AAEL010299	25	0	25	27	25	0.7421	Q1HRM3	40S ribosomal protein S12
EOG09160CCW	Aedes aegypti	7159:001d3f	AAEL007824	16	0	16	27	16	0.7421	Q1HRA1	ribosomal protein S29, putative
EOG0916082I	Aedes aegypti	7159:001ff7	Cdc42	23	0	23	27	23	0.7426	Q16YG0	Cdc42 homolog
EOG09160ASY	Aedes aegypti	7159:0015fb	AAEL005874	3	0	3	27	3	0.7427	Q178J0	Transmembrane:Helical
EOG0916018Y	Aedes aegypti	7159:0008cc	AAEL002354	25	1	26	27	27	0.7429	Q17IJ2	heme peroxidase
EOG091606UF	Aedes aegypti	7159:0006b2	AAEL001809	27	0	27	27	27	0.7429	Q17K63	Limb expression 1
EOG0916096V	Aedes aegypti	7159:002898	AAEL010843	21	1	22	27	23	0.7429	Q5QC99	Eukaryotic translation initiation factor SUI1
EOG09160BLP	Aedes aegypti	7159:0026ab	AAEL010329	21	0	21	27	21	0.7431	Q16TA9	Cyclic nucleotide-binding domain
EOG0916043S	Aedes aegypti	7159:000fa7	AAEL004178	27	0	27	27	27	0.7437	Q0IFT8	ribose-phosphate pyrophosphokinase 1
EOG091602DG	Aedes aegypti	7159:0022d8	AAEL009320	26	0	26	27	26	0.7438	Q16W74	T-complex protein 1 subunit alpha
EOG09160BH3	Aedes aegypti	7159:0013e7	AAEL005310	10	0	10	27	10	0.7438	NA	GPCR Orphan/Putative Class A Family
EOG091600WS	Aedes aegypti	7159:0010b7	AAEL004469	25	2	27	27	29	0.744	Q17CP2	adaptin, alpha/gamma/epsilon
EOG09160CER	Aedes aegypti	7159:0029b7	AAEL011151	15	0	15	27	15	0.744	Q16QW6	Calponin homology domain
EOG09160BO6	Aedes aegypti	7159:0020d4	AAEL008774	16	0	16	27	16	0.7441	Q16XT5	Zinc finger, C2H2
EOG0916002L	Aedes aegypti	7159:00380a	AAEL015065	25	2	27	27	29	0.7442	Q16EQ1	Similarity:Contains 1 SH3 domain.
EOG091602M0	Aedes aegypti	7159:001802	AAEL006419	25	1	26	27	27	0.7444	Q0IF69	recombining binding protein suppressor of hairless
EOG0916084C	Aedes aegypti	7159:0021c3	AAEL009026	25	0	25	27	25	0.7444	Q16X16	Similarity:Belongs to the ubiquitin-conjugating enzyme family.
EOG091605WL	Aedes aegypti	7159:0039ed	AAEL016984	26	0	26	27	26	0.7445	NA	NA
EOG09160BD3	Aedes aegypti	7159:002000	AAEL008552	17	1	18	27	19	0.7445	Q16YG5	SH2 domain
EOG09160BD3	Aedes aegypti	7159:002002	AAEL008554	17	1	18	27	19	0.7445	Q16YG3	SH2 domain
EOG09160CU3	Aedes aegypti	7159:000eef	AAEL003982	5	0	5	27	5	0.7446	Q17E17	NA
EOG09160BYS	Aedes aegypti	7159:0031a3	AAEL013272	24	0	24	27	24	0.7447	Q1HR76	60S ribosomal protein L37a
EOG091607U7	Aedes aegypti	7159:002251	AAEL009180	19	1	20	27	21	0.7454	Q16WL0	GTP-binding protein rit
EOG091607U7	Aedes aegypti	7159:00387a	AAEL015232	19	1	20	27	21	0.7454	Q16EF0	GTP-binding protein rit
EOG091607PH	Aedes aegypti	7159:000815	AAEL002170	3	0	3	27	3	0.7455	Q17J45	Similarity:Contains CRAL-TRIO domain.
EOG09160129	Aedes aegypti	7159:0010d6	AAEL004500	27	0	27	27	27	0.7456	Q0IFN2	eukaryotic translation elongation factor
EOG0916089F	Aedes aegypti	7159:00066a	AAEL001733	22	3	25	27	28	0.7457	Q1HRH4	Vesicle protein sorting 29
EOG0916089F	Aedes aegypti	7159:0029e0	AAEL011192	22	3	25	27	28	0.7457	Q1HRH4	Vesicle protein sorting 29
EOG0916037H	Aedes aegypti	7159:0010c2	AAEL004480	25	1	26	27	27	0.7458	Q17CQ5	cell division cycle 20 (cdc20) (fizzy)
EOG091605BX	Aedes aegypti	7159:001b56	AAEL007315	25	1	26	27	27	0.7458	Q172P9	symbol, putative
EOG091605BX	Aedes aegypti	7159:0038b0	AAEL015291	25	1	26	27	27	0.7458	Q1DH24	symbol, putative
EOG09160003	Aedes aegypti	7159:001aab	AAEL007132	23	4	27	27	32	0.746	Q173I7	dynein heavy chain
EOG0916082C	Aedes aegypti	7159:000fe8	AAEL004248	14	5	19	27	25	0.746	Q17DD2	neuronal calcium sensor
EOG091600ZM	Aedes aegypti	7159:0036fd	AAEL014746	25	1	26	27	27	0.7461	Q16FI6	o-linked n-acetylglucosamine transferase, ogt
EOG091603GX	Aedes aegypti	7159:00112c	AAEL004586	24	1	25	27	26	0.7462	Q17CE9	Histone deacetylase
EOG0916040D	Aedes aegypti	7159:002117	AAEL008849	27	0	27	27	27	0.7464	Q16XK1	selenophosphate synthase
EOG09160816	Aedes aegypti	7159:003170	AAEL013221	25	2	27	27	29	0.7464	Q16JT5	Ribosomal protein
EOG09160AIH	Aedes aegypti	7159:000cbd	AAEL003407	24	1	25	27	26	0.7464	Q17FE8	Nucleotide-binding alpha-beta plait domain
EOG09160BHT	Aedes aegypti	7159:001906	AAEL006688	19	0	19	27	19	0.747	Q175C9	Splicing factor 3B, subunit 5
EOG091604WQ	Aedes aegypti	7159:00045c	AAEL001188	25	0	25	27	25	0.7471	Q17LZ4	Gtr1/RagA G protein
EOG091603J6	Aedes aegypti	7159:000ef6	AAEL003989	23	3	26	27	29	0.7472	Q17E14	GTP-binding protein alpha subunit, gna
EOG09160A1F	Aedes aegypti	7159:002236	AAEL009151	13	13	26	27	39	0.7472	Q1HRQ6	Similarity:Belongs to the ribosomal protein S8P family.
EOG091606AV	Aedes aegypti	7159:002d87	AAEL012170	22	0	22	27	22	0.7474	Q16MX4	ATP-binding cassette transporter
EOG0916035U	Aedes aegypti	7159:001474	AAEL005460	26	0	26	27	26	0.7475	Q17A03	Similarity:Belongs to the glycosyl hydrolase 27 family.
EOG091601FC	Aedes aegypti	7159:001b4c	AAEL007305	26	1	27	27	28	0.7476	Q172S0	Transmembrane:Helical
EOG091604I2	Aedes aegypti	7159:002256	AAEL009185	25	1	26	27	27	0.7476	Q1HR67	Similarity:Belongs to the ATP:guanido phosphotransferase family.
EOG091607N6	Aedes aegypti	7159:0016a7	AAEL006055	25	1	26	27	27	0.7481	Q177Q6	potassium channel interacting protein
EOG091601J2	Aedes aegypti	7159:003abf	AAEL017204	27	0	27	27	27	0.7482	NA	NA
EOG09160GY8	Aedes aegypti	7159:000387	AAEL000966	2	0	2	27	2	0.7484	Q17MP2	NA
EOG091607VZ	Aedes aegypti	7159:0008ae	AAEL002324	24	2	26	27	28	0.7485	Q16IH3	Vacuolar protein sorting-associated, VPS28
EOG091607VZ	Aedes aegypti	7159:00331c	AAEL013658	24	2	26	27	28	0.7485	Q16IH3	Vacuolar protein sorting-associated, VPS28
EOG09160BLS	Aedes aegypti	7159:0030d8	AAEL013061	25	0	25	27	25	0.7486	Q16KA7	SM protein G, putative
EOG0916038U	Aedes aegypti	7159:00303f	AAEL012904	25	1	26	27	27	0.7487	Q16KQ6	rab gdp-dissociation inhibitor
EOG09160B4M	Aedes aegypti	7159:000040	AAEL000068	21	1	22	27	23	0.7487	Q0C781	ribosomal protein S25, putative
EOG09160B4M	Aedes aegypti	7159:002797	AAEL010573	21	1	22	27	23	0.7487	Q16SG6	ribosomal protein S25, putative
EOG091607KN	Aedes aegypti	7159:00052c	AAEL001405	22	0	22	27	22	0.7488	Q17L95	clathrin coat assembly protein
EOG0916099M	Aedes aegypti	7159:000e5d	AAEL003835	24	2	26	27	28	0.7488	Q1HRN6	Eukaryotic translation initiation factor 5A
EOG09160B84	Aedes aegypti	7159:000d10	AAEL003492	19	0	19	27	19	0.7491	Q1HRK4	Transmembrane:Helical
EOG09160891	Aedes aegypti	7159:001c02	AAEL007494	24	3	27	27	30	0.7492	Q171Z1	calcineurin b subunit
EOG09160891	Aedes aegypti	7159:003964	AAEL015549	24	3	27	27	30	0.7492	Q1DGP4	calcineurin b subunit
EOG091603LB	Aedes aegypti	7159:000ca7	AAEL003383	24	1	25	27	26	0.7496	Q17FM1	Similarity:Belongs to the actin family.
EOG091603LB	Aedes aegypti	7159:0038c0	AAEL015309	24	1	25	27	26	0.7496	Q16EA2	Similarity:Belongs to the actin family.
EOG091605ZK	Aedes aegypti	7159:003650	AAEL014562	26	0	26	27	26	0.7496	Q1HRI6	Similarity:Belongs to the ribosomal protein L11P family.
EOG091606MK	Aedes aegypti	7159:002eea	PCNA	26	0	26	27	26	0.7496	Q4PKD7	Proliferating cell nuclear antigen
EOG09160AK2	Aedes aegypti	7159:003338	AAEL013700	26	0	26	27	26	0.7497	Q16IF1	DNA-directed RNA polymerase II 13.3 kDa polypeptide
EOG091607IP	Aedes aegypti	7159:00017c	AAEL000410	22	1	23	27	24	0.7499	Q17PC5	Similarity:Belongs to the EMP24/GP25L family.
EOG09160BP4	Aedes aegypti	7159:001f69	AAEL008394	20	0	20	27	20	0.7499	Q16YX8	Transmembrane:Helical
EOG0916034C	Aedes aegypti	7159:000b16	AAEL002956	25	2	27	27	29	0.7501	Q17GM7	Probable citrate synthase 1, mitochondrial
EOG0916034C	Aedes aegypti	7159:002c1b	AAEL011789	25	2	27	27	29	0.7501	Q16P20	Probable citrate synthase 2, mitochondrial
EOG091603E3	Aedes aegypti	7159:00134d	AAEL005148	25	0	25	27	25	0.7503	Q17AY7	Similarity:Contains TTL domain.
EOG09160845	Aedes aegypti	7159:000739	AAEL001946	26	0	26	27	26	0.7503	Q17JP0	Similarity:Contains 5 LIM zinc-binding domains.
EOG091601IT	Aedes aegypti	7159:001087	AAEL004419	27	0	27	27	27	0.7508	Q17CT5	Similarity:Contains helicase ATP-binding domain.
EOG091609Q2	Aedes aegypti	7159:001ee4	AAEL008255	18	0	18	27	18	0.7508	Q16ZB8	mbp-1 interacting protein-2a
EOG091607NX	Aedes aegypti	7159:001111	AAEL004559	24	1	25	27	26	0.7509	Q17CJ4	Synaptosomal-associated protein
EOG0916097O	Aedes aegypti	7159:0011e5	AAEL004779	19	1	20	27	21	0.7511	Q17BY9	Peptidyl-prolyl cis-trans isomerase
EOG091600NA	Aedes aegypti	7159:003d62	AAEL018306	26	0	26	27	26	0.7512	NA	NA
EOG09160866	Aedes aegypti	7159:001cda	AAEL007719	3	23	26	27	50	0.7512	Q0IEY7	Similarity:Contains 2 LIM zinc-binding domains.
EOG09160866	Aedes aegypti	7159:003c4a	AAEL018008	3	23	26	27	50	0.7512	NA	NA
EOG091608UP	Aedes aegypti	7159:0019e8	AAEL006922	26	0	26	27	26	0.7513	Q1HR19	Transgelin
EOG09160987	Aedes aegypti	7159:002569	AAEL010002	18	1	19	27	20	0.7513	Q1DGM3	Transmembrane:Helical
EOG09160987	Aedes aegypti	7159:003978	AAEL015575	18	1	19	27	20	0.7513	Q1DGM3	Transmembrane:Helical
EOG09160BIB	Aedes aegypti	7159:003028	AAEL012879	4	1	5	27	6	0.7513	Q16KU1	PBX
EOG091603RI	Aedes aegypti	7159:002997	AAEL011117	27	0	27	27	27	0.7514	Q16QZ8	Histone deacetylase
EOG091604FV	Aedes aegypti	7159:000b3c	AAEL002995	27	0	27	27	27	0.7514	Q17GI8	pyrazinamidase/nicotinamidase
EOG09160A5E	Aedes aegypti	7159:00161c	AAEL005909	22	1	23	27	24	0.7515	Q0IFB6	splicing factor SC35, putative
EOG09160BOA	Aedes aegypti	7159:0001ed	AAEL000529	18	1	19	27	21	0.7515	Q1HR25	40S ribosomal protein S21
EOG09160BOA	Aedes aegypti	7159:0010d9	AAEL004503	18	1	19	27	21	0.7515	Q1HR25	40S ribosomal protein S21
EOG09160BOA	Aedes aegypti	7159:0034fb	AAEL014189	18	1	19	27	21	0.7515	Q16H14	Ribosomal protein S21e
EOG091603FB	Aedes aegypti	7159:0022f0	AAEL009345	24	2	26	27	28	0.7516	Q1HR13	prohibitin
EOG091608T8	Aedes aegypti	7159:00114e	AAEL004620	26	1	27	27	28	0.7516	Q17CA9	sorting nexin
EOG091604D1	Aedes aegypti	7159:00117a	AAEL004668	24	2	26	27	29	0.7517	Q17C73	Similarity:Belongs to the TRAFAC class TrmE-Era-EngA-EngB-Septin-like GTPase superfamily. Septin GTPase family.
EOG091603A0	Aedes aegypti	7159:00118c	pont	25	0	25	27	25	0.7519	Q0IFL2	Pontin
EOG0916082Q	Aedes aegypti	7159:000ffb	AAEL004269	25	0	25	27	25	0.7519	Q17DD3	hippocalcin
EOG091603EI	Aedes aegypti	7159:0026b7	rept	25	1	26	27	27	0.752	Q16TA2	Reptin
EOG091607HP	Aedes aegypti	7159:000ee5	AAEL003972	26	1	27	27	28	0.7522	Q17E48	PPPDE putative peptidase domain
EOG09160A1B	Aedes aegypti	7159:000fa4	AAEL004175	24	0	24	27	24	0.7523	Q52UT2	40S ribosomal protein S17
EOG091608FH	Aedes aegypti	7159:001803	AAEL006420	24	1	25	27	26	0.7524	Q0IF89	Programmed cell death protein 10
EOG091609AG	Aedes aegypti	7159:001838	AAEL006473	22	0	22	27	22	0.7524	Q176A9	arginine/serine-rich splicing factor
EOG0916005R	Aedes aegypti	7159:00022c	AAEL000597	25	1	26	27	27	0.7525	Q17NP6	Function:Cadherins are calcium-dependent cell adhesion proteins.
EOG091602LB	Aedes aegypti	7159:0025a6	AAEL010063	26	1	27	27	28	0.7527	Q16U15	T-complex protein 1 subunit gamma
EOG091602I6	Aedes aegypti	7159:002711	AAEL010433	24	1	25	27	26	0.7529	Q16T04	groucho protein
EOG091605ZA	Aedes aegypti	7159:0020c1	AAEL008755	25	0	25	27	25	0.7529	Q16XU4	DNA-directed RNA polymerase II subunit
EOG091608LU	Aedes aegypti	7159:00215c	AAEL008921	18	3	21	27	24	0.7532	Q16XC2	myosin regulatory light chain 2 smooth muscle
EOG091608U8	Aedes aegypti	7159:002440	AAEL009694	18	0	18	27	18	0.7533	Q16V44	Similarity:Contains 1 KH domain.
EOG09160CDX	Aedes aegypti	7159:000b38	AAEL002991	17	0	17	27	17	0.7533	Q17GI7	Transmembrane:Helical
EOG0916044A	Aedes aegypti	7159:0011be	AAEL004738	26	1	27	27	28	0.7535	Q17BZ1	Peptidase M
EOG091603MR	Aedes aegypti	7159:000962	AAEL002508	20	7	27	27	34	0.7536	Q17HZ7	Similarity:Belongs to the AAA ATPase family.
EOG091604IL	Aedes aegypti	7159:002d0f	AAEL012046	22	4	26	27	30	0.7538	Q16N99	flotillin-1
EOG091604IL	Aedes aegypti	7159:00387d	AAEL015235	22	4	26	27	30	0.7538	Q16EE7	flotillin-1
EOG0916034B	Aedes aegypti	7159:001632	AAEL005931	27	0	27	27	27	0.754	Q178E4	6-phosphogluconate dehydrogenase, decarboxylating
EOG091604TL	Aedes aegypti	7159:003a00	AAEL017004	26	1	27	27	28	0.754	NA	NA
EOG091607BJ	Aedes aegypti	7159:0016ad	AAEL006061	27	0	27	27	27	0.754	Q177R1	Proteasome subunit alpha type
EOG091607F4	Aedes aegypti	7159:003832	AAEL015111	8	0	8	27	8	0.754	Q16EL3	Similarity:Contains homeobox DNA-binding domain.
EOG0916058T	Aedes aegypti	7159:001493	AAEL005493	25	1	26	27	27	0.7541	Q179W2	Similarity:Belongs to the TRAFAC class TrmE-Era-EngA-EngB-Septin-like GTPase superfamily. Septin GTPase family.
EOG09160ACO	Aedes aegypti	7159:000937	AAEL002464	25	0	25	27	25	0.7541	Q1HQK8	Vacuolar proton pump subunit F
EOG091601OZ	Aedes aegypti	7159:0027b9	AAEL010608	27	0	27	27	27	0.7544	Q16SE4	Succinate dehydrogenase (quinone)
EOG09160G1V	Aedes aegypti	7159:000743	AAEL001956	2	0	2	27	2	0.7544	Q17JN8	Similarity:Contains 1 LIM zinc-binding domain.
EOG091607CL	Aedes aegypti	7159:0026d7	AAEL010373	25	2	27	27	29	0.7547	Q16T51	Similarity:Contains FCP1 homology domain.
EOG091604MV	Aedes aegypti	7159:001f5b	AAEL008379	21	3	24	27	27	0.7548	Q16YY2	Mitogen-activated protein kinase
EOG09160882	Aedes aegypti	7159:002380	AAEL009496	23	0	23	27	23	0.7552	Q0IEM1	40S ribosomal protein S7
EOG09160B8G	Aedes aegypti	7159:000319	AAEL000852	25	0	25	27	25	0.7552	Q17N54	peptidyl-prolyl cis/trans isomerase, putative
EOG091600EJ	Aedes aegypti	7159:000a28	AAEL002709	26	1	27	27	28	0.7555	Q17HE5	spliceosomal protein sap
EOG091600EJ	Aedes aegypti	7159:003917	AAEL015441	26	1	27	27	28	0.7555	Q1DGX2	spliceosomal protein sap
EOG09160B7N	Aedes aegypti	7159:002d9c	AAEL012191	17	2	19	27	21	0.7555	Q16MU2	Transmembrane:Helical
EOG09160B7N	Aedes aegypti	7159:002e60	AAEL012396	17	2	19	27	21	0.7555	Q16M85	NA
EOG091608IS	Aedes aegypti	7159:001967	AAEL006785	24	1	25	27	26	0.7556	Q174U2	60S ribosomal protein L18a
EOG0916009P	Aedes aegypti	7159:001c45	DUOX	27	0	27	27	27	0.7558	Q171Q3	Similarity:Contains FAD-binding FR-type domain.
EOG091602LN	Aedes aegypti	7159:0028c9	AAEL010896	25	0	25	27	25	0.7559	Q16RP1	Similarity:Contains CTLH domain.
EOG091603U6	Aedes aegypti	7159:0012b1	PGK	24	1	25	27	26	0.7559	Q8WQL0	Phosphoglycerate kinase
EOG091606PG	Aedes aegypti	7159:00039b	AAEL000987	26	0	26	27	26	0.756	Q1HR32	60S ribosomal protein L8
EOG091608ED	Aedes aegypti	7159:002d59	AAEL012123	24	1	25	27	26	0.7562	Q16HD0	Transmembrane:Helical
EOG091608ED	Aedes aegypti	7159:00348f	AAEL014068	24	1	25	27	26	0.7562	Q16HD0	Transmembrane:Helical
EOG091604BW	Aedes aegypti	7159:0017cb	AAEL006363	23	1	24	27	25	0.7563	Q176H6	ribose-phosphate pyrophosphokinase 1,2
EOG091604I4	Aedes aegypti	7159:000bb1	AAEL003116	23	2	25	27	27	0.7564	Q17GC6	phosrestin i (arrestin b) (arrestin 2)
EOG091609RK	Aedes aegypti	7159:0013ad	AAEL005247	25	1	26	27	27	0.7566	Q17AN8	Similarity:Contains homeobox DNA-binding domain.
EOG091602U2	Aedes aegypti	7159:000c9e	AAEL003371	26	1	27	27	28	0.7567	Q17FK5	Similarity:Contains 1 F-box domain.
EOG091608CL	Aedes aegypti	7159:00193d	AAEL006743	27	0	27	27	27	0.7568	Q1HQZ2	n-terminal acetyltransferase complex ard1 subunit
EOG0916070E	Aedes aegypti	7159:0015d3	AAEL005830	23	0	23	27	23	0.7571	Q178M6	Proteasome subunit alpha type
EOG09160AD5	Aedes aegypti	7159:001910	RpL31	23	0	23	27	23	0.7571	Q9GN74	60S ribosomal protein L31
EOG09160AF8	Aedes aegypti	7159:00238a	AAEL009506	25	0	25	27	25	0.7571	Q1HRS9	40S ribosomal protein S20
EOG09160C4L	Aedes aegypti	7159:00242b	AAEL009671	22	0	22	27	22	0.7572	Q16V68	snrnp sm protein
EOG091606TP	Aedes aegypti	7159:000cc2	AAEL003412	24	0	24	27	24	0.7573	Q17FD5	Similarity:Contains FCP1 homology domain.
EOG09160749	Aedes aegypti	7159:0008e2	AAEL002377	14	13	27	27	41	0.7573	Q1HQD9	Small nuclear ribonucleoprotein-associated protein
EOG09160749	Aedes aegypti	7159:00257a	AAEL010019	14	13	27	27	41	0.7573	Q16F98	Histone-fold
EOG09160749	Aedes aegypti	7159:00374f	AAEL014850	14	13	27	27	41	0.7573	Q16F98	Histone-fold
EOG0916023F	Aedes aegypti	7159:002bca	AAEL011704	16	10	26	27	40	0.7574	Q16FA5	heat shock protein
EOG0916023F	Aedes aegypti	7159:002bce	AAEL011708	16	10	26	27	40	0.7574	Q16PB5	heat shock protein
EOG0916023F	Aedes aegypti	7159:003748	AAEL014843	16	10	26	27	40	0.7574	Q16FA5	heat shock protein
EOG091600CO	Aedes aegypti	7159:000d7f	AAEL003605	15	8	23	27	33	0.7579	Q17F20	U2 small nuclear ribonucleoprotein, putative
EOG09160D4X	Aedes aegypti	7159:00114a	AAEL004616	2	0	2	27	2	0.7579	Q17C86	Similarity:Belongs to the actin family.
EOG091603QU	Aedes aegypti	7159:0001a5	AAEL000454	26	1	27	27	28	0.758	Q17P79	Isocitrate dehydrogenase
EOG0916011T	Aedes aegypti	7159:001b57	AAEL007316	24	1	25	27	26	0.7582	Q172P2	Similarity:Contains 1 LIM zinc-binding domain.
EOG0916017L	Aedes aegypti	7159:000dfc	AAEL003734	25	1	26	27	27	0.7584	Q17EL3	Aconitate hydratase, mitochondrial
EOG0916017L	Aedes aegypti	7159:003038	AAEL012897	25	1	26	27	27	0.7584	Q16KR4	Aconitate hydratase, mitochondrial
EOG09160770	Aedes aegypti	7159:002550	AAEL009974	22	1	23	27	24	0.7584	Q16UA3	Similarity:Belongs to the small GTPase superfamily. Rab family.
EOG091601BG	Aedes aegypti	7159:000177	AAEL000404	24	1	25	27	26	0.7588	Q0IGE4	Catalytic Activity:ATP + H(2)O = ADP + phosphate.
EOG09160BRC	Aedes aegypti	7159:001094	AAEL004432	20	0	20	27	20	0.7589	Q17CT9	Homeobox domain
EOG0916020L	Aedes aegypti	7159:003b4b	AAEL017349	24	2	26	27	28	0.759	NA	NA
EOG0916020L	Aedes aegypti	7159:003c76	AAEL018061	24	2	26	27	28	0.759	NA	NA
EOG091603N5	Aedes aegypti	7159:00070f	AAEL001904	26	0	26	27	26	0.7591	Q17JV8	arp2/3
EOG0916017S	Aedes aegypti	7159:001243	AAEL004875	23	3	26	27	29	0.7593	Q17BQ9	Similarity:Contains 1 F-box domain.
EOG091602NB	Aedes aegypti	7159:000429	AAEL001134	25	0	25	27	25	0.7593	Q17M80	Probable methylmalonate-semialdehyde dehydrogenase
EOG091605K0	Aedes aegypti	7159:001e9d	AAEL008184	26	0	26	27	26	0.7593	Q16ZL3	Similarity:Contains RING-type zinc finger.
EOG091603AA	Aedes aegypti	7159:00062b	AAEL001668	26	1	27	27	28	0.7595	Q17KK5	Active Site:Proton acceptor
EOG091603EG	Aedes aegypti	7159:002bee	AAEL011742	25	1	26	27	27	0.7595	Q16P70	eukaryotic peptide chain release factor subunit
EOG091600HR	Aedes aegypti	7159:00243d	AAEL009691	22	5	27	27	32	0.7597	Q16V52	Pyruvate carboxylase
EOG091606UT	Aedes aegypti	7159:000908	AAEL002417	22	1	23	27	24	0.7598	Q17I94	troponin t, invertebrate
EOG091602N3	Aedes aegypti	7159:003d64	AAEL018308	23	1	24	27	26	0.7599	NA	NA
EOG09160C9O	Aedes aegypti	7159:002f6d	AAEL012684	9	0	9	27	9	0.76	Q1HR68	Transmembrane:Helical
EOG091603Z6	Aedes aegypti	7159:002f91	AAEL012723	22	1	23	27	24	0.7601	Q16L96	mitogen activated protein kinase kinase 2, mapkk2, mek2
EOG091606YN	Aedes aegypti	7159:0016b6	AAEL006070	26	1	27	27	28	0.7601	Q177P3	phosphoglycerate mutase
EOG091602SG	Aedes aegypti	7159:003b5e	AAEL017368	25	0	25	27	25	0.7603	NA	NA
EOG091604MG	Aedes aegypti	7159:0013bb	AAEL005262	27	0	27	27	27	0.7604	Q17AK3	Transmembrane:Helical
EOG0916076S	Aedes aegypti	7159:002230	AAEL009145	22	0	22	27	22	0.7607	Q16WP6	splicing factor pTSR1, putative
EOG091609I1	Aedes aegypti	7159:001530	AAEL005663	26	0	26	27	26	0.7607	Q179F4	centrin
EOG091607P8	Aedes aegypti	7159:002182	AAEL008959	25	0	25	27	25	0.7609	Q16XA1	Similarity:Belongs to the small GTPase superfamily. Rab family.
EOG09160C66	Aedes aegypti	7159:000e0b	AAEL003749	23	1	24	27	25	0.761	Q0IFZ5	Transcription elongation factor 1
EOG09160B4E	Aedes aegypti	7159:00121b	AAEL004835	24	1	25	27	26	0.7611	Q0IFI2	Similarity:Contains 1 PDZ (DHR) domain.
EOG09160B4E	Aedes aegypti	7159:001232	AAEL004858	24	1	25	27	26	0.7611	Q0IFI2	Similarity:Contains 1 PDZ (DHR) domain.
EOG091603D2	Aedes aegypti	7159:00015d	AAEL000378	26	0	26	27	26	0.7612	Q17PJ5	Similarity:Contains 3 ANK repeats.
EOG09160583	Aedes aegypti	7159:00272d	AAEL010465	22	0	22	27	22	0.7612	Q16SV5	gpi-anchor transamidase
EOG09160803	Aedes aegypti	7159:0032fd	AAEL013625	25	1	26	27	27	0.7613	Q1HRT9	Similarity:Belongs to the ribosomal protein S7P family.
EOG09160BVY	Aedes aegypti	7159:001d45	AAEL007831	12	1	13	27	14	0.7613	Q170Q2	Homeobox, conserved site
EOG09160APQ	Aedes aegypti	7159:000009	AAEL000010	24	1	25	27	26	0.7615	Q1HR17	60S ribosomal protein L36
EOG09160APQ	Aedes aegypti	7159:0009e2	AAEL002639	24	1	25	27	26	0.7615	Q17HK5	60S ribosomal protein L36
EOG09160BMD	Aedes aegypti	7159:0032c9	AAEL013571	10	17	27	27	46	0.7615	Q16IR6	Transmembrane:Helical
EOG09160C45	Aedes aegypti	7159:003032	AAEL012891	11	1	12	27	13	0.7615	Q16KR9	TFIIH subunit TTDA/Tfb5
EOG09160C45	Aedes aegypti	7159:00303b	AAEL012900	11	1	12	27	13	0.7615	Q16KR6	TFIIH subunit TTDA/Tfb5
EOG09160BR0	Aedes aegypti	7159:002989	AAEL011101	25	0	25	27	25	0.7616	Q16R31	Domain of unknown function DUF1777
EOG09160217	Aedes aegypti	7159:0011d0	AAEL004757	26	0	26	27	26	0.7618	Q17BY3	cleavage and polyadenylation specificity factor
EOG09160A72	Aedes aegypti	7159:0018ed	AAEL006661	23	1	24	27	25	0.7618	Q175I0	histone acetyltransferase, putative
EOG091604R6	Aedes aegypti	7159:00105a	AAEL004371	27	0	27	27	27	0.762	Q17D09	SWI/SNF related matrix associated actin dependent regulator of chromatin subfamily B member 1
EOG09160339	Aedes aegypti	7159:0014b1	AAEL005524	25	0	25	27	25	0.7621	Q179S1	Adenosylhomocysteinase
EOG0916094F	Aedes aegypti	7159:001301	AAEL005069	25	0	25	27	25	0.7623	Q17B74	Similarity:Belongs to the small GTPase superfamily. Rab family.
EOG091609D2	Aedes aegypti	7159:001a69	AAEL007061	15	0	15	27	15	0.7624	Q173P2	Peptidyl-prolyl cis-trans isomerase
EOG0916018V	Aedes aegypti	7159:002df6	AAEL012285	22	2	24	27	26	0.7626	Q16MJ3	Similarity:Contains 1 BTB (POZ) domain.
EOG0916018V	Aedes aegypti	7159:00341c	AAEL013953	22	2	24	27	26	0.7626	Q16HP9	Similarity:Contains 1 BTB (POZ) domain.
EOG0916050H	Aedes aegypti	7159:00103b	AAEL004338	26	0	26	27	26	0.7626	Q17D51	pyruvate dehydrogenase
EOG091607R5	Aedes aegypti	7159:0016ca	AAEL006091	25	1	26	27	27	0.7632	Q177M1	Similarity:Belongs to the small GTPase superfamily. Rab family.
EOG09160286	Aedes aegypti	7159:001f8c	AAEL008432	23	4	27	27	31	0.7633	Q16YT6	Similarity:Belongs to the sodium:solute symporter (SSF) (TC 2.A.21) family.
EOG091608MR	Aedes aegypti	7159:003111	AAEL013121	25	0	25	27	25	0.7634	Q16K39	zeta-coat protein
EOG091602ZJ	Aedes aegypti	7159:00149c	AAEL005502	25	1	26	27	27	0.7635	Q179U7	Kinesin light chain
EOG091602ZJ	Aedes aegypti	7159:002ea8	AAEL012472	25	1	26	27	27	0.7635	Q16LZ3	kinesin light chain 1 and
EOG091603W7	Aedes aegypti	7159:002d58	AAEL012122	24	1	25	27	26	0.7636	Q16N14	Similarity:Contains PCI domain.
EOG091607L5	Aedes aegypti	7159:00171b	AAEL006174	26	0	26	27	26	0.7636	Q177C2	Proteasome subunit beta type
EOG0916050B	Aedes aegypti	7159:000af7	AAEL002924	22	3	25	27	28	0.7637	Q17GN9	Armadillo-like helical
EOG09160C9I	Aedes aegypti	7159:00041b	AAEL001120	16	0	16	27	16	0.7637	Q17M56	Diacylglycerol/phorbol-ester binding
EOG09160A9A	Aedes aegypti	7159:003366	AAEL013746	24	0	24	27	24	0.7638	Q16IA1	Golgin subfamily A member 7/ERF4
EOG091605YM	Aedes aegypti	7159:000d2d	AAEL003521	4	1	5	27	6	0.7639	Q0IG48	Transmembrane:Helical
EOG091606EJ	Aedes aegypti	7159:001d00	AAEL007761	24	0	24	27	24	0.7639	Q170X6	chloride intracellular channel
EOG0916076F	Aedes aegypti	7159:00209e	AAEL008720	25	1	26	27	27	0.7641	Q16XZ5	Similarity:Contains 1 MADS-box domain.
EOG0916076F	Aedes aegypti	7159:0028e5	AAEL010926	25	1	26	27	27	0.7641	Q16RK2	Similarity:Contains 1 MADS-box domain.
EOG091609F9	Aedes aegypti	7159:000d63	AAEL003577	7	0	7	27	7	0.7643	Q17F57	CD80-like, immunoglobulin C2-set
EOG091608CU	Aedes aegypti	7159:00310f	AAEL013119	25	0	25	27	25	0.7645	Q16K46	charged multivesicular body protein
EOG091609UO	Aedes aegypti	7159:000cb3	AAEL003396	23	1	24	27	25	0.7646	Q1HR34	60S ribosomal protein L32
EOG091604JH	Aedes aegypti	7159:0029e4	AAEL011196	24	1	25	27	26	0.7647	Q16QR0	WD40 repeat
EOG091608QC	Aedes aegypti	7159:0001a8	AAEL000457	23	1	24	27	25	0.7649	Q17PB7	MORN motif
EOG091602BZ	Aedes aegypti	7159:000620	AAEL001657	21	1	22	27	23	0.7651	Q17KK8	Similarity:Belongs to the DEAD box helicase family.
EOG0916068Y	Aedes aegypti	7159:0012a2	AAEL004973	25	1	26	27	27	0.7652	Q17BE9	golgi phosphoprotein 3 (coat-protein GPP34)
EOG09160BPU	Aedes aegypti	7159:001f29	AAEL008329	20	1	21	27	22	0.7652	Q1HR85	60S ribosomal protein L24
EOG09160ACU	Aedes aegypti	7159:000f7d	MED31	22	0	22	27	22	0.7653	Q17DI7	Mediator complex subunit 31
EOG09160CJW	Aedes aegypti	7159:0010ce	AAEL004492	14	0	14	27	14	0.7653	Q0IFN1	Cyclin-dependent kinases regulatory subunit
EOG0916032Q	Aedes aegypti	7159:001e8c	AAEL008167	26	0	26	27	26	0.7654	Q16ZK9	aspartate ammonia lyase
EOG09160343	Aedes aegypti	7159:003c62	AAEL018039	24	2	26	27	28	0.7654	NA	NA
EOG091607AR	Aedes aegypti	7159:001020	AAEL004308	25	0	25	27	25	0.7656	Q1HQN1	Proteasome subunit alpha type
EOG091603IT	Aedes aegypti	7159:001f35	AAEL008341	20	7	27	27	34	0.7657	Q1HQR0	Adenosylhomocysteinase
EOG0916051Q	Aedes aegypti	7159:0004e4	AAEL001331	25	0	25	27	25	0.7658	Q1HQN5	mannose-1-phosphate guanyltransferase
EOG091607GC	Aedes aegypti	7159:002247	AAEL009170	17	2	19	27	21	0.7661	Q16WN4	six/sine homebox transcription factors
EOG091607GC	Aedes aegypti	7159:0034d6	AAEL014151	17	2	19	27	21	0.7661	Q16H61	six/sine homebox transcription factors
EOG091604UQ	Aedes aegypti	7159:0005e0	AAEL001593	23	1	24	27	25	0.7662	Q17KS3	Glycerol-3-phosphate dehydrogenase
EOG09160AMM	Aedes aegypti	7159:002474	AAEL009747	26	0	26	27	26	0.7662	Q1HRL8	Similarity:Belongs to the ribosomal protein S13P family.
EOG09160BLC	Aedes aegypti	7159:000714	AAEL001909	20	1	21	27	22	0.7663	Q17JV7	mitochondrial ribosomal protein, S21, putative
EOG09160760	Aedes aegypti	7159:001b60	AAEL007325	23	0	23	27	23	0.7664	Q172N3	Mob3B protein, putative
EOG091600ZJ	Aedes aegypti	7159:0026e5	AAEL010387	25	1	26	27	27	0.7666	Q16T65	pre-mRNA splicing factor
EOG091602TN	Aedes aegypti	7159:0033e5	AAEL013881	27	0	27	27	27	0.7666	Q16HW4	voltage-dependent calcium channel
EOG091608Z1	Aedes aegypti	7159:003560	AAEL014292	23	2	25	27	28	0.7666	Q8WQK7	40S ribosomal protein S24
EOG091608Z1	Aedes aegypti	7159:003780	AAEL014903	23	2	25	27	28	0.7666	Q8WQK7	40S ribosomal protein S24
EOG0916021V	Aedes aegypti	7159:002cf1	AAEL012016	21	3	24	27	30	0.7667	Q16NC8	Transmembrane:Helical
EOG0916021V	Aedes aegypti	7159:002ffa	AAEL012833	21	3	24	27	30	0.7667	Q16KY5	Transmembrane:Helical
EOG091602XM	Aedes aegypti	7159:002165	AAEL008930	22	2	24	27	26	0.7668	Q16XB2	Serine/threonine-protein phosphatase
EOG091605PL	Aedes aegypti	7159:000048	AAEL000076	20	2	22	27	24	0.7668	Q16SG3	rRNA adenine N(6)-methyltransferase
EOG091605PL	Aedes aegypti	7159:002799	AAEL010575	20	2	22	27	24	0.7668	Q16SG3	rRNA adenine N(6)-methyltransferase
EOG0916077D	Aedes aegypti	7159:00296b	CTLGA3	26	0	26	27	26	0.7668	Q1HRD1	Similarity:Contains C-type lectin domain.
EOG091600V1	Aedes aegypti	7159:000ee1	AAEL003968	25	2	27	27	29	0.767	Q17E28	helicase
EOG09160C58	Aedes aegypti	7159:003d7f	AAEL018336	19	0	19	27	19	0.767	NA	NA
EOG091600CS	Aedes aegypti	7159:001dfd	AAEL008021	23	4	27	27	32	0.7671	Q16ZZ3	specifically Rac-associated protein, putative
EOG09160CAZ	Aedes aegypti	7159:003669	AAEL014590	17	1	18	27	19	0.7671	Q16FY7	Immunoglobulin-like domain
EOG091606PA	Aedes aegypti	7159:0018bb	AAEL006611	26	0	26	27	26	0.7672	Q175K6	Transmembrane:Helical
EOG091607RF	Aedes aegypti	7159:001d05	AAEL007766	25	1	26	27	27	0.7672	Q0IEW6	ras GTPase, putative
EOG09160CCI	Aedes aegypti	7159:003665	AAEL014583	24	1	25	27	27	0.7673	Q16FZ1	60S acidic ribosomal protein P2
EOG091603EV	Aedes aegypti	7159:00090b	AAEL002420	26	0	26	27	26	0.7674	Q17IB2	Pellino family
EOG091608UN	Aedes aegypti	7159:0002ca	AAEL000769	21	2	23	27	25	0.7674	Q17N77	arginine/serine-rich splicing factor
EOG091608UN	Aedes aegypti	7159:002f2f	AAEL012621	21	2	23	27	25	0.7674	Q16LJ8	arginine/serine-rich splicing factor
EOG09160BG7	Aedes aegypti	7159:001c0d	AAEL007505	8	17	25	27	42	0.7674	Q171W8	Similarity:Contains homeobox DNA-binding domain.
EOG0916002P	Aedes aegypti	7159:00047a	ck	26	1	27	27	28	0.7675	Q17LW0	Protein crinkled
EOG091602NG	Aedes aegypti	7159:0024cb	Cbp80	27	0	27	27	27	0.7676	Q16UN6	80 kDa nuclear cap-binding protein
EOG091600OB	Aedes aegypti	7159:0001c3	AAEL000486	23	2	25	27	27	0.7677	Q17P26	Similarity:Belongs to the TCP-1 chaperonin family.
EOG09160AZT	Aedes aegypti	7159:001d78	AAEL007883	25	0	25	27	25	0.7677	Q1HR83	Peptidyl-prolyl cis-trans isomerase
EOG091602S5	Aedes aegypti	7159:001ab6	AAEL007143	16	10	26	27	36	0.7678	Q173H7	Transmembrane:Helical
EOG091602S5	Aedes aegypti	7159:001ab9	AAEL007146	16	10	26	27	36	0.7678	Q173H8	Transmembrane:Helical
EOG091604MW	Aedes aegypti	7159:00204e	AAEL008634	20	5	25	27	30	0.7678	Q16Y83	Mitogen-activated protein kinase
EOG091605QQ	Aedes aegypti	7159:00141d	AAEL005368	21	4	25	27	29	0.7678	Q17AB8	Cyclin-like
EOG0916063W	Aedes aegypti	7159:001ca4	AAEL007661	26	0	26	27	26	0.7678	Q171G7	Similarity:Belongs to the small GTPase superfamily. Rab family.
EOG091607KJ	Aedes aegypti	7159:00210c	AAEL008837	27	0	27	27	27	0.7678	Q16XJ8	Similarity:Belongs to the ubiquitin-conjugating enzyme family.
EOG091600NB	Aedes aegypti	7159:000575	AAEL001484	27	0	27	27	27	0.7679	Q17L27	chromosome region maintenance protein 1/exportin
EOG091600SJ	Aedes aegypti	7159:001259	AAEL004897	26	0	26	27	26	0.7679	Q17BM9	brain chitinase and chia
EOG09160973	Aedes aegypti	7159:002e3d	AAEL012359	26	0	26	27	26	0.7679	Q16MB4	Nucleoside diphosphate kinase
EOG091603HJ	Aedes aegypti	7159:00339f	AAEL013808	27	0	27	27	27	0.768	Q16I34	Fascin
EOG0916012G	Aedes aegypti	7159:001b3b	AAEL007288	27	0	27	27	27	0.7683	Q172Q5	Similarity:Belongs to the TRAFAC class dynamin-like GTPase superfamily. Dynamin/Fzo/YdjA family.
EOG091608HF	Aedes aegypti	7159:0032f8	AAEL013620	27	0	27	27	27	0.7683	Q1HQU3	Similarity:Belongs to the small GTPase superfamily. Rab family.
EOG09160422	Aedes aegypti	7159:000b05	AAEL002938	22	4	26	27	30	0.7686	Q17GP3	Similarity:Belongs to the AAA ATPase family.
EOG091604IB	Aedes aegypti	7159:001e52	AAEL008109	6	21	27	27	48	0.7686	Q0IES7	Protein mab-21-like
EOG091604IB	Aedes aegypti	7159:001e5b	mab-21	6	21	27	27	48	0.7686	Q0IES8	Protein mab-21
EOG091608F9	Aedes aegypti	7159:00230a	AAEL009373	23	0	23	27	23	0.7686	Q16W01	n-acetyltransferase
EOG091609J3	Aedes aegypti	7159:0020c9	AAEL008763	23	1	24	27	25	0.7686	Q16XU3	tata-binding protein-associated phosphoprotein (dr1)
EOG09160CWE	Aedes aegypti	7159:0019ab	AAEL006861	6	0	6	27	6	0.7686	Q174J7	NA
EOG091601C7	Aedes aegypti	7159:003d7d	AAEL018334	24	1	25	27	26	0.7689	NA	NA
EOG091608UO	Aedes aegypti	7159:000579	AAEL001488	24	1	25	27	26	0.7689	Q17L12	Ribosomal protein L15
EOG091608UO	Aedes aegypti	7159:002f9e	AAEL012736	24	1	25	27	26	0.7689	Q16L79	Ribosomal protein L15
EOG091606X8	Aedes aegypti	7159:000a6c	AAEL002780	23	2	25	27	27	0.769	Q17H61	Chitin binding domain
EOG091606X8	Aedes aegypti	7159:002f96	AAEL012728	23	2	25	27	27	0.769	Q16L88	Chitin binding domain
EOG09160BIQ	Aedes aegypti	7159:003a19	AAEL017030	23	0	23	27	23	0.769	NA	NA
EOG091601RL	Aedes aegypti	7159:000fce	AAEL004221	27	0	27	27	27	0.7693	Q17DG0	glycogen synthase
EOG091602F0	Aedes aegypti	7159:0023e6	EcR	24	1	25	27	26	0.7693	P49880	20-hydroxy-ecdysone receptor
EOG091605AJ	Aedes aegypti	7159:001e89	AAEL008164	24	0	24	27	24	0.7693	Q16ZL1	Nucleotide-binding alpha-beta plait domain
EOG09160A5U	Aedes aegypti	7159:000738	AAEL001945	26	0	26	27	26	0.7694	Q17JQ8	Zinc finger, C2H2-like
EOG091605JO	Aedes aegypti	7159:001991	AAEL006833	26	0	26	27	26	0.7697	Q1HR33	Active Site:Tele-phosphohistidine intermediate
EOG09160B8Y	Aedes aegypti	7159:003a4a	AAEL017082	23	0	23	27	23	0.7697	NA	NA
EOG091601RB	Aedes aegypti	7159:00325a	AAEL013460	26	1	27	27	28	0.7698	Q16J34	ecotropic viral integration site
EOG091605HN	Aedes aegypti	7159:0026ac	AAEL010330	22	1	23	27	24	0.7698	Q16TA7	Succinate dehydrogenase
EOG091600B5	Aedes aegypti	7159:0013cf	AAEL005284	24	3	27	27	30	0.7699	Q17AI9	Protein-tyrosine-phosphatase
EOG091600XR	Aedes aegypti	7159:002c11	AAEL011778	24	1	25	27	26	0.7699	Q16P29	WD-repeat protein
EOG091600KS	Aedes aegypti	7159:00242f	AAEL009677	22	5	27	27	32	0.77	Q16V64	membrane-associated protein gex-3
EOG091600KS	Aedes aegypti	7159:002d7c	AAEL012159	22	5	27	27	32	0.77	Q16MV4	membrane-associated protein gex-3
EOG0916024Y	Aedes aegypti	7159:001b74	AAEL007345	23	4	27	27	31	0.7701	Q172L9	Similarity:Contains cyclic nucleotide-binding domain.
EOG0916024Y	Aedes aegypti	7159:003663	AAEL014581	23	4	27	27	31	0.7701	Q16FZ6	Transmembrane:Helical
EOG091604PZ	Aedes aegypti	7159:002275	AAEL009216	25	1	26	27	27	0.7701	Q16WG0	cAMP-dependent protein kinase type ii regulatory subunit
EOG091604PZ	Aedes aegypti	7159:0038c4	AAEL015314	25	1	26	27	27	0.7701	Q1DH15	cAMP-dependent protein kinase type ii regulatory subunit
EOG091600WR	Aedes aegypti	7159:001698	AAEL006040	25	2	27	27	29	0.7702	Q177S9	coatomer
EOG091607O4	Aedes aegypti	7159:001816	AAEL006439	27	0	27	27	27	0.7702	Q176D4	Similarity:Contains tyrosine-protein phosphatase domain.
EOG091606RA	Aedes aegypti	7159:002506	AAEL009898	27	0	27	27	27	0.7703	Q16UH5	Proteasome subunit alpha type
EOG09160846	Aedes aegypti	7159:000f8f	AAEL004152	27	0	27	27	27	0.7703	Q0IFU0	Similarity:Belongs to the ubiquitin-conjugating enzyme family.
EOG09160ADT	Aedes aegypti	7159:001728	AAEL006188	11	0	11	27	11	0.7704	Q177D4	Similarity:Contains CRIB domain.
EOG091604B6	Aedes aegypti	7159:001771	AAEL006265	26	0	26	27	26	0.7706	Q176R4	CIDE-N domain
EOG091601M8	Aedes aegypti	7159:00238e	AAEL009510	22	2	24	27	26	0.7707	Q95NQ3	glucosamine-fructose-6-phosphate aminotransferase
EOG091603I7	Aedes aegypti	7159:002e0f	AAEL012310	25	1	26	27	27	0.7708	Q16MG7	Similarity:Belongs to the actin family.
EOG091600LZ	Aedes aegypti	7159:0002e2	AAEL000795	5	14	19	27	67	0.7709	Q17N50	ubiquitin
EOG091600LZ	Aedes aegypti	7159:0008d9	AAEL002368	5	14	19	27	67	0.7709	Q17IF2	Ribosomal protein S27a
EOG091600LZ	Aedes aegypti	7159:000e87	AAEL003877	5	14	19	27	67	0.7709	Q17E98	ubiquitin
EOG091600LZ	Aedes aegypti	7159:000e8b	AAEL003881	5	14	19	27	67	0.7709	Q17EA1	ubiquitin, putative
EOG091600LZ	Aedes aegypti	7159:000e92	AAEL003888	5	14	19	27	67	0.7709	Q17EA0	ubiquitin
EOG091600LZ	Aedes aegypti	7159:00185c	AAEL006511	5	14	19	27	67	0.7709	Q7KF35	ubiquitin
EOG091600LZ	Aedes aegypti	7159:001acc	AAEL007168	5	14	19	27	67	0.7709	Q173F2	Ribosomal protein S27a
EOG091600LZ	Aedes aegypti	7159:00215b	AAEL008920	5	14	19	27	67	0.7709	Q16XC9	ubiquitin, putative
EOG091600LZ	Aedes aegypti	7159:0029fb	AAEL011219	5	14	19	27	67	0.7709	Q16QP5	Ribosomal protein S27a
EOG091600LZ	Aedes aegypti	7159:0032a6	AAEL013536	5	14	19	27	67	0.7709	Q16IV1	ubiquitin (ribosomal protein L40)
EOG091600LZ	Aedes aegypti	7159:003324	AAEL013680	5	14	19	27	67	0.7709	Q16IG7	Ribosomal protein S27a
EOG091600QM	Aedes aegypti	7159:002a97	AAEL011382	26	0	26	27	26	0.7713	Q16Q70	116 kda U5 small nuclear ribonucleoprotein component
EOG0916009O	Aedes aegypti	7159:000a83	AAEL002804	25	1	26	27	27	0.7716	Q17H36	Transmembrane:Helical
EOG0916009O	Aedes aegypti	7159:0037fa	AAEL015049	25	1	26	27	27	0.7716	Q16ER9	Transmembrane:Helical
EOG0916037T	Aedes aegypti	7159:003d13	AAEL018227	24	2	26	27	29	0.7716	NA	NA
EOG091603MQ	Aedes aegypti	7159:0036e0	AAEL014717	27	0	27	27	27	0.7718	Q16FL3	Transmembrane:Helical
EOG091604XR	Aedes aegypti	7159:001290	AAEL004952	24	2	26	27	28	0.7718	Q17BH8	protein N-terminal asparagine amidohydrolase, putative
EOG091606OO	Aedes aegypti	7159:000983	AAEL002542	27	0	27	27	27	0.7718	Q17HW3	Triosephosphate isomerase
EOG0916023Z	Aedes aegypti	7159:000409	AAEL001101	26	1	27	27	28	0.7719	Q17M52	Similarity:Belongs to the ABC transporter superfamily.
EOG0916015J	Aedes aegypti	7159:001bf9	AAEL007484	22	3	25	27	28	0.772	Q171Y9	protein transport protein sec23
EOG09160165	Aedes aegypti	7159:00181d	AAEL006446	27	0	27	27	27	0.772	Q176D3	trehalose-6-phosphate synthase
EOG0916069R	Aedes aegypti	7159:001b99	AAEL007386	21	2	23	27	25	0.772	Q172H0	Similarity:Belongs to the two pore domain potassium channel (TC 1.A.1.8) family.
EOG09160AEH	Aedes aegypti	7159:00095e	AAEL002503	19	3	22	27	25	0.772	Q17HY3	Protein yippee-like
EOG09160007	Aedes aegypti	7159:000e5f	AAEL003837	23	4	27	27	33	0.7722	Q17EB5	Transmembrane:Helical
EOG091609JQ	Aedes aegypti	7159:000cd1	RpS16	26	0	26	27	26	0.7722	P62251	40S ribosomal protein S16
EOG091602HG	Aedes aegypti	7159:00065a	AAEL001715	23	2	25	27	27	0.7723	Q17KD5	Similarity:Belongs to the TCP-1 chaperonin family.
EOG091604MM	Aedes aegypti	7159:002f54	AAEL012658	26	1	27	27	28	0.7727	Q16LF9	Similarity:Contains 1 PDZ (DHR) domain.
EOG09160AZV	Aedes aegypti	7159:000089	AAEL000145	14	1	15	27	16	0.7727	Q17Q49	NA
EOG091609PD	Aedes aegypti	7159:001e8e	AAEL008169	26	1	27	27	28	0.7728	Q16ZL7	Similarity:Belongs to the ribosomal protein S12P family.
EOG09160BYM	Aedes aegypti	7159:0005bf	AAEL001560	5	0	5	27	5	0.7728	Q17KW7	PAS domain
EOG091602HP	Aedes aegypti	7159:001507	AAEL005617	23	0	23	27	23	0.773	Q58I82	UTP-glucose-1-phosphate uridylyltransferase 2
EOG091602MU	Aedes aegypti	7159:000d3f	AAEL003539	26	0	26	27	26	0.773	Q0IG19	Similarity:Contains LisH domain.
EOG091605BZ	Aedes aegypti	7159:0018fb	AAEL006675	2	24	26	27	51	0.7732	Q175F4	RNA-binding protein, putative
EOG091605BZ	Aedes aegypti	7159:001fde	AAEL008516	2	24	26	27	51	0.7732	Q16YJ6	RNA-binding protein, putative
EOG091605BZ	Aedes aegypti	7159:002791	AAEL010567	2	24	26	27	51	0.7732	Q16SL1	Nucleotide-binding alpha-beta plait domain
EOG09160520	Aedes aegypti	7159:002d22	AAEL012065	27	0	27	27	27	0.7733	Q16N83	cytoplasmic polyadenylation element binding protein (cpeb)
EOG091604GP	Aedes aegypti	7159:0025ad	AAEL010070	24	1	25	27	26	0.7735	Q16TZ3	guanine nucleotide-binding protein beta 5 (g protein beta5)
EOG09160498	Aedes aegypti	7159:002597	AAEL010048	27	0	27	27	27	0.7736	Q16U24	Similarity:Contains PCI domain.
EOG091602B7	Aedes aegypti	7159:001a18	AAEL006977	26	1	27	27	28	0.7737	Q173Y9	serine/threonine protein phosphatase 2a regulatory subunit a
EOG091608WV	Aedes aegypti	7159:000d01	AAEL003477	22	3	25	27	28	0.7737	Q17FA3	Peptidyl-prolyl cis-trans isomerase
EOG091600GJ	Aedes aegypti	7159:0012ad	AAEL004984	27	0	27	27	27	0.7738	Q17BE8	cullin-associated NEDD8-dissociated protein 1
EOG09160981	Aedes aegypti	7159:001942	AAEL006748	22	0	22	27	22	0.7738	Q175A5	RNA-binding protein 8A
EOG091609P5	Aedes aegypti	7159:000831	AAEL002198	22	2	24	27	26	0.7738	Q1HQG5	Transmembrane:Helical
EOG091604UK	Aedes aegypti	7159:000f1f	AAEL004032	26	0	26	27	26	0.7741	Q17DY2	Similarity:Belongs to the ligand-gated ion channel (TC 1.A.9) family.
EOG091608AE	Aedes aegypti	7159:003c1c	AAEL017562	22	2	24	27	26	0.7741	NA	NA
EOG0916068C	Aedes aegypti	7159:002886	AAEL010821	20	0	20	27	20	0.7744	Q1HR99	Similarity:Belongs to the ribosomal protein L10P family.
EOG09160AW8	Aedes aegypti	7159:000822	AAEL002183	22	0	22	27	22	0.7744	Q1HRQ3	Dolichyl-diphosphooligosaccharide--protein glycosyltransferase subunit DAD1
EOG09160BUM	Aedes aegypti	7159:002952	AAEL011045	18	3	21	27	25	0.7746	Q16R87	Similarity:Contains chitin-binding type R&R domain.
EOG091603GP	Aedes aegypti	7159:002bf2	AAEL011746	25	0	25	27	25	0.7749	Q16P82	Succinyl-CoA ligase subunit beta
EOG091605SX	Aedes aegypti	7159:00137c	AAEL005197	26	0	26	27	26	0.7749	Q17AT2	Gtr1/RagA G protein
EOG091606B5	Aedes aegypti	7159:0013b4	AAEL005255	25	0	25	27	25	0.7749	Q17AL6	PAR-domain protein 1
EOG09160BUA	Aedes aegypti	7159:002e4f	AAEL012379	13	0	13	27	13	0.7749	Q16MA1	NA
EOG091603B0	Aedes aegypti	7159:000f28	AAEL004041	24	2	26	27	28	0.775	Q17DW6	flotillin-2
EOG091608HV	Aedes aegypti	7159:002d04	AAEL012035	26	0	26	27	26	0.7753	Q1HQT6	vacuolar ATP synthase subunit e
EOG09160AP8	Aedes aegypti	7159:001090	AAEL004428	23	1	24	27	25	0.7753	Q17CV1	Similarity:Contains 1 basic helix-loop-helix (bHLH) domain.
EOG091600TQ	Aedes aegypti	7159:002af7	AAEL011480	26	1	27	27	28	0.7754	Q16PY9	tpr repeat nuclear phosphoprotein
EOG091600SH	Aedes aegypti	7159:002ee4	AAEL012539	25	0	25	27	25	0.7757	Q16LS8	heparan sulphate n-deacetylase/n-sulfotransferase
EOG0916081L	Aedes aegypti	7159:00384e	AAEL015143	25	0	25	27	25	0.776	Q16EJ6	glycine rich RNA binding protein, putative
EOG09160038	Aedes aegypti	7159:001795	AAEL006307	26	1	27	27	28	0.7761	Q176P0	Similarity:Contains ATP-grasp domain.
EOG09160C49	Aedes aegypti	7159:0001a0	AAEL000449	23	2	25	27	30	0.7762	Q17PA3	acidic ribosomal protein P1, putative
EOG09160C49	Aedes aegypti	7159:000d36	AAEL003530	23	2	25	27	30	0.7762	Q1HRP7	acidic ribosomal protein P1, putative
EOG09160C49	Aedes aegypti	7159:0012d8	AAEL005027	23	2	25	27	30	0.7762	Q17BC2	acidic ribosomal protein P1, putative
EOG09160C49	Aedes aegypti	7159:0024c2	AAEL009830	23	2	25	27	30	0.7762	Q16UQ3	acidic ribosomal protein P1, putative
EOG09160C49	Aedes aegypti	7159:0032d9	AAEL013587	23	2	25	27	30	0.7762	Q16IP6	acidic ribosomal protein P1, putative
EOG091601IA	Aedes aegypti	7159:0031cf	AAEL013319	17	1	18	27	19	0.7763	Q16JI7	EF-Hand 1, calcium-binding site
EOG091608V1	Aedes aegypti	7159:0024ad	AAEL009808	21	1	22	27	23	0.7764	Q1HQU5	ATP synthase subunit d
EOG091608ER	Aedes aegypti	7159:00104c	AAEL004355	26	0	26	27	26	0.7766	Q17D08	Pre-mRNA-splicing factor 38
EOG091608RL	Aedes aegypti	7159:001f11	AAEL008303	22	1	23	27	24	0.7766	Q16Z50	Calponin
EOG091602VU	Aedes aegypti	7159:00286c	AAEL010793	25	1	26	27	27	0.7767	Q16RX7	Similarity:Contains 1 F-box domain.
EOG091602VU	Aedes aegypti	7159:003494	AAEL014073	25	1	26	27	27	0.7767	Q16HD3	Leucine-rich repeat domain, L domain-like
EOG091603SE	Aedes aegypti	7159:002a59	AAEL011317	25	1	26	27	28	0.7767	Q16QD8	Similarity:Belongs to the actin family.
EOG091605DE	Aedes aegypti	7159:002779	AAEL010543	25	0	25	27	25	0.7767	Q16SP3	Similarity:Belongs to the cyclin family.
EOG091607FF	Aedes aegypti	7159:001d9b	AAEL007920	26	1	27	27	28	0.7769	Q170G1	MOB kinase activator family
EOG091604KC	Aedes aegypti	7159:003026	AAEL012877	26	1	27	27	28	0.7771	Q16KU0	homeobox protein extradenticle, putative
EOG091606MU	Aedes aegypti	7159:001585	AAEL005751	22	4	26	27	30	0.7771	Q178V3	lachesin, putative
EOG091607X3	Aedes aegypti	7159:0006a7	AAEL001797	26	0	26	27	26	0.7771	Q17K60	ATP-dependent Clp protease proteolytic subunit
EOG09160A97	Aedes aegypti	7159:002089	AAEL008697	16	1	17	27	18	0.7771	Q16KF9	cytochrome c oxidase, subunit VB, putative
EOG09160A97	Aedes aegypti	7159:0030a3	AAEL013007	16	1	17	27	18	0.7771	Q16KF9	cytochrome c oxidase, subunit VB, putative
EOG091604QS	Aedes aegypti	7159:001718	AAEL006171	24	1	25	27	26	0.7772	Q177C7	n-myc downstream regulated
EOG09160COK	Aedes aegypti	7159:0004d3	AAEL001314	12	0	12	27	12	0.7773	Q17LN6	Myeloma-overexpressed 2-like
EOG091607WD	Aedes aegypti	7159:001ad3	AAEL007177	26	1	27	27	28	0.7775	Q173D8	Protein N-terminal glutamine amidohydrolase, alpha beta roll
EOG091608A7	Aedes aegypti	7159:003625	AAEL014519	20	0	20	27	20	0.7775	Q16G52	cbl-d
EOG091601HQ	Aedes aegypti	7159:002314	AAEL009383	26	1	27	27	28	0.7777	Q16W00	crooked neck protein
EOG091601LU	Aedes aegypti	7159:001cb6	AAEL007681	27	0	27	27	27	0.7779	Q171D1	NADH-ubiquinone oxidoreductase flavoprotein 1 (ndufv1)
EOG091603PS	Aedes aegypti	7159:0000dc	AAEL000242	17	8	25	27	36	0.7779	Q17PT9	Transmembrane:Helical
EOG091600WI	Aedes aegypti	7159:002c6c	AAEL011876	26	1	27	27	28	0.7784	Q16NS9	Creatinase/Aminopeptidase P/Spt16, N-terminal
EOG091600WI	Aedes aegypti	7159:003866	AAEL015182	26	1	27	27	28	0.7784	Q16EH0	Domain of unknown function DUF1747
EOG091606UI	Aedes aegypti	7159:0022ca	AAEL009304	26	1	27	27	28	0.7785	Q16WA7	Similarity:Belongs to the syntaxin family.
EOG091606UI	Aedes aegypti	7159:002f53	AAEL012657	26	1	27	27	28	0.7785	Q16LF8	syntaxin,
EOG0916087D	Aedes aegypti	7159:000461	AAEL001193	25	0	25	27	25	0.7786	Q17LZ0	Similarity:Contains 1 RGS domain.
EOG091606N1	Aedes aegypti	7159:0002f6	AAEL000816	26	0	26	27	26	0.7787	Q17N64	Carbonate dehydratase
EOG091607JY	Aedes aegypti	7159:002c27	AAEL011803	26	0	26	27	26	0.7788	Q16P12	Transmembrane:Helical
EOG091609D0	Aedes aegypti	7159:0009a1	AAEL002572	22	1	23	27	24	0.7788	Q17HX1	myosin regulatory light chain 2 (mlc-2)
EOG09160A3N	Aedes aegypti	7159:0012bb	AAEL004998	18	0	18	27	18	0.7789	Q17BD8	Immunoglobulin I-set
EOG091606YM	Aedes aegypti	7159:00265a	AAEL010248	26	0	26	27	26	0.779	Q16TF1	fibrillarin
EOG091602XQ	Aedes aegypti	7159:003d78	AAEL018329	25	1	26	27	27	0.7791	NA	NA
EOG091605EW	Aedes aegypti	7159:000435	AAEL001148	23	1	24	27	26	0.7791	Q17M87	homeobox protein
EOG0916058E	Aedes aegypti	7159:0025f6	AAEL010143	24	0	24	27	24	0.7792	Q16TS5	Isocitrate dehydrogenase
EOG091607A5	Aedes aegypti	7159:001a17	AAEL006976	26	1	27	27	28	0.7792	Q174A4	Repressor of RNA polymerase III transcription MAF1
EOG0916065S	Aedes aegypti	7159:003b42	AAEL017339	25	1	26	27	27	0.7793	NA	NA
EOG091609H7	Aedes aegypti	7159:000eec	AAEL003979	25	2	27	27	29	0.7794	Q17E15	deadenylation factor EDEN-BP, putative
EOG091609H7	Aedes aegypti	7159:00346c	AAEL014033	25	2	27	27	29	0.7794	Q16HG5	Nucleotide-binding alpha-beta plait domain
EOG0916077S	Aedes aegypti	7159:002647	AAEL010227	23	0	23	27	23	0.7795	Q1HR12	dolichol-phosphate mannosyltransferase
EOG0916010X	Aedes aegypti	7159:002f8b	AAEL012717	21	5	26	27	32	0.7797	Q16LA1	WD-repeat protein
EOG0916010X	Aedes aegypti	7159:003508	AAEL014202	21	5	26	27	32	0.7797	Q16H05	WD-repeat protein
EOG091602Y0	Aedes aegypti	7159:001cc9	AAEL007702	23	1	24	27	25	0.7797	Q171B7	T-complex protein 1 subunit delta
EOG091608KO	Aedes aegypti	7159:0006a8	AAEL001798	24	1	25	27	26	0.7797	Q17K22	protein tyrosine phosphatase prl
EOG091601OH	Aedes aegypti	7159:002b5d	AAEL011584	25	1	26	27	27	0.7798	Q16PM9	Similarity:Belongs to the chaperonin (HSP60) family.
EOG091606L0	Aedes aegypti	7159:003555	AAEL014281	26	0	26	27	26	0.7798	Q16GS0	Zinc finger protein NOA36
EOG091603MY	Aedes aegypti	7159:00148a	AAEL005484	24	0	24	27	24	0.7799	Q179V9	Similarity:Contains 1 PDZ (DHR) domain.
EOG091603IZ	Aedes aegypti	7159:0010d7	AAEL004501	23	4	27	27	31	0.78	Q0IFM6	S-adenosylmethionine synthase
EOG0916033Y	Aedes aegypti	7159:002522	AAEL009928	26	1	27	27	28	0.7802	Q16UF5	shoc2
EOG0916033Y	Aedes aegypti	7159:0036e1	AAEL014718	26	1	27	27	28	0.7802	Q16FL4	shoc2
EOG091602MG	Aedes aegypti	7159:002b2e	AAEL011535	25	1	26	27	27	0.7803	Q16EG4	WD-repeat protein
EOG091602MG	Aedes aegypti	7159:00386c	AAEL015199	25	1	26	27	27	0.7803	Q16EG4	WD-repeat protein
EOG091602CJ	Aedes aegypti	7159:000293	AAEL000707	26	1	27	27	28	0.7804	Q17NH7	cell cycle control protein cwf22
EOG09160080	Aedes aegypti	7159:000a31	AAEL002718	27	0	27	27	27	0.7805	Q17HC5	Transmembrane:Helical
EOG091600XG	Aedes aegypti	7159:001c1b	AAEL007521	25	1	26	27	27	0.7805	Q171U5	importin beta-2
EOG0916022K	Aedes aegypti	7159:001b35	AAEL007282	23	4	27	27	31	0.7805	Q172R6	syntaxin binding protein-1,2,3
EOG0916022K	Aedes aegypti	7159:001b47	AAEL007300	23	4	27	27	31	0.7805	Q172R5	syntaxin binding protein-1,2,3
EOG091602GD	Aedes aegypti	7159:002cd0	AAEL011981	25	1	26	27	27	0.7805	Q16NG0	Similarity:Belongs to the group II decarboxylase family.
EOG091603D7	Aedes aegypti	7159:0014a7	AAEL005513	26	1	27	27	28	0.7806	Q179T8	SMAD family member
EOG091602FL	Aedes aegypti	7159:002bf0	AAEL011744	19	1	20	27	21	0.7808	Q16P64	DEAD box ATP-dependent RNA helicase
EOG09160471	Aedes aegypti	7159:002ac6	AAEL011429	24	1	25	27	26	0.7808	Q0IEC0	Similarity:Contains MHD (mu homology) domain.
EOG091609XX	Aedes aegypti	7159:0035aa	AAEL014368	21	1	22	27	23	0.7809	Q16GI2	sap18
EOG09160298	Aedes aegypti	7159:0033ad	AAEL013823	21	5	26	27	33	0.781	Q16I21	Similarity:Contains protein kinase domain.
EOG09160298	Aedes aegypti	7159:0033ae	AAEL013824	21	5	26	27	33	0.781	Q16I21	Similarity:Contains protein kinase domain.
EOG09160374	Aedes aegypti	7159:002e70	AAEL012412	23	4	27	27	31	0.781	Q16M66	slit protein
EOG09160374	Aedes aegypti	7159:0038c9	AAEL015322	23	4	27	27	31	0.781	Q16E92	slit protein
EOG0916065I	Aedes aegypti	7159:003b76	AAEL017393	5	1	6	27	7	0.7811	NA	NA
EOG09160AQZ	Aedes aegypti	7159:000b91	AAEL003081	17	0	17	27	17	0.7813	Q0IG58	NA
EOG09160AWI	Aedes aegypti	7159:001a51	AAEL007036	4	0	4	27	4	0.7813	Q173R8	runx1 (aml1)
EOG0916033T	Aedes aegypti	7159:0035de	AAEL014422	24	1	25	27	26	0.7816	Q16GC9	Similarity:Contains 1 PDZ (DHR) domain.
EOG091602M1	Aedes aegypti	7159:0030b7	AAEL013028	22	4	26	27	30	0.7818	Q16KD9	zinc finger protein
EOG0916034S	Aedes aegypti	7159:000bc7	AAEL003140	13	1	14	27	16	0.7819	Q17GA8	retinoblastoma binding protein
EOG0916082K	Aedes aegypti	7159:000a9c	AAEL002831	23	1	24	27	25	0.7819	Q17H04	NO signalling/Golgi transport ligand-binding domain
EOG09160BFC	Aedes aegypti	7159:003828	AAEL015101	18	2	20	27	22	0.782	Q16EM3	Zinc finger, C2H2
EOG0916058C	Aedes aegypti	7159:0003de	AAEL001058	23	2	25	27	27	0.7822	Q16FI4	jun activation domain binding protein
EOG0916058C	Aedes aegypti	7159:0036fe	AAEL014747	23	2	25	27	27	0.7822	Q16FI4	jun activation domain binding protein
EOG091609K9	Aedes aegypti	7159:002e20	AAEL012327	18	1	19	27	20	0.7822	Q16ME9	PET191 polypeptide, putative
EOG091603MZ	Aedes aegypti	7159:002a2d	AAEL011273	27	0	27	27	27	0.7824	Q16QI9	Uridine kinase
EOG09160362	Aedes aegypti	7159:001c95	AAEL007646	24	2	26	27	29	0.7827	Q171H1	Band 4.1 domain
EOG091603LL	Aedes aegypti	7159:0002b5	AAEL000746	25	0	25	27	25	0.7828	Q1HQW5	Isocitrate dehydrogenase
EOG091600PO	Aedes aegypti	7159:0026aa	AAEL010328	24	2	26	27	28	0.7829	Q16TA8	Similarity:Contains N-terminal Ras-GEF domain.
EOG091602GE	Aedes aegypti	7159:002509	eIF3-S7	26	0	26	27	26	0.7829	Q16UF8	Eukaryotic translation initiation factor 3 subunit 7
EOG091600M4	Aedes aegypti	7159:003a91	AAEL017156	24	3	27	27	30	0.783	NA	NA
EOG091605CS	Aedes aegypti	7159:000c53	AAEL003288	24	1	25	27	26	0.783	Q17FT8	Similarity:Belongs to the mitochondrial carrier (TC 2.A.29) family.
EOG0916010S	Aedes aegypti	7159:000d2a	AAEL003518	26	1	27	27	28	0.7832	Q0IG50	Calcium-transporting ATPase
EOG091603QX	Aedes aegypti	7159:001fdf	AAEL008517	21	2	23	27	25	0.7832	Q16YK5	Elongation factor Tu
EOG091603QX	Aedes aegypti	7159:003b68	AAEL017378	21	2	23	27	25	0.7832	NA	NA
EOG0916045E	Aedes aegypti	7159:0002cb	AAEL000770	25	1	26	27	27	0.7832	Q17N69	Lissencephaly-1 homolog
EOG091608RC	Aedes aegypti	7159:0010bd	AAEL004475	24	1	25	27	26	0.7832	Q1HR60	Arp2/3 complex 21 kDa subunit
EOG091607J8	Aedes aegypti	7159:001997	AAEL006839	26	0	26	27	26	0.7833	Q174M0	ring finger protein
EOG091607R6	Aedes aegypti	7159:00270f	AAEL010430	25	0	25	27	25	0.7835	Q16SZ9	Similarity:Belongs to the small GTPase superfamily. Rab family.
EOG0916069B	Aedes aegypti	7159:00102e	RpL5	23	0	23	27	23	0.7836	Q1HQU2	60S ribosomal protein L5
EOG091609RS	Aedes aegypti	7159:000328	AAEL000868	18	6	24	27	30	0.7837	Q17MX1	Similarity:Contains 1 PDZ (DHR) domain.
EOG09160B96	Aedes aegypti	7159:00294b	AAEL011037	18	2	20	27	22	0.7837	Q16R88	Similarity:Contains chitin-binding type R&R domain.
EOG09160B96	Aedes aegypti	7159:00320a	AAEL013380	18	2	20	27	22	0.7837	Q16JC3	Similarity:Contains chitin-binding type R&R domain.
EOG0916056L	Aedes aegypti	7159:002fda	AAEL012801	24	1	25	27	26	0.7838	Q16KB1	Transmembrane:Helical
EOG0916056L	Aedes aegypti	7159:0030ca	AAEL013047	24	1	25	27	26	0.7838	Q16KB1	Transmembrane:Helical
EOG09160BPV	Aedes aegypti	7159:003ab9	AAEL017198	18	5	23	27	28	0.7838	NA	NA
EOG091607JJ	Aedes aegypti	7159:003118	AAEL013128	27	0	27	27	27	0.7839	Q16K45	Very-long-chain 3-oxoacyl-CoA synthase
EOG091608HK	Aedes aegypti	7159:0034bc	AAEL014125	25	0	25	27	25	0.7839	Q16H81	Similarity:Contains homeobox DNA-binding domain.
EOG09160264	Aedes aegypti	7159:002f50	AAEL012654	26	1	27	27	28	0.784	Q16LG0	Active Site:Charge relay system
EOG091608MK	Aedes aegypti	7159:001656	AAEL005968	23	1	24	27	25	0.784	Q178A5	Ufm1-conjugating enzyme 1
EOG091600V4	Aedes aegypti	7159:0001a1	AAEL000450	25	2	27	27	30	0.7842	Q17P86	Similarity:Contains 1 C2 domain.
EOG091601WN	Aedes aegypti	7159:000aec	AAEL002913	27	0	27	27	27	0.7843	Q17GS0	Similarity:Belongs to the ABC transporter superfamily.
EOG09160A43	Aedes aegypti	7159:002471	AAEL009743	18	6	24	27	30	0.7844	Q16UZ8	Similarity:Contains homeobox DNA-binding domain.
EOG09160A43	Aedes aegypti	7159:002527	AAEL009933	18	6	24	27	30	0.7844	Q16UE1	Similarity:Contains homeobox DNA-binding domain.
EOG0916020M	Aedes aegypti	7159:00029d	AAEL000717	24	0	24	27	24	0.7846	Q17NI9	protocadherin
EOG0916068M	Aedes aegypti	7159:000eb1	GPRDOP1	24	0	24	27	24	0.7846	Q17E57	Similarity:Belongs to the G-protein coupled receptor 1 family.
EOG091601AJ	Aedes aegypti	7159:003095	AAEL012991	24	2	26	27	28	0.7847	Q16KH8	rad25/xp-b DNA repair helicase
EOG091601AJ	Aedes aegypti	7159:003160	AAEL013205	24	2	26	27	28	0.7847	Q16JU4	rad25/xp-b DNA repair helicase
EOG091604DC	Aedes aegypti	7159:00084d	AAEL002226	24	0	24	27	24	0.7847	Q17IV7	casein kinase
EOG0916085C	Aedes aegypti	7159:000b89	AAEL003073	21	0	21	27	21	0.7847	Q0IGA0	Similarity:Belongs to the ETS family.
EOG09160C7C	Aedes aegypti	7159:000cf0	AAEL003459	21	1	22	27	23	0.7847	Q17FB5	Failed axon connections
EOG091600K4	Aedes aegypti	7159:001b7a	AAEL007353	22	3	25	27	28	0.7848	Q172K9	Similarity:Belongs to the cullin family.
EOG0916070Z	Aedes aegypti	7159:000db5	EIF6	27	0	27	27	27	0.7849	Q17EW3	Eukaryotic translation initiation factor 6
EOG091605A0	Aedes aegypti	7159:001db3	AAEL007945	24	0	24	27	24	0.785	Q170C2	Eukaryotic translation initiation factor 3 subunit H
EOG091602T3	Aedes aegypti	7159:001c99	AAEL007650	25	1	26	27	27	0.7851	Q171G0	Similarity:Belongs to the TCP-1 chaperonin family.
EOG0916033K	Aedes aegypti	7159:0006c2	AAEL001827	25	1	26	27	27	0.7851	Q17K27	Similarity:Contains UBP-type zinc finger.
EOG091607EZ	Aedes aegypti	7159:00169f	AAEL006047	21	0	21	27	21	0.7851	Q177R4	Transmembrane:Helical
EOG0916083T	Aedes aegypti	7159:0034cd	AAEL014142	25	0	25	27	25	0.7851	Q16H63	Similarity:Belongs to the CDP-alcohol phosphatidyltransferase class-I family.
EOG091601A4	Aedes aegypti	7159:00283b	AAEL010742	26	1	27	27	28	0.7852	Q16S14	Elongation factor G1
EOG0916071W	Aedes aegypti	7159:002f99	Adk2	26	0	26	27	26	0.7852	Q1HQK0	Adenylate kinase cytosolic and mitochondrial
EOG0916092R	Aedes aegypti	7159:002d50	AAEL012113	24	0	24	27	24	0.7852	Q16N19	Similarity:Belongs to the V-ATPase proteolipid subunit family.
EOG0916054C	Aedes aegypti	7159:00174b	AAEL006223	24	0	24	27	24	0.7853	NA	replication factor C, 37kD-subunit, putative
EOG09160A5R	Aedes aegypti	7159:000ebc	AAEL003931	5	0	5	27	5	0.7853	Q0IFX9	Sperm-tail PG-rich repeat
EOG091605AN	Aedes aegypti	7159:001e51	AAEL008108	26	0	26	27	26	0.7855	Q0IES0	guanine nucleotide-binding protein beta 2 (g protein beta2)
EOG091602RW	Aedes aegypti	7159:00338d	AAEL013788	26	0	26	27	26	0.7856	Q16I58	Transmembrane:Helical
EOG09160C5I	Aedes aegypti	7159:000c0e	AAEL003215	17	2	19	27	21	0.7856	Q16SM5	heat shock factor binding protein, putative
EOG09160C5I	Aedes aegypti	7159:00277c	AAEL010546	17	2	19	27	21	0.7856	Q16SM5	heat shock factor binding protein, putative
EOG091608HA	Aedes aegypti	7159:001f1d	AAEL008315	19	0	19	27	19	0.7857	Q16Z48	Transgelin
EOG091609IV	Aedes aegypti	7159:0000d3	AAEL000233	18	0	18	27	18	0.7858	Q17PT7	membrane-associated guanylate kinase, putative
EOG09160C8D	Aedes aegypti	7159:0008e6	AAEL002381	18	3	21	27	24	0.7858	Q17IC2	High mobility group box domain
EOG09160C8D	Aedes aegypti	7159:002ab7	AAEL011414	18	3	21	27	24	0.7858	Q1HR93	high mobility group non-histone protein, putative
EOG09160BUG	Aedes aegypti	7159:0007d9	AAEL002110	10	9	19	27	28	0.7859	Q17J77	Similarity:Contains chitin-binding type R&R domain.
EOG091603H2	Aedes aegypti	7159:000733	AAEL001940	26	0	26	27	26	0.7861	Q17JP6	Phosphatidate cytidylyltransferase
EOG091608FR	Aedes aegypti	7159:000c4c	AAEL003281	26	0	26	27	26	0.7862	Q17FV9	Similarity:Belongs to the small GTPase superfamily. Arf family.
EOG091601MR	Aedes aegypti	7159:002070	AAEL008672	26	1	27	27	28	0.7863	Q16Y47	Similarity:Belongs to the ABC transporter superfamily.
EOG0916073D	Aedes aegypti	7159:00260d	AAEL010168	23	0	23	27	23	0.7863	Q1HRV1	Similarity:Belongs to the ribosomal protein S5P family.
EOG091608U2	Aedes aegypti	7159:00204a	AAEL008630	23	4	27	27	31	0.7863	Q16Y79	GTP-binding protein alpha subunit, gna
EOG091603H7	Aedes aegypti	7159:0018e1	AAEL006649	25	0	25	27	25	0.7864	Q175H1	Similarity:Contains 1 MATH domain.
EOG091608AW	Aedes aegypti	7159:001cc6	AAEL007699	24	0	24	27	24	0.7864	Q1HR72	60S ribosomal protein L9
EOG091605FM	Aedes aegypti	7159:001594	AAEL005766	25	2	27	27	29	0.7868	Q178U8	Fructose-bisphosphate aldolase
EOG091606EI	Aedes aegypti	7159:000f8a	AAEL004147	25	2	27	27	29	0.7868	Q17DI6	Tetraspanin
EOG091600XJ	Aedes aegypti	7159:000ae5	AAEL002906	26	1	27	27	28	0.7869	Q17GS7	26S proteasome regulatory subunit rpn2
EOG091604J1	Aedes aegypti	7159:000cda	AAEL003436	26	0	26	27	26	0.7869	Q17FF9	Similarity:Belongs to the COE family.
EOG091604KF	Aedes aegypti	7159:00309e	AAEL013002	26	1	27	27	28	0.7869	Q16KG6	cdk9
EOG09160A98	Aedes aegypti	7159:003613	MED10	24	1	25	27	26	0.7869	Q16G71	Mediator complex subunit 10
EOG091601JV	Aedes aegypti	7159:000129	AAEL000321	25	2	27	27	29	0.787	Q16EU8	Acetyl-coenzyme A synthetase
EOG091601JV	Aedes aegypti	7159:0037dd	AAEL015010	25	2	27	27	29	0.787	Q16EU8	Acetyl-coenzyme A synthetase
EOG091602BJ	Aedes aegypti	7159:0022ae	AAEL009273	26	1	27	27	28	0.787	Q16WB3	Inosine-5'-monophosphate dehydrogenase
EOG091608IF	Aedes aegypti	7159:00192e	AAEL006728	25	0	25	27	25	0.7871	Q174Z9	Similarity:Belongs to the ubiquitin-conjugating enzyme family.
EOG0916036D	Aedes aegypti	7159:002318	AAEL009387	26	1	27	27	28	0.7872	Q16VW4	Hexokinase
EOG091609V4	Aedes aegypti	7159:001635	MED22	24	1	25	27	26	0.7872	Q178E6	Mediator complex subunit 22
EOG09160CKU	Aedes aegypti	7159:001e7a	AAEL008149	3	1	4	27	5	0.7872	Q16ZN0	Cysteine alpha-hairpin motif superfamily
EOG09160CKU	Aedes aegypti	7159:0034dc	AAEL014157	3	1	4	27	5	0.7872	Q16H46	Cysteine alpha-hairpin motif superfamily
EOG09160033	Aedes aegypti	7159:002023	AAEL008587	23	2	25	27	27	0.7873	Q16YE2	Transmembrane:Helical
EOG091603AG	Aedes aegypti	7159:003004	AAEL012843	23	3	26	27	29	0.7873	Q16KA0	Tubulin gamma chain
EOG091603AG	Aedes aegypti	7159:0030db	AAEL013064	23	3	26	27	29	0.7873	Q16KA0	Tubulin gamma chain
EOG0916046F	Aedes aegypti	7159:0006f1	AAEL001874	26	0	26	27	26	0.7873	Q17K03	Similarity:Contains PCI domain.
EOG091606G1	Aedes aegypti	7159:001669	AAEL005991	22	2	24	27	26	0.7875	Q177Y5	Similarity:Belongs to the mitochondrial carrier (TC 2.A.29) family.
EOG0916028Z	Aedes aegypti	7159:0016dd	AAEL006110	24	0	24	27	24	0.7877	Q177I7	g protein-coupled receptor kinase 6 and
EOG091602BP	Aedes aegypti	7159:003703	AAEL014752	24	2	26	27	28	0.7878	Q16FI1	Cofactor of BRCA1
EOG091609N5	Aedes aegypti	7159:000b75	AAEL003052	18	8	26	27	36	0.7878	Q0IG77	Transmembrane:Helical
EOG091607SR	Aedes aegypti	7159:002355	AAEL009453	24	1	25	27	26	0.7879	Q16VR9	Transmembrane:Helical
EOG091607SR	Aedes aegypti	7159:002c47	AAEL011835	24	1	25	27	26	0.7879	Q16NV9	Transmembrane:Helical
EOG091600Y8	Aedes aegypti	7159:002651	AAEL010238	26	1	27	27	28	0.788	Q16TH1	Similarity:Contains PIPK domain.
EOG091600Y8	Aedes aegypti	7159:003890	AAEL015255	26	1	27	27	28	0.788	Q16ED7	Similarity:Contains PIPK domain.
EOG091603SF	Aedes aegypti	7159:002116	AAEL008848	25	1	26	27	27	0.788	Q16XK3	ATP synthase subunit gamma
EOG091604GU	Aedes aegypti	7159:000ce1	AAEL003443	26	0	26	27	26	0.788	Q17FE0	threonine dehydrogenase
EOG0916055V	Aedes aegypti	7159:00072a	AAEL001931	16	1	17	27	18	0.788	Q17JQ2	o-sialoglycoprotein endopeptidase
EOG0916055V	Aedes aegypti	7159:000735	AAEL001942	16	1	17	27	18	0.788	Q17JQ4	o-sialoglycoprotein endopeptidase
EOG091602XA	Aedes aegypti	7159:000e08	AAEL003746	25	2	27	27	29	0.7881	Q0IG02	4-Hydroxybutyrate CoA-transferase, putative
EOG0916040G	Aedes aegypti	7159:002dd5	AAEL012248	25	1	26	27	27	0.7881	Q16MN1	Similarity:Belongs to the ligand-gated ion channel (TC 1.A.9) family.
EOG0916078K	Aedes aegypti	7159:001614	AAEL005901;RS3A_AEDAE_a	24	1	25	27	26	0.7881	Q0IFA5	40S ribosomal protein S3a
EOG0916078K	Aedes aegypti	7159:003134	AAEL013158	24	1	25	27	26	0.7881	Q1HRR3	40S ribosomal protein S3a
EOG091600M0	Aedes aegypti	7159:001813	AAEL006436	25	2	27	27	29	0.7882	Q176D0	phosphorylase b kinase beta, kpbb
EOG091605FL	Aedes aegypti	7159:002a4a	AAEL011302	24	2	26	27	28	0.7882	Q16QE7	Annexin
EOG091607D4	Aedes aegypti	7159:0030bd	AAEL013034	7	0	7	27	7	0.7882	Q16KD0	Diacylglycerol kinase
EOG091605RS	Aedes aegypti	7159:001475	AAEL005463	21	4	25	27	29	0.7884	Q179X5	calbindin-32
EOG091609PE	Aedes aegypti	7159:0007e2	AAEL002119	24	1	25	27	26	0.7884	Q17J62	ras
EOG09160B52	Aedes aegypti	7159:001b0e	AAEL007241	20	1	21	27	22	0.7884	Q172X2	Anaphase-promoting complex subunit 11
EOG091601TQ	Aedes aegypti	7159:002916	AAEL010977	22	2	24	27	26	0.7885	Q16RE9	Similarity:Belongs to the ABC transporter superfamily.
EOG091608DU	Aedes aegypti	7159:002709	AAEL010423	24	0	24	27	24	0.7886	Q16T31	ARL3, putative
EOG091603P9	Aedes aegypti	7159:00299d	AAEL011123	26	1	27	27	28	0.7887	Q16QY9	Similarity:Belongs to the AAA ATPase family.
EOG091604PE	Aedes aegypti	7159:002a37	AAEL011283	27	0	27	27	27	0.7887	Q16QI1	Cytoplasmic tRNA adenylyltransferase 1
EOG0916096H	Aedes aegypti	7159:002567	AAEL010000	22	2	24	27	26	0.7891	Q16U54	ganglioside induced differentiation associated protein
EOG091608HG	Aedes aegypti	7159:001e98	AAEL008179	25	0	25	27	25	0.7893	Q16ZI4	RAS homologue enriched in brain (RHEB)
EOG09160ASM	Aedes aegypti	7159:001678	AAEL006006	22	1	23	27	24	0.7893	Q177V8	swiprosin
EOG0916074O	Aedes aegypti	7159:0014a2	AAEL005508	25	1	26	27	27	0.7894	Q179U9	NADH-ubiquinone oxidoreductase 24 kda subunit
EOG091608X0	Aedes aegypti	7159:00223e	AAEL009160	20	4	24	27	32	0.7894	Q0IEP2	skp1
EOG091609NC	Aedes aegypti	7159:001095	AAEL004433	24	1	25	27	26	0.7894	Q17CT6	Similarity:Belongs to the ribosomal protein L14P family.
EOG091602JE	Aedes aegypti	7159:00238b	AAEL009507	25	1	26	27	27	0.7895	Q0IEL8	Glucose-6-phosphate 1-dehydrogenase
EOG0916080F	Aedes aegypti	7159:001e2e	AAEL008072	10	16	26	27	43	0.7895	Q16ZS6	Similarity:Belongs to the complex I 20 kDa subunit family.
EOG09160293	Aedes aegypti	7159:000913	AAEL002428	26	1	27	27	28	0.7896	Q17IA8	Similarity:Contains 1 BTB (POZ) domain.
EOG09160293	Aedes aegypti	7159:0034fe	AAEL014192	26	1	27	27	28	0.7896	Q16H11	Similarity:Contains 1 BTB (POZ) domain.
EOG091601J5	Aedes aegypti	7159:002ff4	AAEL012827	25	1	26	27	27	0.7897	Q16KZ2	endoplasmin
EOG0916049K	Aedes aegypti	7159:0032a9	AAEL013539	26	1	27	27	28	0.7897	Q16IU8	Similarity:Contains 3 SH3 domains.
EOG091605EQ	Aedes aegypti	7159:00122f	AAEL004855	1	26	27	27	62	0.7897	Q1HRU0	Similarity:Belongs to the mitochondrial carrier (TC 2.A.29) family.
EOG091605EQ	Aedes aegypti	7159:0028bd	AAEL010884	1	26	27	27	62	0.7897	Q16RN6	Similarity:Belongs to the mitochondrial carrier (TC 2.A.29) family.
EOG091605EQ	Aedes aegypti	7159:00325b	AAEL013461	1	26	27	27	62	0.7897	Q16J30	parvin
EOG091601YQ	Aedes aegypti	7159:001096	AAEL004434	15	0	15	27	15	0.7898	Q17CT0	transketolase
EOG091605BN	Aedes aegypti	7159:000512	AAEL001379	26	0	26	27	26	0.7898	Q17LG1	Protein of unknown function DUF2046
EOG091603BU	Aedes aegypti	7159:00283c	AAEL010743	26	0	26	27	26	0.79	Q16S16	cysteine desulfurylase
EOG091604FC	Aedes aegypti	7159:001a6e	AAEL007066	27	0	27	27	27	0.79	Q173P7	mitotic checkpoint protein and poly(a)+ RNA export protein
EOG09160214	Aedes aegypti	7159:00141c	AAEL005367	26	0	26	27	26	0.7901	Q17AB3	Similarity:Contains myotubularin phosphatase domain.
EOG091607ZG	Aedes aegypti	7159:003b99	AAEL017428	23	2	25	27	27	0.7901	NA	GPCR Orphan/Putative Class A Family
EOG09160EJE	Aedes aegypti	7159:003123	AAEL013141	3	0	3	27	3	0.7901	Q16K12	Transmembrane:Helical
EOG091604FN	Aedes aegypti	7159:003054	AAEL012925	26	0	26	27	26	0.7902	Q16KP3	carbon catabolite repressor protein
EOG091600PN	Aedes aegypti	7159:002311	AAEL009380	25	0	25	27	25	0.7903	Q16W08	Phosphoinositide phospholipase C
EOG091603SZ	Aedes aegypti	7159:003a18	AAEL017029	25	0	25	27	25	0.7903	NA	NA
EOG09160AFZ	Aedes aegypti	7159:00328a	AAEL013508	15	0	15	27	15	0.7903	Q16IY3	Immunoglobulin
EOG091607WV	Aedes aegypti	7159:002306	AAEL009369	15	0	15	27	15	0.7904	Q16W14	Translation initiation factor IF- 2, domain 3
EOG091602NH	Aedes aegypti	7159:0019fc	AAEL006946	25	1	26	27	27	0.7906	Q174C6	Similarity:Belongs to the TCP-1 chaperonin family.
EOG091600WW	Aedes aegypti	7159:0015ff	AAEL005879	27	0	27	27	27	0.7907	Q178I1	vinculin
EOG091602KT	Aedes aegypti	7159:001d96	Moe	22	1	23	27	24	0.7907	Q170J7	Moesin/ezrin/radixin homolog 1
EOG0916042W	Aedes aegypti	7159:003258	AAEL013458;GS2	26	0	26	27	26	0.7907	Q16J32	Glutamine synthetase
EOG0916070H	Aedes aegypti	7159:0014a1	AAEL005507	23	2	25	27	27	0.7907	Q179V1	POU domain protein
EOG091607UE	Aedes aegypti	7159:000847	AAEL002220	22	1	23	27	24	0.7907	Q17J06	RGS7BP/RGS9BP family
EOG09160ASG	Aedes aegypti	7159:000623	AAEL001660	21	1	22	27	23	0.7907	Q17KI7	kv channel-interacting protein 2 (KChIP2), putative
EOG091607T5	Aedes aegypti	7159:002840	AAEL010747	26	0	26	27	26	0.7908	Q0IEF4	vasodilator-stimulated phosphoprotein
EOG0916049H	Aedes aegypti	7159:00073e	AAEL001951	2	18	20	27	39	0.7909	Q6QNY2	Similarity:Belongs to the actin family.
EOG0916049H	Aedes aegypti	7159:002353	AAEL009451	2	18	20	27	39	0.7909	Q16VS2	Similarity:Belongs to the actin family.
EOG091607RY	Aedes aegypti	7159:003642	AAEL014548	23	0	23	27	23	0.7909	Q16G24	Thioredoxin Peroxidase.
EOG09160ANH	Aedes aegypti	7159:003443	AAEL013992	25	1	26	27	27	0.7909	Q16HK3	Uncharacterised protein family UPF0139
EOG0916028T	Aedes aegypti	7159:0016e9	AAEL006122	26	1	27	27	28	0.7911	Q177G2	Transmembrane:Helical
EOG091607KK	Aedes aegypti	7159:002a95	AAEL011380	21	5	26	27	31	0.7911	Q16Q61	high mobility group B1, putative
EOG091607KK	Aedes aegypti	7159:003a45	AAEL017077	21	5	26	27	31	0.7911	NA	NA
EOG091609BT	Aedes aegypti	7159:003c35	AAEL017984	4	0	4	27	4	0.7912	NA	NA
EOG09160ALX	Aedes aegypti	7159:001d69	AAEL007868	13	1	14	27	15	0.7912	Q5MM88	Cytochrome b-c1 complex subunit 7
EOG091601AK	Aedes aegypti	7159:003210	AAEL013386	26	0	26	27	26	0.7913	Q16JB7	Vacuolar protein sorting-associated protein 35
EOG091608KS	Aedes aegypti	7159:0008a2	AAEL002311	20	0	20	27	20	0.7913	Q17IM4	ADP-ribosylation factor, putative
EOG09160C8O	Aedes aegypti	7159:001043	AAEL004346	9	1	10	27	11	0.7913	Q17D41	NA
EOG09160031	Aedes aegypti	7159:0015e1	AAEL005845	25	2	27	27	29	0.7914	Q178J6	beta chain spectrin
EOG091600FI	Aedes aegypti	7159:00028f	AAEL000703	27	0	27	27	27	0.7915	Q17NG8	Alpha-1,4 glucan phosphorylase
EOG0916030S	Aedes aegypti	7159:000eab	AAEL003914	21	5	26	27	32	0.7917	Q17E54	Similarity:Contains 1 PDZ (DHR) domain.
EOG091608AV	Aedes aegypti	7159:001cff	AAEL007760	21	2	23	27	25	0.7917	Q170Y4	mct-1 protein
EOG091605SV	Aedes aegypti	7159:002f12	AAEL012588	26	0	26	27	26	0.7918	Q0IEA0	Hsp70-interacting protein, putative
EOG0916071V	Aedes aegypti	7159:00097b	AAEL002534	10	15	25	27	42	0.7918	Q1HRT6	60S ribosomal protein L10
EOG091601DR	Aedes aegypti	7159:0021e9	AAEL009068	27	0	27	27	27	0.7919	Q16WY5	Similarity:Belongs to the TRAFAC class dynamin-like GTPase superfamily. Dynamin/Fzo/YdjA family.
EOG091602WJ	Aedes aegypti	7159:0004ff	AAEL001360	27	0	27	27	27	0.7919	Q17LF3	Coronin
EOG0916042I	Aedes aegypti	7159:00341e	AAEL013955	25	2	27	27	29	0.7919	Q16HP5	FAM46 family
EOG0916042I	Aedes aegypti	7159:0036c8	AAEL014693	25	2	27	27	29	0.7919	Q16FN8	FAM46 family
EOG0916090W	Aedes aegypti	7159:000cf5	AAEL003464	16	2	18	27	20	0.7919	Q17FB9	Transmembrane:Helical
EOG091609I8	Aedes aegypti	7159:00137a	AAEL005195	21	0	21	27	21	0.7919	Q17AS0	Similarity:Contains homeobox DNA-binding domain.
EOG091603N1	Aedes aegypti	7159:0019f2	AAEL006932	22	1	23	27	24	0.792	Q174D7	transcription factor ap-2
EOG0916054I	Aedes aegypti	7159:0019d1	AAEL006899	23	0	23	27	23	0.792	Q174G8	DNA-J/hsp40
EOG091607HV	Aedes aegypti	7159:000d24	AAEL003512	25	1	26	27	27	0.792	Q9NHW7	Aquaporin AQPAe.a
EOG091603ME	Aedes aegypti	7159:00131e	AAEL005099	12	15	27	27	44	0.7921	Q17B43	rap GTPase-activating protein
EOG091605KH	Aedes aegypti	7159:002534	AAEL009946	23	2	25	27	27	0.7922	Q16UC8	DnaJ homolog subfamily B member 11 precursor
EOG091605KH	Aedes aegypti	7159:0030af	AAEL013020	23	2	25	27	27	0.7922	Q16KF3	DNA-J/hsp40
EOG0916028P	Aedes aegypti	7159:00046b	AAEL001203	25	0	25	27	25	0.7923	Q17LW6	Palmitoyltransferase
EOG0916031F	Aedes aegypti	7159:000893	AAEL002296	26	0	26	27	26	0.7923	Q17IM1	Similarity:Belongs to the thiolase family.
EOG091602HZ	Aedes aegypti	7159:0024f7	AAEL009883	26	0	26	27	26	0.7924	Q16UJ3	26S protease (S4) regulatory subunit, putative
EOG091605F8	Aedes aegypti	7159:0015a1	AAEL005779	26	0	26	27	26	0.7924	Q178U4	Similarity:Contains CRAL-TRIO domain.
EOG091603ST	Aedes aegypti	7159:00311b	AAEL013132	24	1	25	27	26	0.7925	Q16K23	6-phosphofructo-2-kinase/fructose-2,6-bisphosphatase short form
EOG09160AMN	Aedes aegypti	7159:000ecb	AAEL003946	24	0	24	27	24	0.7925	Q0IFW2	mitochondrial ribosomal protein S33, putative
EOG0916019X	Aedes aegypti	7159:001bb5	AAEL007415	23	2	25	27	27	0.7926	Q0IF14	multicopper oxidase
EOG0916019X	Aedes aegypti	7159:0039f5	AAEL016992	23	2	25	27	27	0.7926	NA	NA
EOG0916015M	Aedes aegypti	7159:000ad2	arm	25	2	27	27	30	0.7927	Q17GS9	Armadillo segment polarity protein
EOG091606BE	Aedes aegypti	7159:002323	AAEL009400	25	2	27	27	29	0.7928	Q16VZ1	ccr4-associated factor
EOG091608FI	Aedes aegypti	7159:002a6f	AAEL011340	23	1	24	27	25	0.7928	Q16QA9	U1 small nuclear ribonucleoprotein 70 kd
EOG091608FI	Aedes aegypti	7159:00397d	AAEL015585	23	1	24	27	25	0.7928	Q1DGL4	U1 small nuclear ribonucleoprotein 70 kd
EOG091601ZZ	Aedes aegypti	7159:00200d	AAEL008565	26	1	27	27	28	0.7929	Q16YE9	Transmembrane:Helical
EOG0916097U	Aedes aegypti	7159:0002b2	AAEL000741	25	0	25	27	25	0.7929	Q17NE5	Similarity:Belongs to the ETS family.
EOG091603GE	Aedes aegypti	7159:003309	AAEL013637	27	0	27	27	27	0.793	Q16IJ1	homogentisate 1,2-dioxygenase
EOG09160A7U	Aedes aegypti	7159:000970	AAEL002523	20	0	20	27	20	0.7931	Q17HY2	mitochondrial inner membrane protein translocase, 9kD-subunit, putative
EOG091601PZ	Aedes aegypti	7159:000fd4	AAEL004228	27	0	27	27	27	0.7933	Q17DE3	Transmembrane:Helical
EOG091606IC	Aedes aegypti	7159:00182b	AAEL006460	26	0	26	27	26	0.7933	Q176B0	Similarity:Contains 1 PDZ (DHR) domain.
EOG09160432	Aedes aegypti	7159:002415	AAEL009649	26	0	26	27	26	0.7934	Q0IEK9	brg-1 associated factor
EOG091608FY	Aedes aegypti	7159:003372	AAEL013761	22	2	24	27	26	0.7934	Q16I84	Similarity:Belongs to the small GTPase superfamily. Arf family.
EOG09160A2M	Aedes aegypti	7159:001d0a	AAEL007771	27	0	27	27	27	0.7936	Q0IEV9	60S ribosomal protein L22
EOG091600HS	Aedes aegypti	7159:0012e6	AAEL005041	8	18	26	27	47	0.7937	Q17BB0	Ribosome biogenesis protein WDR12 homolog
EOG091600HS	Aedes aegypti	7159:003320	AAEL013676	8	18	26	27	47	0.7937	Q16FL0	Similarity:Belongs to the AAA ATPase family.
EOG091600HS	Aedes aegypti	7159:0036e6	AAEL014723	8	18	26	27	47	0.7937	Q16FL0	Similarity:Belongs to the AAA ATPase family.
EOG091602UI	Aedes aegypti	7159:002a96	AAEL011381	12	12	24	27	36	0.7937	Q16Q68	Similarity:Belongs to the complex I 49 kDa subunit family.
EOG09160ANL	Aedes aegypti	7159:001f4b	AAEL008363	25	0	25	27	25	0.7939	Q16Z07	transcription initiation factor TFIID subunit 12
EOG091601DK	Aedes aegypti	7159:00035f	AAEL000925	27	0	27	27	27	0.7942	Q17MW2	Similarity:Contains 2 BTB (POZ) domains.
EOG0916098E	Aedes aegypti	7159:000fca	AAEL004217	19	0	19	27	19	0.7942	Q17DI4	Protein kinase domain
EOG091600SL	Aedes aegypti	7159:00167a	AAEL006008	26	0	26	27	26	0.7945	Q177X6	Similarity:Contains HECT (E6AP-type E3 ubiquitin-protein ligase) domain.
EOG091602OU	Aedes aegypti	7159:0008f2	AAEL002394	21	5	26	27	31	0.7945	Q17IF5	Protein SCAI
EOG091609JW	Aedes aegypti	7159:0004e9	AAEL001336	22	0	22	27	22	0.7946	Q17LI1	charged multivesicular body protein 2a
EOG091600LU	Aedes aegypti	7159:001015	AAEL004297	27	0	27	27	27	0.7947	Q17D87	ATP-citrate (pro-S-)-lyase
EOG091601I4	Aedes aegypti	7159:000ea7	AAEL003910	27	0	27	27	27	0.7948	Q17E69	Similarity:Contains 1 peptidase M12B domain.
EOG0916059C	Aedes aegypti	7159:001826	AAEL006455	10	16	26	27	48	0.7949	Q176A2	Transmembrane:Helical
EOG091607BP	Aedes aegypti	7159:001772	AAEL006267	16	11	27	27	38	0.7949	Q176R5	Similarity:Belongs to the small GTPase superfamily. Rab family.
EOG091607BP	Aedes aegypti	7159:00177c	AAEL006280	16	11	27	27	38	0.7949	Q206L4	juvenile hormone acid methyltransferase, putative
EOG091608AO	Aedes aegypti	7159:00059b	AAEL001524	24	0	24	27	24	0.795	Q17KZ8	Similarity:Belongs to the small GTPase superfamily. Rab family.
EOG091608WE	Aedes aegypti	7159:0007a9	BETAFTZF1	12	13	25	27	38	0.795	Q17JA7	Similarity:Belongs to the nuclear hormone receptor family.
EOG091603KI	Aedes aegypti	7159:001490	AAEL005490	22	4	26	27	31	0.7952	Q179X0	Dipeptidase
EOG09160A4A	Aedes aegypti	7159:0024ee	AAEL009874	24	1	25	27	26	0.7952	Q16UL1	Zinc finger, RING/FYVE/PHD-type
EOG091600JA	Aedes aegypti	7159:0019f7	AAEL006937	26	1	27	27	28	0.7954	Q174C2	Structural maintenance of chromosomes protein
EOG09160BUR	Aedes aegypti	7159:0014bd	AAEL005537	16	0	16	27	16	0.7955	Q179P6	Alpha/Beta hydrolase fold
EOG091601QH	Aedes aegypti	7159:001568	AAEL005719	27	0	27	27	27	0.7957	Q0IFE2	cleavage stimulation factor
EOG0916038L	Aedes aegypti	7159:003493	AAEL014072	26	0	26	27	26	0.7957	Q16HC8	Histone acetyltransferase
EOG091603T4	Aedes aegypti	7159:000964	AAEL002510	24	0	24	27	24	0.7957	Q17HZ9	Serine hydroxymethyltransferase
EOG091605SZ	Aedes aegypti	7159:000a5d	AAEL002764	27	0	27	27	27	0.7957	Q17H89	Similarity:Belongs to the 2-oxoacid dehydrogenase family.
EOG091603L7	Aedes aegypti	7159:0005b1	AAEL001546	23	0	23	27	23	0.7958	Q17KX7	Similarity:Contains 5 ANK repeats.
EOG091608VV	Aedes aegypti	7159:002489	AAEL009770	10	14	24	27	39	0.7958	Q1HR94	SUMO-conjugating enzyme
EOG091600VQ	Aedes aegypti	7159:002833	AAEL010732	24	2	26	27	28	0.7959	Q16S17	Similarity:Contains helicase ATP-binding domain.
EOG091602J3	Aedes aegypti	7159:00166b	AAEL005993	13	13	26	27	39	0.7959	Q177X8	Similarity:Contains Sema domain.
EOG091604AQ	Aedes aegypti	7159:00178d	AAEL006299	26	0	26	27	26	0.7959	Q176Q5	methyltransferase, putative
EOG091600IA	Aedes aegypti	7159:002a5a	AAEL011318	16	9	25	27	34	0.796	Q16QE2	Guanylate cyclase
EOG091600YE	Aedes aegypti	7159:0036f1	AAEL014734	26	0	26	27	26	0.796	Q16FJ9	Alanine dehydrogenase/pyridine nucleotide transhydrogenase, NAD(H)-binding domain
EOG091601MS	Aedes aegypti	7159:000e83	AAEL003873	27	0	27	27	27	0.796	Q17E81	Glycerol-3-phosphate dehydrogenase
EOG091609E2	Aedes aegypti	7159:000f45	AAEL004071	20	1	21	27	22	0.796	Q17DU6	Function:Binds iron.
EOG09160FMW	Aedes aegypti	7159:001ae2	AAEL007194	2	0	2	27	2	0.796	Q173C8	Similarity:Contains chitin-binding type R&R domain.
EOG09160BNS	Aedes aegypti	7159:000b90	AAEL003080	9	1	10	27	11	0.7961	Q0IGA3	PH domain-like
EOG09160BNS	Aedes aegypti	7159:0034f5	AAEL014182	9	1	10	27	11	0.7961	Q16H19	PH domain-like
EOG091601LS	Aedes aegypti	7159:001c55	AAEL007579	24	2	26	27	28	0.7962	Q171P7	Transmembrane:Helical
EOG091600WJ	Aedes aegypti	7159:001104	AAEL004546	25	2	27	27	29	0.7965	Q17CI5	Beta-coat protein
EOG091604GB	Aedes aegypti	7159:001044	AAEL004347	25	0	25	27	25	0.7965	Q17D30	Eukaryotic translation initiation factor 3 subunit M
EOG091604YM	Aedes aegypti	7159:0016bb	AAEL006075	26	1	27	27	28	0.7965	Q177N0	WD-repeat protein
EOG0916000E	Aedes aegypti	7159:0024f5	AAEL009881	25	0	25	27	25	0.7966	Q16UI0	dynein heavy chain
EOG091603CM	Aedes aegypti	7159:000ec3	AAEL003938	16	0	16	27	16	0.7967	Q0IFW0	mRNA cleavage stimulating factor, 50kD-subunit, putative
EOG091609G8	Aedes aegypti	7159:00188e	AAEL006566	24	1	25	27	26	0.7969	Q175U7	Transcription elongation factor SPT4
EOG09160342	Aedes aegypti	7159:0027a6	AAEL010588	24	0	24	27	24	0.797	Q16SH0	striatin, putative
EOG091609C1	Aedes aegypti	7159:000ea9	AAEL003912	13	0	13	27	13	0.797	Q17E66	trafficking protein particle complex subunit 6b
EOG09160EI9	Aedes aegypti	7159:003b1f	AAEL017303	2	0	2	27	2	0.7971	NA	NA
EOG0916078I	Aedes aegypti	7159:00241f	AAEL009659	26	1	27	27	28	0.7972	Q16V78	heterogeneous nuclear ribonucleoprotein l (hnrnp l)
EOG091607YP	Aedes aegypti	7159:0015b3	AAEL005797	24	2	26	27	28	0.7972	Q1HQE2	BRI1-KD interacting protein, putative
EOG091607YP	Aedes aegypti	7159:002e12	AAEL012313	24	2	26	27	28	0.7972	Q1HQE2	charged multivesicular body protein 5
EOG091601YJ	Aedes aegypti	7159:001316	AAEL005091	27	0	27	27	27	0.7973	Q17B39	Glycosyltransferase family 92
EOG091608KR	Aedes aegypti	7159:00135c	AAEL005163	19	0	19	27	19	0.7975	Q17AX1	60S ribosome subunit biogenesis protein NIP7 homolog
EOG091601WQ	Aedes aegypti	7159:002e4b	AAEL012374	20	7	27	27	34	0.7976	Q16MA0	Armadillo-like helical
EOG091605VD	Aedes aegypti	7159:0002ec	AAEL000805	10	6	16	27	22	0.7976	Q17N40	Alpha/Beta hydrolase fold
EOG091605VD	Aedes aegypti	7159:000b20	AAEL002967	10	6	16	27	22	0.7976	Q17GK3	Alpha/Beta hydrolase fold
EOG091606VM	Aedes aegypti	7159:0031aa	AAEL013279	27	0	27	27	27	0.7976	Q1HRP6	Peptidyl-prolyl cis-trans isomerase
EOG0916061D	Aedes aegypti	7159:003baa	AAEL017445	22	3	25	27	28	0.7977	NA	NA
EOG091609ZB	Aedes aegypti	7159:00248a	AAEL009772	12	12	24	27	36	0.7977	Q16UW1	NTF2-like domain
EOG091601QX	Aedes aegypti	7159:001571	AAEL005728	26	0	26	27	26	0.7978	Q178X7	Similarity:Belongs to the class-II aminoacyl-tRNA synthetase family.
EOG091606IZ	Aedes aegypti	7159:0037db	AAEL015007	24	1	25	27	26	0.7978	Q16EV7	Proteasome subunit alpha type
EOG091602PX	Aedes aegypti	7159:0000ea	SCRB9	27	0	27	27	27	0.7979	Q17PS2	Transmembrane:Helical
EOG09160B2I	Aedes aegypti	7159:003a49	AAEL017081	19	0	19	27	19	0.7981	NA	NA
EOG0916018H	Aedes aegypti	7159:0010b9	AAEL004471	25	1	26	27	27	0.7984	Q17CQ1	Similarity:Contains dynamin-type G (guanine nucleotide-binding) domain.
EOG091608D7	Aedes aegypti	7159:0019f4	MED19	27	0	27	27	27	0.7984	Q174D3	Mediator complex subunit 19
EOG09160234	Aedes aegypti	7159:002dc7	AAEL012234	27	0	27	27	27	0.7986	Q16MN4	cytoplasmic dynein intermediate chain, (dhic)
EOG0916064X	Aedes aegypti	7159:0013b0	AAEL005251	7	0	7	27	7	0.7986	Q17AN6	DM13 domain
EOG0916009K	Aedes aegypti	7159:001f32	AAEL008338	23	3	26	27	29	0.7987	Q16Z25	Similarity:Contains 26 ANK repeats.
EOG0916009K	Aedes aegypti	7159:002bb1	AAEL011679	23	3	26	27	29	0.7987	Q16PD7	Similarity:Contains 29 ANK repeats.
EOG09160AK5	Aedes aegypti	7159:0001bd	AAEL000478	24	1	25	27	26	0.7987	Q17P42	Sm protein G, putative
EOG091601IU	Aedes aegypti	7159:002007	AAEL008559	24	3	27	27	30	0.7988	Q16YE5	Similarity:Contains 2 ANK repeats.
EOG091607L6	Aedes aegypti	7159:0012f5	AAEL005056	26	1	27	27	28	0.7988	Q17B68	electron transfer flavoprotein beta-subunit
EOG091605KR	Aedes aegypti	7159:002a30	AAEL011276	21	0	21	27	21	0.7989	Q16QJ1	Similarity:Belongs to the mitochondrial carrier (TC 2.A.29) family.
EOG091606HK	Aedes aegypti	7159:002eb0	AAEL012480	24	0	24	27	24	0.7989	Q16LY6	Transmembrane:Helical
EOG091605TJ	Aedes aegypti	7159:001e8b	AAEL008166	19	1	20	27	21	0.799	Q16ZI5	Similarity:Belongs to the LDH/MDH superfamily.
EOG091600K8	Aedes aegypti	7159:0008fe	AAEL002407	26	1	27	27	28	0.7991	Q17I86	DNA repair protein xp-e
EOG09160274	Aedes aegypti	7159:002f5b	AAEL012665	25	2	27	27	29	0.7992	Q16LE8	Glucose-6-phosphate isomerase
EOG09160274	Aedes aegypti	7159:003098	AAEL012994	25	2	27	27	29	0.7992	Q16KI0	Glucose-6-phosphate isomerase
EOG091602V3	Aedes aegypti	7159:0017c4	AAEL006356	25	2	27	27	29	0.7992	Q176J9	TFIIH basal transcription factor complex p52 subunit
EOG09160ACM	Aedes aegypti	7159:001ce6	AAEL007733	20	1	21	27	22	0.7992	Q171A1	NA
EOG09160ACM	Aedes aegypti	7159:0035f3	AAEL014447	20	1	21	27	22	0.7992	Q16GA5	NA
EOG0916068U	Aedes aegypti	7159:000a04	AAEL002673	26	1	27	27	28	0.7993	Q17HH4	Very-long-chain 3-oxoacyl-CoA synthase
EOG091604LF	Aedes aegypti	7159:002719	AAEL010442	16	1	17	27	18	0.7995	Q16SY0	Similarity:Belongs to the 4HPPD family.
EOG091604LF	Aedes aegypti	7159:003673	AAEL014600	16	1	17	27	18	0.7995	Q16FX9	4-hydroxyphenylpyruvate dioxygenase
EOG0916007C	Aedes aegypti	7159:000532	AAEL001411	25	2	27	27	29	0.7996	Q17L96	Similarity:Contains IQ domain.
EOG09160081	Aedes aegypti	7159:00197b	AAEL006809	24	2	26	27	28	0.7996	Q174R4	Transmembrane:Helical
EOG091602QU	Aedes aegypti	7159:002b9d	AAEL011657	26	0	26	27	26	0.7996	Q16PF9	Importin subunit alpha
EOG091604K7	Aedes aegypti	7159:0013a5	AAEL005238	26	0	26	27	26	0.7996	Q17AP0	mck1
EOG091606G2	Aedes aegypti	7159:002361	AAEL009465	25	1	26	27	27	0.7998	Q16VR5	replication factor c / DNA polymerase iii gamma-tau subunit
EOG091601X8	Aedes aegypti	7159:000980	AAEL002539	24	1	25	27	26	0.7999	Q17HT7	fimbrin/plastin
EOG09160B6Q	Aedes aegypti	7159:001621	AAEL005914	22	0	22	27	22	0.7999	Q0IFA7	DnaJ domain
EOG09160AV3	Aedes aegypti	7159:0015c7	AAEL005817	25	0	25	27	25	0.8001	Q178R6	60S ribosomal protein L26
EOG09160CHE	Aedes aegypti	7159:002158	AAEL008916	16	1	17	27	18	0.8001	Q16XC8	NA
EOG091602JI	Aedes aegypti	7159:003d00	AAEL018208	26	0	26	27	26	0.8003	NA	NA
EOG0916068I	Aedes aegypti	7159:0015db	AAEL005839	26	0	26	27	26	0.8003	Q178N8	uridine phosphorylase
EOG0916069C	Aedes aegypti	7159:00067a	AAEL001749	25	0	25	27	25	0.8003	Q17K93	Rhomboid-like protein
EOG09160BBB	Aedes aegypti	7159:0003d8	AAEL001052	25	0	25	27	25	0.8003	Q17MF2	Similarity:Belongs to the GroES chaperonin family.
EOG091601KE	Aedes aegypti	7159:00323d	AAEL013431	24	1	25	27	26	0.8004	Q16J67	proline oxidase
EOG091602BV	Aedes aegypti	7159:002326	AAEL009403	14	1	15	27	16	0.8005	Q16VX1	NA
EOG09160588	Aedes aegypti	7159:0034ef	AAEL014176	24	1	25	27	26	0.8005	Q16H33	cornichon
EOG09160588	Aedes aegypti	7159:003861	AAEL015171	24	1	25	27	26	0.8005	Q16EH4	cornichon
EOG091602P8	Aedes aegypti	7159:003429	AAEL013966	25	1	26	27	27	0.8006	Q16HN4	ATP-dependent clp protease ATP-binding subunit clpx
EOG0916041L	Aedes aegypti	7159:0024e8	AAEL009868	25	2	27	27	29	0.8006	Q16UK5	protein-tyrosine sulfotransferase
EOG0916044K	Aedes aegypti	7159:000ed7	AAEL003958	25	0	25	27	25	0.8007	Q17E21	Similarity:Belongs to the ligand-gated ion channel (TC 1.A.9) family.
EOG091600BB	Aedes aegypti	7159:00042d	AAEL001139	26	1	27	27	28	0.801	Q17M45	br serine/threonine-protein kinase
EOG0916026T	Aedes aegypti	7159:002802	AAEL010682	26	0	26	27	26	0.801	Q16S65	armc4
EOG0916095F	Aedes aegypti	7159:000692	AAEL001776	19	7	26	27	33	0.801	Q17K68	NA
EOG0916095F	Aedes aegypti	7159:000696	AAEL001780	19	7	26	27	33	0.801	Q17K67	Similarity:Contains homeobox DNA-binding domain.
EOG091600XF	Aedes aegypti	7159:000ac7	AAEL002876	24	2	26	27	28	0.8011	Q17GV3	Transmembrane:Helical
EOG091601NX	Aedes aegypti	7159:003629	AAEL014523	26	0	26	27	26	0.8011	Q16G47	Similarity:Belongs to the peptidase S8 family.
EOG091604HX	Aedes aegypti	7159:000100	AAEL000278	26	1	27	27	28	0.8011	Q17PN6	poly(p)/ATP NAD kinase
EOG09160AST	Aedes aegypti	7159:001cb7	AAEL007682	16	0	16	27	16	0.8013	Q171D7	TSC-22 / Dip / Bun
EOG091602AY	Aedes aegypti	7159:0019ee	AAEL006928	25	1	26	27	27	0.8014	Q174D6	Dihydrolipoyl dehydrogenase
EOG091603MF	Aedes aegypti	7159:001443	AAEL005409	7	20	27	27	48	0.8014	Q17A55	Similarity:Contains 1 RGS domain.
EOG091603MF	Aedes aegypti	7159:0027fc	AAEL010676	7	20	27	27	48	0.8014	Q16SA0	Similarity:Contains 1 RGS domain.
EOG091603V5	Aedes aegypti	7159:002d97	AAEL012186	25	1	26	27	27	0.8015	Q16MU7	phosphatase and actin regulator
EOG091603V5	Aedes aegypti	7159:00371b	AAEL014792	25	1	26	27	27	0.8015	Q16FF3	phosphatase and actin regulator
EOG09160ADO	Aedes aegypti	7159:003223	AAEL013405	20	0	20	27	20	0.8015	Q16J89	Similarity:Contains homeobox DNA-binding domain.
EOG091604LY	Aedes aegypti	7159:0032a5	AAEL013535	23	1	24	27	25	0.8016	Q16IU7	phosrestin ii (arrestin a) (arrestin 1)
EOG0916031G	Aedes aegypti	7159:002ce5	AAEL012004	23	3	26	27	29	0.8017	Q16NE5	beta-arrestin 1,
EOG0916031G	Aedes aegypti	7159:00333c	AAEL013704	23	3	26	27	29	0.8017	Q16ID9	beta-arrestin 1,
EOG091604WJ	Aedes aegypti	7159:00023d	AAEL000617	24	0	24	27	24	0.8017	Q17NQ5	carbonic anhydrase
EOG09160336	Aedes aegypti	7159:000992	AAEL002557	25	1	26	27	27	0.8018	Q17HW5	Transmembrane:Helical
EOG091603R1	Aedes aegypti	7159:003132	AAEL013156	25	2	27	27	29	0.8018	Q16K05	Transmembrane:Helical
EOG09160805	Aedes aegypti	7159:00151f	AAEL005641	25	2	27	27	32	0.8019	Q179G7	C-Type Lectin (CTL) - galactose binding.
EOG09160805	Aedes aegypti	7159:002b72	AAEL011612	25	2	27	27	32	0.8019	NA	C-Type Lectin (CTL) - mannose binding. Transcript A
EOG091603Y6	Aedes aegypti	7159:001aa0	AAEL007120	26	1	27	27	28	0.802	Q173L2	Similarity:Contains 2 LIM zinc-binding domains.
EOG091603Y6	Aedes aegypti	7159:00283d	AAEL010744	26	1	27	27	28	0.802	Q16S23	Similarity:Contains 2 LIM zinc-binding domains.
EOG091604QK	Aedes aegypti	7159:001a41	AAEL007018	26	0	26	27	26	0.802	Q173X0	Similarity:Belongs to the NAD(P)-dependent epimerase/dehydratase family.
EOG091605W9	Aedes aegypti	7159:001d21	AAEL007794	13	12	25	27	38	0.802	Q170V0	defective proboscis extension response
EOG0916088B	Aedes aegypti	7159:001c48	AAEL007566	26	0	26	27	26	0.802	Q171Q6	dynactin subunit P25
EOG091602OB	Aedes aegypti	7159:002f07	AAEL012576	26	1	27	27	28	0.8022	Q16LP4	Pyruvate kinase
EOG091602OB	Aedes aegypti	7159:00378a	AAEL014913	26	1	27	27	28	0.8022	Q16F38	Pyruvate kinase
EOG091603B1	Aedes aegypti	7159:0020fa	AAEL008816	26	1	27	27	28	0.8022	Q16XQ1	Transmembrane:Helical
EOG091604WE	Aedes aegypti	7159:00374c	inx	24	3	27	27	30	0.8022	Q16FA2	Innexin
EOG091606I4	Aedes aegypti	7159:002dd2	AAEL012245	11	0	11	27	11	0.8023	Q16MN2	Chitin binding domain
EOG091604D9	Aedes aegypti	7159:000bec	AAEL003179	24	1	25	27	26	0.8025	Q17G76	protein arginine n-methyltransferase 1,
EOG091604PM	Aedes aegypti	7159:0019e7	AAEL006921	25	0	25	27	25	0.8025	Q174F0	calmodulin
EOG091604QL	Aedes aegypti	7159:001a4c	AAEL007029	26	1	27	27	28	0.8025	Q173S7	tropomodulin
EOG091609IL	Aedes aegypti	7159:0014a8	AAEL005515	11	15	26	27	41	0.8025	Q179S7	heterogeneous nuclear ribonucleoprotein
EOG091607HM	Aedes aegypti	7159:003083	AAEL012973	24	0	24	27	24	0.8026	Q0IE96	uracil phosphoribosyltransferase
EOG0916069I	Aedes aegypti	7159:000a58	AAEL002759	25	1	26	27	27	0.8027	Q17H80	Similarity:Belongs to the tropomyosin family.
EOG091601RN	Aedes aegypti	7159:001c20	AAEL007526	26	1	27	27	28	0.8028	Q171U3	electron transfer flavoprotein-ubiquinone oxidoreductase
EOG091602PR	Aedes aegypti	7159:003a6f	AAEL017120	26	0	26	27	26	0.8028	NA	NA
EOG091605ED	Aedes aegypti	7159:001dc0	AAEL007958	22	5	27	27	32	0.8029	Q170B9	erk1/2
EOG091605ED	Aedes aegypti	7159:00340e	AAEL013939	22	5	27	27	32	0.8029	Q16HR0	Mitogen-activated protein kinase
EOG09160519	Aedes aegypti	7159:00296a	AAEL011069	26	1	27	27	28	0.803	Q16R56	Similarity:Contains SOCS box domain.
EOG091602VP	Aedes aegypti	7159:002b57	AAEL011578	26	1	27	27	28	0.8031	Q16PN5	serine/threonine protein kinase
EOG091602S1	Aedes aegypti	7159:002fa8	AAEL012746	26	0	26	27	26	0.8032	Q16L72	Similarity:Belongs to the TCP-1 chaperonin family.
EOG0916030M	Aedes aegypti	7159:001bd0	AAEL007442	26	0	26	27	26	0.8032	Q172D0	Similarity:Contains 1 F-box domain.
EOG091609UC	Aedes aegypti	7159:002721	AAEL010450	20	0	20	27	20	0.8032	Q1HQZ1	mitochondrial import inner membrane translocase subunit TIM10
EOG091601KX	Aedes aegypti	7159:00067c	AAEL001752	27	0	27	27	27	0.8033	Q17K85	Transmembrane:Helical
EOG091603VX	Aedes aegypti	7159:002305	AAEL009368	21	1	22	27	23	0.8033	Q16W22	Lipoate synthase
EOG091608LX	Aedes aegypti	7159:0007da	AAEL002111	13	0	13	27	13	0.8035	Q17J78	Similarity:Contains chitin-binding type R&R domain.
EOG091606Q5	Aedes aegypti	7159:00033a	AAEL000888	25	1	26	27	27	0.8036	Q17MV1	single stranded DNA binding protein
EOG091604TC	Aedes aegypti	7159:000b4e	AAEL003013	21	0	21	27	21	0.8037	Q17GI1	Similarity:Belongs to the protein kinase superfamily.
EOG091601I7	Aedes aegypti	7159:000ca4	AAEL003379	24	3	27	27	30	0.8039	Q17FM5	Similarity:Contains 1 SH3 domain.
EOG091601I7	Aedes aegypti	7159:003907	AAEL015419	24	3	27	27	30	0.8039	Q16E56	Similarity:Contains 1 SH3 domain.
EOG09160C91	Aedes aegypti	7159:000a43	AAEL002737	19	1	20	27	21	0.8039	Q1HQK5	Transmembrane:Helical
EOG09160C91	Aedes aegypti	7159:002b19	AAEL011514	19	1	20	27	21	0.8039	Q1HQK5	Transmembrane:Helical
EOG091600F5	Aedes aegypti	7159:001c9a	AAEL007651	24	3	27	27	30	0.804	Q171G3	phosphorylase b kinase
EOG091607CJ	Aedes aegypti	7159:002bfe	AAEL011758	22	0	22	27	22	0.804	Q16P59	Peptidyl-prolyl cis-trans isomerase
EOG091608VG	Aedes aegypti	7159:000157	AAEL000371	19	1	20	27	21	0.804	Q17PD5	Similarity:Contains 1 PDZ (DHR) domain.
EOG091601NU	Aedes aegypti	7159:0003a6	AAEL000999	26	0	26	27	26	0.8041	Q17ML5	DNA helicase
EOG0916076B	Aedes aegypti	7159:001477	AAEL005465	26	0	26	27	26	0.8041	Q179Y1	Armadillo-type fold
EOG091601DS	Aedes aegypti	7159:000d6d	AAEL003587	22	3	25	27	28	0.8042	Q17F37	Similarity:Contains 2 BTB (POZ) domains.
EOG091601DS	Aedes aegypti	7159:003697	AAEL014636	22	3	25	27	28	0.8042	Q16FU0	Similarity:Contains 2 BTB (POZ) domains.
EOG091604VW	Aedes aegypti	7159:001e07	AAEL008031	20	1	21	27	22	0.8042	Q16ZY1	carbonic anhydrase
EOG09160222	Aedes aegypti	7159:000cab	AAEL003387	25	0	25	27	25	0.8043	Q17FJ5	Transmembrane:Helical
EOG091605ZU	Aedes aegypti	7159:000cd5	AAEL003431	26	0	26	27	26	0.8043	Q17FD3	Proteasome subunit beta type
EOG091606EZ	Aedes aegypti	7159:002931	AAEL011006	26	0	26	27	26	0.8045	Q16RC6	guanylate kinase
EOG09160BMG	Aedes aegypti	7159:003579	AAEL014317	17	0	17	27	17	0.8046	Q16GP0	Transmembrane:Helical
EOG0916027J	Aedes aegypti	7159:0002d4	AAEL000780	27	0	27	27	27	0.8047	Q17NA9	Transmembrane:Helical
EOG091608IG	Aedes aegypti	7159:0001ca	AAEL000493	13	13	26	27	39	0.8047	Q17P35	heparan sulphate 6-o-sulfotransferase
EOG091603WV	Aedes aegypti	7159:00101f	AAEL004307	27	0	27	27	27	0.8048	Q17D68	n-myc downstream regulated
EOG091604BH	Aedes aegypti	7159:001083	AAEL004415	26	0	26	27	26	0.8048	Q17CW3	fuse-binding protein-interacting repressor siahbp1
EOG091602ZO	Aedes aegypti	7159:000a4d	AAEL002748	22	4	26	27	30	0.8049	Q17H99	Similarity:Belongs to the class-II aminoacyl-tRNA synthetase family.
EOG091602ZO	Aedes aegypti	7159:002b1d	AAEL011518	22	4	26	27	30	0.8049	Q16PV1	Similarity:Belongs to the class-II aminoacyl-tRNA synthetase family.
EOG091602QT	Aedes aegypti	7159:0028f3	AAEL010942	26	0	26	27	26	0.8051	Q16RI3	Kinesin-like protein
EOG091608I5	Aedes aegypti	7159:001694	AAEL006036	23	2	25	27	28	0.8051	Q177U5	phosphatase SSU72, putative
EOG091608I5	Aedes aegypti	7159:00385c	AAEL015160	23	2	25	27	28	0.8051	Q16EH7	phosphatase SSU72, putative
EOG091600EU	Aedes aegypti	7159:0030fa	AAEL013098	25	1	26	27	27	0.8052	Q16K68	Coatomer subunit alpha
EOG091600EU	Aedes aegypti	7159:0037d5	AAEL015001	25	1	26	27	27	0.8052	Q16EV4	Coatomer subunit alpha
EOG0916012N	Aedes aegypti	7159:0019cd	AAEL006895	22	5	27	27	33	0.8052	Q174J0	Phosphohexokinase
EOG0916012N	Aedes aegypti	7159:003b2e	AAEL017318	22	5	27	27	33	0.8052	NA	NA
EOG091601XT	Aedes aegypti	7159:002a10	AAEL011242	23	4	27	27	31	0.8052	Q16QM2	UDP-glucose 6-dehydrogenase
EOG091601XT	Aedes aegypti	7159:003b09	AAEL017281	23	4	27	27	31	0.8052	NA	NA
EOG091606EQ	Aedes aegypti	7159:002452	AAEL009712	24	1	25	27	26	0.8052	Q16V41	Deoxyribonuclease, TatD-related, conserved site
EOG0916072N	Aedes aegypti	7159:0032c4	CTLGA2_b	21	2	23	27	25	0.8052	Q16HZ2	Similarity:Contains C-type lectin domain.
EOG0916072N	Aedes aegypti	7159:0033ca	CTLGA2_b	21	2	23	27	25	0.8052	Q16HZ2	Similarity:Contains C-type lectin domain.
EOG091608C5	Aedes aegypti	7159:002e80	AAEL012429	16	1	17	27	18	0.8052	Q16M45	Calponin homology domain
EOG09160179	Aedes aegypti	7159:0024b2	AAEL009813	24	0	24	27	24	0.8053	Q16US4	Transmembrane:Helical
EOG091607RS	Aedes aegypti	7159:001b6b	AAEL007336	25	1	26	27	27	0.8053	Q172N5	ubiquitin-conjugating enzyme E2 q
EOG091607RS	Aedes aegypti	7159:001b6c	AAEL007337	25	1	26	27	27	0.8053	Q172N6	ubiquitin-conjugating enzyme E2 q
EOG091602JT	Aedes aegypti	7159:0019ba	AAEL006876	26	0	26	27	26	0.8054	Q174K3	Similarity:Contains 4 KH domains.
EOG091602O0	Aedes aegypti	7159:000522	AAEL001395	27	0	27	27	27	0.8054	Q17L98	Transmembrane:Helical
EOG091607TU	Aedes aegypti	7159:00165b	AAEL005974	18	7	25	27	33	0.8055	Q178A2	Similarity:Contains homeobox DNA-binding domain.
EOG09160BNL	Aedes aegypti	7159:0034dd	AAEL014158	14	0	14	27	14	0.8055	Q16H47	P-loop containing nucleoside triphosphate hydrolase
EOG0916020O	Aedes aegypti	7159:001a6f	AAEL007067	26	0	26	27	26	0.8056	Q173R0	WD-repeat protein
EOG091604BX	Aedes aegypti	7159:0006f5	AAEL001878	24	3	27	27	30	0.8056	Q17JZ0	Similarity:Belongs to the AB hydrolase superfamily. Lipase family.
EOG091603EP	Aedes aegypti	7159:000d34	AAEL003528	27	0	27	27	27	0.8058	Q0IG22	cdc73 domain protein
EOG0916059T	Aedes aegypti	7159:001d5b	AAEL007854	24	0	24	27	24	0.8058	Q170N2	Protein pelota homolog
EOG091600EV	Aedes aegypti	7159:000fe6	AAEL004246	26	0	26	27	26	0.8059	Q17DC1	Similarity:Contains 2 PH domains.
EOG091602CU	Aedes aegypti	7159:00366d	CYP301A1	25	0	25	27	25	0.8059	Q16FY4	Similarity:Belongs to the cytochrome P450 family.
EOG091602HD	Aedes aegypti	7159:0012eb	AAEL005046	24	2	26	27	28	0.8059	Q17B91	splicing factor
EOG0916080D	Aedes aegypti	7159:003cc3	AAEL018144	19	0	19	27	19	0.8059	NA	NA
EOG091600ZF	Aedes aegypti	7159:001ff6	AAEL008542	26	0	26	27	26	0.806	Q16YJ5	Kinesin-like protein
EOG091601QF	Aedes aegypti	7159:0019b2	AAEL006868	23	4	27	27	31	0.806	Q174J9	Similarity:Belongs to the protein kinase superfamily. AGC Ser/Thr protein kinase family. GPRK subfamily.
EOG091601X3	Aedes aegypti	7159:003585	AAEL014329	25	1	26	27	27	0.8062	Q16GM6	mixed lineage protein kinase
EOG091600PG	Aedes aegypti	7159:00046e	AAEL001206	25	1	26	27	27	0.8064	Q17LW8	Similarity:Belongs to the class-II aminoacyl-tRNA synthetase family.
EOG091600W0	Aedes aegypti	7159:001ebd	AAEL008216	27	0	27	27	27	0.8064	Q16ZG5	Aconitate hydratase
EOG091607AP	Aedes aegypti	7159:002e95	AAEL012451	24	1	25	27	26	0.8065	Q16M18	Potassium channel tetramerisation-type BTB domain
EOG09160C50	Aedes aegypti	7159:000d3a	AAEL003534	14	0	14	27	14	0.8068	Q0IG15	Arf GTPase activating protein
EOG0916030T	Aedes aegypti	7159:002e6d	AAEL012409	26	1	27	27	28	0.8069	Q16M65	pantothenate kinase
EOG091603EW	Aedes aegypti	7159:0008b8	eIF3-S6	23	0	23	27	23	0.8069	Q1HQY6	Eukaryotic translation initiation factor 3 subunit 6
EOG091602NP	Aedes aegypti	7159:003155	AAEL013194	27	0	27	27	27	0.807	Q16JV7	Tetratricopeptide-like helical domain
EOG0916001O	Aedes aegypti	7159:001f53	AAEL008371	25	2	27	27	29	0.8071	Q16Z01	neurofibromin
EOG0916003M	Aedes aegypti	7159:0000b4	AAEL000194	26	0	26	27	26	0.8071	Q17PY3	Similarity:Contains PI3K/PI4K domain.
EOG091605AK	Aedes aegypti	7159:001ac8	AAEL007164	26	1	27	27	28	0.8072	Q173H4	Arrestin C-terminal-like domain
EOG091601SQ	Aedes aegypti	7159:002d6a	AAEL012141	24	2	26	27	28	0.8073	Q16MZ8	Carboxylic ester hydrolase
EOG091606BO	Aedes aegypti	7159:000211	AAEL000568	16	1	17	27	18	0.8073	Q17NV4	26S proteasome non-ATPase regulatory subunit
EOG091606BO	Aedes aegypti	7159:000fa2	AAEL004173	16	1	17	27	18	0.8073	Q17NV4	26S proteasome non-ATPase regulatory subunit
EOG0916017F	Aedes aegypti	7159:0032a0	AAEL013530	27	0	27	27	27	0.8074	Q16IV9	Similarity:Belongs to the cullin family.
EOG091603PR	Aedes aegypti	7159:000290	AAEL000704	21	3	24	27	27	0.8074	Q17NH1	Similarity:Contains 1 C2 domain.
EOG09160334	Aedes aegypti	7159:00352a	AAEL014238	20	1	21	27	22	0.8075	Q16GW0	Similarity:Belongs to the group II decarboxylase family.
EOG091605I9	Aedes aegypti	7159:00272b	AAEL010463	17	4	21	27	25	0.8076	Q16SX0	Similarity:Contains homeobox DNA-binding domain.
EOG091605I9	Aedes aegypti	7159:0038de	AAEL015355	17	4	21	27	25	0.8076	Q16E75	Similarity:Contains homeobox DNA-binding domain.
EOG091606NX	Aedes aegypti	7159:001a93	AAEL007105	25	0	25	27	25	0.8076	Q173M0	BTB/POZ domain
EOG091600J9	Aedes aegypti	7159:0012aa	AAEL004981	27	0	27	27	27	0.8078	Q17BG5	Phospholipid-transporting ATPase
EOG091600TY	Aedes aegypti	7159:0035e0	AAEL014426	25	2	27	27	29	0.8078	Q16GC4	glycine dehydrogenase
EOG091600TY	Aedes aegypti	7159:0039a1	AAEL015628	25	2	27	27	29	0.8078	Q1DGH8	glycine dehydrogenase
EOG0916018A	Aedes aegypti	7159:000ac0	AAEL002869	25	1	26	27	27	0.8078	Q17GV4	Transmembrane:Helical
EOG0916016J	Aedes aegypti	7159:001992	AAEL006834	27	0	27	27	27	0.8081	Q174N2	glutamate semialdehyde dehydrogenase
EOG091601R4	Aedes aegypti	7159:000a88	AAEL002810	27	0	27	27	27	0.8082	Q17H38	DNA helicase
EOG09160APO	Aedes aegypti	7159:002546	AAEL009964	20	0	20	27	20	0.8082	Q1HQH2	ATPase, F0 complex, subunit E, mitochondrial
EOG091603JC	Aedes aegypti	7159:000474	AAEL001212	24	3	27	27	30	0.8083	Q17LW2	phosphoinositide-binding protein, putative
EOG091605OT	Aedes aegypti	7159:0000f4	GPRNNA21	27	0	27	27	27	0.8083	Q17PM8	Transmembrane:Helical
EOG091600TZ	Aedes aegypti	7159:002f2a	AAEL012616	25	1	26	27	27	0.8084	Q16LL0	Transmembrane:Helical
EOG091605Z5	Aedes aegypti	7159:00329f	AAEL013529	21	0	21	27	21	0.8084	Q16IW8	synapsin
EOG09160619	Aedes aegypti	7159:002df3	AAEL012282	26	1	27	27	28	0.8084	Q16HQ0	prohibitin
EOG09160619	Aedes aegypti	7159:00341b	AAEL013952	26	1	27	27	28	0.8084	Q16HQ0	prohibitin
EOG091606C2	Aedes aegypti	7159:0029d8	AAEL011184	14	13	27	27	40	0.8085	Q16QS3	Similarity:Belongs to the mitochondrial carrier (TC 2.A.29) family.
EOG091600G6	Aedes aegypti	7159:000e05	AAEL003743	24	0	24	27	24	0.8086	Q0IFY3	V-type proton ATPase subunit a
EOG0916014W	Aedes aegypti	7159:0027dc	RNR1	26	1	27	27	28	0.8086	Q8WRS8	Ribonucleoside-diphosphate reductase
EOG091602QV	Aedes aegypti	7159:001533	AAEL005666	27	0	27	27	27	0.8086	Q179D2	matrix metalloproteinase
EOG091602QA	Aedes aegypti	7159:0023f6	AAEL009617	25	1	26	27	27	0.8088	Q16FL6	Eukaryotic translation initiation factor 3 subunit L
EOG091602QA	Aedes aegypti	7159:0036de	AAEL014715	25	1	26	27	27	0.8088	Q16FL6	Eukaryotic translation initiation factor 3 subunit L
EOG091607GQ	Aedes aegypti	7159:000699	AAEL001783	24	2	26	27	29	0.809	Q17K80	MSF1 protein, putative
EOG091607GQ	Aedes aegypti	7159:0033e4	AAEL013880	24	2	26	27	29	0.809	Q16HW5	MSF1 protein, putative
EOG09160CRX	Aedes aegypti	7159:003ab2	AAEL017191	11	0	11	27	11	0.809	NA	NA
EOG0916074H	Aedes aegypti	7159:000134	AAEL000332	17	2	19	27	22	0.8092	Q17PI5	Peptidase M76, ATP23
EOG091600RV	Aedes aegypti	7159:000cfd	AAEL003472	27	0	27	27	27	0.8093	Q17FC6	Transmembrane:Helical
EOG091604QU	Aedes aegypti	7159:001b9d	AAEL007390	17	0	17	27	17	0.8093	Q172F3	Similarity:Belongs to the NAD(P)-dependent epimerase/dehydratase family.
EOG091606IV	Aedes aegypti	7159:001661	AAEL005980	24	1	25	27	26	0.8093	Q178A0	Transmembrane:Helical
EOG09160CDG	Aedes aegypti	7159:00139f	AAEL005232	16	3	19	27	23	0.8093	Q17AP8	Cyclin-dependent kinases regulatory subunit
EOG09160A3D	Aedes aegypti	7159:00334e	AAEL013722	23	0	23	27	23	0.8095	Q16IC2	partner of burs, putative
EOG091601UT	Aedes aegypti	7159:000f14	AAEL004021	1	26	27	27	76	0.8096	Q17DW5	Similarity:Belongs to the GMC oxidoreductase family.
EOG091601UT	Aedes aegypti	7159:000f23	AAEL004036	1	26	27	27	76	0.8096	Q17DW1	Similarity:Belongs to the GMC oxidoreductase family.
EOG091601UT	Aedes aegypti	7159:001597	AAEL005769	1	26	27	27	76	0.8096	Q178U1	Similarity:Belongs to the GMC oxidoreductase family.
EOG091605BC	Aedes aegypti	7159:00043e	AAEL001158	18	0	18	27	18	0.8097	Q17M22	Similarity:Belongs to the FBPase class 1 family.
EOG09160A9M	Aedes aegypti	7159:00244e	AAEL009708	20	0	20	27	20	0.8098	Q16V30	thioredoxin M, putative
EOG091601N0	Aedes aegypti	7159:001960	GPRFZ2	26	1	27	27	29	0.81	Q174W8	Similarity:Contains FZ (frizzled) domain.
EOG0916027L	Aedes aegypti	7159:0011bf	AAEL004739	13	0	13	27	13	0.81	Q17BX4	Similarity:Belongs to the acyl-CoA dehydrogenase family.
EOG091601FU	Aedes aegypti	7159:000cf7	AAEL003466	26	1	27	27	28	0.8101	Q17F91	Similarity:Belongs to the cullin family.
EOG091604O8	Aedes aegypti	7159:001048	AAEL004351	24	3	27	27	30	0.8101	Q17D24	Similarity:Belongs to the protein kinase superfamily.
EOG091606YV	Aedes aegypti	7159:0010e5	AAEL004515	25	0	25	27	25	0.8101	Q17CL2	Transmembrane:Helical
EOG091601G6	Aedes aegypti	7159:001d8c	AAEL007904	25	1	26	27	27	0.8102	Q170J6	cleavage and polyadenylation specificity factor
EOG091603RS	Aedes aegypti	7159:0008f7	mAAT	26	1	27	27	28	0.8102	Q5K6H3	Aspartate aminotransferase
EOG091605KF	Aedes aegypti	7159:0029aa	AAEL011136	26	1	27	27	28	0.8102	Q16MG9	Arsenical pump-driving ATPase homolog
EOG091605KF	Aedes aegypti	7159:002e15	AAEL012316	26	1	27	27	28	0.8102	Q16MG9	Arsenical pump-driving ATPase homolog
EOG091604UY	Aedes aegypti	7159:0011df	AAEL004773	25	0	25	27	25	0.8103	Q17BX2	Region:S-adenosyl-L-methionine binding
EOG0916055U	Aedes aegypti	7159:0019bd	AAEL006879	24	1	25	27	26	0.8103	Q174H6	Similarity:Belongs to the mitochondrial carrier (TC 2.A.29) family.
EOG091606J8	Aedes aegypti	7159:0002af	AAEL000738	24	0	24	27	24	0.8103	Q17NC8	RAVE subunit 2/Rogdi
EOG09160FZL	Aedes aegypti	7159:0009eb	AAEL002648	2	0	2	27	2	0.8103	Q17HK8	Glycoside hydrolase family 47
EOG091603KO	Aedes aegypti	7159:002f23	AAEL012609	15	1	16	27	17	0.8104	Q16LL9	Similarity:Belongs to the class-III pyridoxal-phosphate-dependent aminotransferase family.
EOG091603KO	Aedes aegypti	7159:00376f	AAEL014886	15	1	16	27	17	0.8104	Q16F64	Similarity:Belongs to the class-III pyridoxal-phosphate-dependent aminotransferase family.
EOG091605QW	Aedes aegypti	7159:002e1a	AAEL012321	26	1	27	27	28	0.8104	Q16MF1	NA
EOG091605QW	Aedes aegypti	7159:00326b	AAEL013477	26	1	27	27	28	0.8104	Q16J09	NA
EOG091608LM	Aedes aegypti	7159:000b17	AAEL002957	23	3	26	27	29	0.8106	Q17GM1	Transmembrane:Helical
EOG091608LM	Aedes aegypti	7159:0035c3	AAEL014393	23	3	26	27	29	0.8106	Q16GF9	lactoylglutathione lyase
EOG0916092Q	Aedes aegypti	7159:0019b6	AAEL006872	25	1	26	27	27	0.8106	Q174L5	Transgelin
EOG09160FOX	Aedes aegypti	7159:00328e	AAEL013512	2	0	2	27	2	0.8106	Q16IX6	Similarity:Contains chitin-binding type R&R domain.
EOG0916046N	Aedes aegypti	7159:0031f7	AAEL013359	25	0	25	27	25	0.8107	Q16JE7	Similarity:Belongs to the DEAD box helicase family.
EOG091605H6	Aedes aegypti	7159:002e23	AAEL012330	23	1	24	27	25	0.8107	Q16ME4	tata-box binding protein
EOG091607DS	Aedes aegypti	7159:001818	AAEL006441	24	0	24	27	24	0.8107	Q176C3	Proteasome subunit beta type
EOG09160008	Aedes aegypti	7159:0013f5	AAEL005324	25	0	25	27	25	0.8108	Q17AE9	titin
EOG091600ES	Aedes aegypti	7159:002ff2	AAEL012825	26	0	26	27	26	0.8108	Q16KZ1	bifunctional purine biosynthesis protein
EOG0916032B	Aedes aegypti	7159:00281d	AAEL010710	26	1	27	27	28	0.8109	Q16S42	Similarity:Belongs to the ligand-gated ion channel (TC 1.A.9) family.
EOG0916081N	Aedes aegypti	7159:0000bd	AAEL000208	22	0	22	27	22	0.8111	Q17PZ5	Similarity:Belongs to the EMP24/GP25L family.
EOG091600VD	Aedes aegypti	7159:002b2d	AAEL011534	26	1	27	27	28	0.8112	Q16PT8	Similarity:Contains helicase ATP-binding domain.
EOG0916051C	Aedes aegypti	7159:001b95	AAEL007382	25	0	25	27	25	0.8114	Q1HQK6	serine-threonine kinase receptor-associated protein (strap)
EOG091605ZL	Aedes aegypti	7159:003383	AAEL013778	26	1	27	27	28	0.8114	Q16I64	F-actin capping protein alpha
EOG0916068P	Aedes aegypti	7159:00208d	AAEL008701	15	2	17	27	19	0.8114	Q16XZ8	myoinositol oxygenase
EOG091609Q1	Aedes aegypti	7159:002b60	AAEL011587	18	3	21	27	24	0.8114	Q16FB1	60S ribosomal protein L27
EOG091609Q1	Aedes aegypti	7159:003743	AAEL014838	18	3	21	27	24	0.8114	Q16FB1	60S ribosomal protein L27
EOG091608QQ	Aedes aegypti	7159:00215f	AAEL008924	26	0	26	27	26	0.8115	Q16XB0	Transmembrane:Helical
EOG09160C6E	Aedes aegypti	7159:001ad8	AAEL007184	21	1	22	27	23	0.8115	Q173D4	vacuolar ATP synthase subunit g
EOG09160C6E	Aedes aegypti	7159:0031c0	AAEL013302	21	1	22	27	23	0.8115	Q16JK6	vacuolar ATP synthase subunit g
EOG0916034E	Aedes aegypti	7159:00272a	AAEL010462	25	1	26	27	27	0.8116	Q16SX3	Transmembrane:Helical
EOG09160FEK	Aedes aegypti	7159:002530	AAEL009942	2	0	2	27	2	0.8116	Q16UC7	Immunoglobulin I-set
EOG0916026N	Aedes aegypti	7159:000f35	CYP4G36	24	0	24	27	24	0.8117	Q17DS9	Similarity:Belongs to the cytochrome P450 family.
EOG091609S1	Aedes aegypti	7159:003193	AAEL013256	24	0	24	27	24	0.8117	Q16JP7	Protein of unknown function DUF1674
EOG091603HZ	Aedes aegypti	7159:001526	AAEL005651	22	0	22	27	22	0.8118	Q179F9	ethanolamine-phosphate cytidylyltransferase
EOG0916049Z	Aedes aegypti	7159:00378c	AAEL014915	23	0	23	27	23	0.8118	Q16F31	Similarity:Contains PCI domain.
EOG091606QR	Aedes aegypti	7159:001bcf	AAEL007441	25	0	25	27	25	0.812	Q1HRN7	Transmembrane:Helical
EOG091607C0	Aedes aegypti	7159:002ba7	AAEL011667	25	2	27	27	29	0.812	Q1DH48	cir
EOG091607C0	Aedes aegypti	7159:00383b	AAEL015120	25	2	27	27	29	0.812	Q1DH48	cir
EOG0916006G	Aedes aegypti	7159:001569	AAEL005720	27	0	27	27	27	0.8121	Q0IFD7	Domain of unknown function DUF4062
EOG091607DT	Aedes aegypti	7159:001fc3	AAEL008489	22	2	24	27	27	0.8121	Q1HQR5	calcyphosine/tpp
EOG091602EJ	Aedes aegypti	7159:000d67	AAEL003581	25	1	26	27	27	0.8122	Q17F21	Glutamine phosphoribosylpyrophosphate amidotransferase
EOG09160395	Aedes aegypti	7159:002ac2	AAEL011425	26	0	26	27	26	0.8122	Q0IEB2	structure-specific recognition protein
EOG09160A58	Aedes aegypti	7159:000465	AAEL001197	11	0	11	27	11	0.8124	Q17LY8	Fibronectin type III
EOG09160F4N	Aedes aegypti	7159:000dcd	AAEL003687	0	2	2	27	4	0.8124	Q17ER8	Histone H2A
EOG09160F4N	Aedes aegypti	7159:000de0	AAEL003706	0	2	2	27	4	0.8124	Q17ER8	Histone H2A
EOG091603DH	Aedes aegypti	7159:003277	AAEL013489	25	0	25	27	25	0.8125	Q16J00	Transmembrane:Helical
EOG091604MZ	Aedes aegypti	7159:000f9c	AAEL004167	22	2	24	27	26	0.8125	Q0IFQ3	Similarity:Contains 1 KH domain.
EOG09160BOJ	Aedes aegypti	7159:003a9a	AAEL017166	7	0	7	27	7	0.8125	NA	GPCR Dopamine Family
EOG09160CAR	Aedes aegypti	7159:001bc5	AAEL007431	22	1	23	27	24	0.8125	Q0IF00	H/ACA ribonucleoprotein complex, subunit Nop10
EOG091606CE	Aedes aegypti	7159:00387c	AAEL015234	10	12	22	27	36	0.8126	Q16EE9	Homeobox domain
EOG091606CE	Aedes aegypti	7159:003ccd	AAEL018154	10	12	22	27	36	0.8126	NA	NA
EOG091605SG	Aedes aegypti	7159:000c88	AAEL003347	27	0	27	27	27	0.8127	Q17FQ8	Similarity:Contains CRAL-TRIO domain.
EOG091605T7	Aedes aegypti	7159:0015f7	Fen1	24	1	25	27	26	0.8127	Q178M1	Flap structure-specific endonuclease 1
EOG091608J9	Aedes aegypti	7159:002cae	AAEL011945	15	1	16	27	17	0.8127	Q16NK1	Similarity:Contains 1 PDZ (DHR) domain.
EOG09160FUF	Aedes aegypti	7159:003572	AAEL014310	1	1	2	27	3	0.8127	Q16GP4	NA
EOG0916026M	Aedes aegypti	7159:00258c	AAEL010037	26	0	26	27	26	0.8129	Q16U43	Similarity:Belongs to the phosphohexose mutase family.
EOG091605J6	Aedes aegypti	7159:000b5d	AAEL003028	19	0	19	27	19	0.813	Q0IGC1	Similarity:Belongs to the ligand-gated ion channel (TC 1.A.9) family.
EOG09160114	Aedes aegypti	7159:00104e	AAEL004357	26	0	26	27	26	0.8131	Q17CZ1	neuroligin,
EOG09160598	Aedes aegypti	7159:0027f4	AAEL010668	22	1	23	27	24	0.8131	Q16S95	quinone oxidoreductase
EOG091605S0	Aedes aegypti	7159:001ec8	AAEL008227	25	0	25	27	25	0.8131	Q16ZD7	Transmembrane:Helical
EOG0916015S	Aedes aegypti	7159:001e1f	AAEL008056	13	14	27	27	49	0.8132	Q16ZU7	Similarity:Contains cyclic nucleotide-binding domain.
EOG091604ID	Aedes aegypti	7159:001c34	AAEL007546	25	1	26	27	27	0.8133	Q171R5	actin-related protein 2/3 complex subunit 1A
EOG0916054H	Aedes aegypti	7159:00112f	AAEL004589	21	3	24	27	27	0.8133	Q17CE6	Similarity:Belongs to the mitochondrial carrier (TC 2.A.29) family.
EOG0916067J	Aedes aegypti	7159:001790	AAEL006302	21	2	23	27	25	0.8133	Q176P5	spire
EOG09160791	Aedes aegypti	7159:00070c	AAEL001901	23	3	26	27	29	0.8136	Q17JX3	MRAS2, putative
EOG09160108	Aedes aegypti	7159:0000c5	AAEL000217	26	1	27	27	28	0.8137	Q17Q09	serine/threonine protein kinase
EOG0916015V	Aedes aegypti	7159:001899	AAEL006577	27	0	27	27	27	0.8137	Q175Q3	Similarity:Belongs to the class-II aminoacyl-tRNA synthetase family.
EOG091605I5	Aedes aegypti	7159:0007c3	AAEL002088	17	0	17	27	17	0.8137	Q17J69	Transmembrane:Helical
EOG091606FR	Aedes aegypti	7159:000efa	AAEL003993	25	1	26	27	27	0.8137	Q17E10	Similarity:Belongs to the enoyl-CoA hydratase/isomerase family.
EOG091606W5	Aedes aegypti	7159:00246d	AAEL009739	20	5	25	27	30	0.8137	Q16UZ9	cbl-d
EOG09160A6A	Aedes aegypti	7159:001e17	AAEL008048	17	2	19	27	21	0.8138	Q16ZX0	Transmembrane:Helical
EOG091609B5	Aedes aegypti	7159:00008d	AAEL000149	26	0	26	27	26	0.8139	Q17Q39	Histone deacetylase complex subunit SAP30 homolog
EOG091607ZM	Aedes aegypti	7159:0028cb	AAEL010898	24	1	25	27	26	0.814	Q16RP0	Transmembrane:Helical
EOG09160168	Aedes aegypti	7159:001a36	AAEL007007	25	1	26	27	27	0.8141	Q173T8	DNA helicase
EOG091609TT	Aedes aegypti	7159:002363	AAEL009467	24	2	26	27	28	0.8141	Q16VR4	Similarity:Contains ADF-H domain.
EOG09160171	Aedes aegypti	7159:002dde	AAEL012259	25	2	27	27	29	0.8143	Q16MM1	NA
EOG091602H2	Aedes aegypti	7159:000fd8	AAEL004232	27	0	27	27	27	0.8143	Q17DF0	pre-mRNA splicing factor prp17
EOG09160BM1	Aedes aegypti	7159:001ede	AAEL008249	23	0	23	27	23	0.8144	Q16ZB5	Transmembrane:Helical
EOG091600FA	Aedes aegypti	7159:00282c	AAEL010725	25	2	27	27	29	0.8145	Q16S29	Similarity:Belongs to the peptidase S8 family.
EOG091604FH	Aedes aegypti	7159:0037b1	AAEL014961	26	1	27	27	30	0.8145	Q16EZ3	gdp mannose-4,6-dehydratase
EOG09160AM0	Aedes aegypti	7159:002796	AAEL010572	22	3	25	27	28	0.8146	Q16PT9	late endosomal/lysosomal MP1 interacting protein, putative
EOG09160AM0	Aedes aegypti	7159:002b28	AAEL011529	22	3	25	27	28	0.8146	Q16PT9	late endosomal/lysosomal MP1 interacting protein, putative
EOG091603MV	Aedes aegypti	7159:0006fe	AAEL001887	24	0	24	27	24	0.8147	Q17JX2	Glutamine synthetase
EOG09160771	Aedes aegypti	7159:0008a0	AAEL002309	26	0	26	27	26	0.8147	Q17IM5	Thioredoxin Peroxidase.
EOG09160040	Aedes aegypti	7159:003713	AAEL014768	27	0	27	27	27	0.8148	Q16FG2	glutamate synthase
EOG091600JR	Aedes aegypti	7159:0014d4	AAEL005561	26	1	27	27	28	0.8148	Q179M3	Calcium-transporting ATPase
EOG091603P3	Aedes aegypti	7159:002bac	AAEL011673	25	1	26	27	27	0.8148	Q1DH49	Similarity:Contains PCI domain.
EOG091603P3	Aedes aegypti	7159:00383d	AAEL015122	25	1	26	27	27	0.8148	Q1DH49	Similarity:Contains PCI domain.
EOG091609IY	Aedes aegypti	7159:000444	AAEL001164	21	2	23	27	25	0.8148	Q17M02	NADH:ubiquinone dehydrogenase, putative
EOG09160BEQ	Aedes aegypti	7159:002fec	AAEL012819	25	0	25	27	25	0.8148	Q1HQI4	vacuolar ATP synthase subunit g
EOG09160414	Aedes aegypti	7159:001c44	AAEL007562	24	2	26	27	28	0.8149	Q171Q5	Transmembrane:Helical
EOG091605K2	Aedes aegypti	7159:00150b	GPROP5	5	11	16	27	38	0.8149	Q179G9	Similarity:Belongs to the G-protein coupled receptor 1 family. Opsin subfamily.
EOG091605K2	Aedes aegypti	7159:00150f	GPROP4	5	11	16	27	38	0.8149	Q179G8	Similarity:Belongs to the G-protein coupled receptor 1 family. Opsin subfamily.
EOG091605K2	Aedes aegypti	7159:00176c	GPROP2	5	11	16	27	38	0.8149	Q176U4	Similarity:Belongs to the G-protein coupled receptor 1 family. Opsin subfamily.
EOG091605K2	Aedes aegypti	7159:001843	GPROP3	5	11	16	27	38	0.8149	Q175W7	Similarity:Belongs to the G-protein coupled receptor 1 family. Opsin subfamily.
EOG091605K2	Aedes aegypti	7159:001850	GPROP1	5	11	16	27	38	0.8149	Q175W8	Similarity:Belongs to the G-protein coupled receptor 1 family. Opsin subfamily.
EOG091607OL	Aedes aegypti	7159:00050a	AAEL001371	17	8	25	27	35	0.815	Q17DC9	pre-mRNA cleavage factor im, 25kD subunit
EOG091607OL	Aedes aegypti	7159:000ff1	AAEL004257	17	8	25	27	35	0.815	Q17DC8	Enkurin
EOG091607OL	Aedes aegypti	7159:000ff4	AAEL004261	17	8	25	27	35	0.815	Q17DC7	Enkurin
EOG091607OL	Aedes aegypti	7159:000ff9	AAEL004266	17	8	25	27	35	0.815	Q17DC9	pre-mRNA cleavage factor im, 25kD subunit
EOG09160BOD	Aedes aegypti	7159:0024e6	AAEL009866	15	0	15	27	15	0.8151	Q16UL7	Zona pellucida domain
EOG091601KN	Aedes aegypti	7159:0012c6	AAEL005009	24	0	24	27	24	0.8152	Q17BC6	groucho protein (enhancer of split)
EOG09160AXG	Aedes aegypti	7159:000bad	AAEL003112	25	0	25	27	25	0.8153	Q17GC7	Similarity:Contains chitin-binding type R&R domain.
EOG0916003K	Aedes aegypti	7159:0029db	AAEL011187	27	0	27	27	27	0.8154	Q16QS5	U520
EOG091601N8	Aedes aegypti	7159:000005	AAEL000006	23	3	26	27	31	0.8154	Q0C737	phosphoenolpyruvate carboxykinase
EOG091601N8	Aedes aegypti	7159:000018	AAEL000025	23	3	26	27	31	0.8154	Q0C736	phosphoenolpyruvate carboxykinase
EOG091601N8	Aedes aegypti	7159:00004c	AAEL000080	23	3	26	27	31	0.8154	Q0C735	phosphoenolpyruvate carboxykinase
EOG091602FP	Aedes aegypti	7159:000410	AAEL001108	25	1	26	27	27	0.8155	Q17M58	Protein kinase C
EOG091604EJ	Aedes aegypti	7159:001e39	AAEL008084	25	1	26	27	27	0.8155	Q16ZQ9	Similarity:Contains JmjC domain.
EOG091604EJ	Aedes aegypti	7159:003304	AAEL013632	25	1	26	27	27	0.8155	Q16IK6	Similarity:Contains JmjC domain.
EOG0916081X	Aedes aegypti	7159:0026cb	AAEL010361	23	0	23	27	23	0.8155	Q16T78	Transmembrane:Helical
EOG091609CB	Aedes aegypti	7159:0008dd	AAEL002372;RpS11	25	1	26	27	27	0.8155	Q17IE1	40S ribosomal protein S11
EOG091601HU	Aedes aegypti	7159:0005f7	AAEL001616	22	0	22	27	22	0.8156	Q17KM8	Similarity:Belongs to the AAA ATPase family.
EOG091606C1	Aedes aegypti	7159:001472	AAEL005457	27	0	27	27	27	0.8156	Q179Z6	Transmembrane:Helical
EOG091609XP	Aedes aegypti	7159:0020ce	AAEL008768	25	0	25	27	25	0.8156	Q16XS9	multiprotein bridging factor, putative
EOG091609P4	Aedes aegypti	7159:0002b3	AAEL000744	24	0	24	27	24	0.8157	Q17NC9	troponin C
EOG09160AH2	Aedes aegypti	7159:0028b8	AAEL010879	21	0	21	27	21	0.8157	Q16RP8	Transmembrane:Helical
EOG0916037S	Aedes aegypti	7159:001f42	AAEL008354	23	4	27	27	31	0.8158	Q0IEP7	Similarity:Belongs to the ligand-gated ion channel (TC 1.A.9) family.
EOG0916009T	Aedes aegypti	7159:0032a4	AAEL013534	23	2	25	27	27	0.816	Q16IV4	tgf-beta resistance-associated protein trag
EOG091601YZ	Aedes aegypti	7159:002801	AAEL010681	26	0	26	27	26	0.816	Q16S73	Transporter
EOG0916039V	Aedes aegypti	7159:001383	AAEL005204	24	0	24	27	24	0.816	Q17AU9	Transmembrane:Helical
EOG091604BF	Aedes aegypti	7159:000906	AAEL002415	24	1	25	27	26	0.8161	Q17I98	Similarity:Contains 5 LIM zinc-binding domains.
EOG091604UJ	Aedes aegypti	7159:0003aa	AAEL001005	26	1	27	27	28	0.8161	Q17MI1	Similarity:Belongs to the calreticulin family.
EOG091604UJ	Aedes aegypti	7159:002c0d	AAEL011773	26	1	27	27	28	0.8161	Q16P38	Similarity:Belongs to the calreticulin family.
EOG091604ZP	Aedes aegypti	7159:002754	AAEL010506	25	1	26	27	27	0.8161	Q16SS2	GTP-binding protein alpha subunit, gna
EOG091608G5	Aedes aegypti	7159:002288	AAEL009235	22	1	23	27	24	0.8161	Q16WE8	Similarity:Contains 1 CSD (cold-shock) domain.
EOG091602K6	Aedes aegypti	7159:0010ea	AAEL004520	25	1	26	27	27	0.8164	Q17CK8	cAMP/cgmp cyclic nucleotide phosphodiesterase
EOG0916038Z	Aedes aegypti	7159:000eaf	AAEL003918	13	12	25	27	38	0.8164	Q17E58	calcium-dependent protein kinase
EOG09160ADI	Aedes aegypti	7159:00091d	AAEL002438	20	1	21	27	22	0.8164	Q17I69	NA
EOG091604B7	Aedes aegypti	7159:000e1d	AAEL003769	26	1	27	27	28	0.8165	Q0IFY5	Methionine aminopeptidase
EOG091605FT	Aedes aegypti	7159:002dcd	AAEL012240	27	0	27	27	27	0.8165	Q16MP1	protein transport protein sec13
EOG091601JQ	Aedes aegypti	7159:002ef1	AAEL012552	22	3	25	27	28	0.8166	Q16LR5	Similarity:Belongs to the complex I 75 kDa subunit family.
EOG091601NS	Aedes aegypti	7159:001919	AAEL006707	27	0	27	27	27	0.8168	Q175B5	Peptidase M8, leishmanolysin
EOG091602O9	Aedes aegypti	7159:001860	AAEL006516	26	0	26	27	26	0.8168	Q0IF50	vacuolar ATP synthase subunit h
EOG091603O7	Aedes aegypti	7159:00119a	AAEL004700	24	3	27	27	30	0.8168	Q0IFK7	cdkl1/4
EOG091600NZ	Aedes aegypti	7159:002179	AAEL008950	27	0	27	27	27	0.8169	Q16X86	Histidine phosphatase superfamily
EOG091601JD	Aedes aegypti	7159:000b93	AAEL003083	25	0	25	27	25	0.8169	Q0IG62	Similarity:Contains myotubularin phosphatase domain.
EOG091607KO	Aedes aegypti	7159:0014f8	AAEL005599	18	8	26	27	35	0.8169	Q179I1	defective proboscis extension response, putative
EOG09160847	Aedes aegypti	7159:001d6c	AAEL007871	24	0	24	27	24	0.817	Q170M2	Anaphase-promoting complex subunit 10
EOG091608HJ	Aedes aegypti	7159:001d72	AAEL007877	24	1	25	27	26	0.8171	Q170L2	CWC16 protein
EOG091608UF	Aedes aegypti	7159:002417	AAEL009651	25	1	26	27	27	0.8171	Q0IEK4	Similarity:Contains NAC-A/B (NAC-alpha/beta) domain.
EOG091608UF	Aedes aegypti	7159:002bd1	AAEL011711	25	1	26	27	27	0.8171	Q16PA5	Similarity:Contains NAC-A/B (NAC-alpha/beta) domain.
EOG091603PC	Aedes aegypti	7159:00152a	AAEL005657	22	0	22	27	22	0.8172	Q179F1	Arrestin C-terminal-like domain
EOG091604ZE	Aedes aegypti	7159:00286a	AAEL010791	25	0	25	27	25	0.8173	Q16RY0	Autophagy-specific protein, putative
EOG091607JW	Aedes aegypti	7159:00166c	AAEL005994	21	1	22	27	25	0.8173	Q177Y3	Transmembrane:Helical
EOG0916022W	Aedes aegypti	7159:00038c	AAEL000971	26	0	26	27	26	0.8174	Q17MP0	Transmembrane:Helical
EOG0916047D	Aedes aegypti	7159:0039dd	AAEL016968	24	2	26	27	28	0.8174	NA	NA
EOG0916047D	Aedes aegypti	7159:003b3c	AAEL017333	24	2	26	27	28	0.8174	NA	NA
EOG091607ZB	Aedes aegypti	7159:003ab5	AAEL017194	22	0	22	27	22	0.8175	NA	NA
EOG091601QQ	Aedes aegypti	7159:0010fc	AAEL004538	23	1	24	27	25	0.8176	Q17CM9	Protein-UDP acetylgalactosaminyltransferase
EOG0916022J	Aedes aegypti	7159:001450	AAEL005422	25	1	26	27	27	0.8176	Q17A27	Similarity:Belongs to the aldehyde dehydrogenase family.
EOG0916022J	Aedes aegypti	7159:0033b5	AAEL013831	25	1	26	27	27	0.8176	Q16I13	Similarity:Belongs to the aldehyde dehydrogenase family.
EOG0916063M	Aedes aegypti	7159:0004e7	AAEL001334	25	0	25	27	25	0.8177	Q17LJ2	geranylgeranyl transferase type ii beta subunit
EOG0916098F	Aedes aegypti	7159:000402	AAEL001094	26	1	27	27	28	0.8177	Q17MD5	Similarity:Belongs to the small heat shock protein (HSP20) family.
EOG0916098F	Aedes aegypti	7159:003820	AAEL015090	26	1	27	27	28	0.8177	Q16EM9	Similarity:Belongs to the small heat shock protein (HSP20) family.
EOG0916001Y	Aedes aegypti	7159:000178	AAEL000405	24	2	26	27	28	0.8178	Q0IGG1	Transmembrane:Helical
EOG09160071	Aedes aegypti	7159:003480	AAEL014053	24	1	25	27	26	0.8178	Q16HE2	V-type proton ATPase subunit a
EOG091600C6	Aedes aegypti	7159:000cb8	AAEL003402	26	0	26	27	26	0.8178	Q17FG8	Sphingomyelin phosphodiesterase
EOG091606RZ	Aedes aegypti	7159:00335d	AAEL013737	25	0	25	27	25	0.8178	Q16IA9	axonemal inner arm dynein light chain
EOG0916079L	Aedes aegypti	7159:001e74	AAEL008143	22	2	24	27	26	0.8178	Q16H50	Cytosolic Fe-S cluster assembly factor NUBP2 homolog
EOG0916079L	Aedes aegypti	7159:0034d9	AAEL014154	22	2	24	27	26	0.8178	Q16H50	Cytosolic Fe-S cluster assembly factor NUBP2 homolog
EOG091608LG	Aedes aegypti	7159:000b2d	AAEL002980	23	0	23	27	23	0.8178	Q16H40	U1 small nuclear ribonucleoprotein A
EOG091600W5	Aedes aegypti	7159:0034f1	AAEL014178	25	2	27	27	29	0.8179	Q16H29	DNA polymerase
EOG09160400	Aedes aegypti	7159:001444	AAEL005410	25	1	26	27	27	0.818	Q17A38	Similarity:Contains CTLH domain.
EOG091606BB	Aedes aegypti	7159:000049	AAEL000077	26	1	27	27	28	0.818	Q0C782	Transmembrane:Helical
EOG0916026A	Aedes aegypti	7159:0006dc	AAEL001853	27	0	27	27	27	0.8181	Q17JY4	Mitochondrial Rho GTPase
EOG0916038R	Aedes aegypti	7159:00048f	AAEL001242	24	2	26	27	28	0.8182	Q17LU3	ribosomal pseudouridine synthase
EOG091608DK	Aedes aegypti	7159:000848	AAEL002221	23	1	24	27	25	0.8183	Q17IW0	calcium and integrin-binding protein 1
EOG091600H2	Aedes aegypti	7159:002a14	AAEL011246	24	2	26	27	28	0.8184	Q16QM7	WD-repeat protein
EOG091600H2	Aedes aegypti	7159:003375	AAEL013764	24	2	26	27	28	0.8184	Q16I80	WD-repeat protein
EOG091603WG	Aedes aegypti	7159:0011bd	AAEL004737	20	3	23	27	27	0.8184	Q17BY7	lim domain binding protein
EOG091603WG	Aedes aegypti	7159:00295f	AAEL011058	20	3	23	27	27	0.8184	Q16R65	lim domain binding protein
EOG091603WG	Aedes aegypti	7159:0030f6	AAEL013094	20	3	23	27	27	0.8184	Q16K77	lim domain binding protein
EOG091604NY	Aedes aegypti	7159:002304	AAEL009367	23	1	24	27	25	0.8184	Q16W23	Transmembrane:Helical
EOG091608WY	Aedes aegypti	7159:0003bd	AAEL001025	18	0	18	27	18	0.8184	Q17MH3	Immunoglobulin I-set
EOG09160AOM	Aedes aegypti	7159:00095f	AAEL002504	25	1	26	27	27	0.8184	Q17I03	ATP synthase delta chain, mitochondrial
EOG091601DD	Aedes aegypti	7159:000f03	AAEL004002	24	1	25	27	26	0.8185	Q17DW0	Similarity:Belongs to the GMC oxidoreductase family.
EOG091603K7	Aedes aegypti	7159:000bba	AAEL003125	23	2	25	27	27	0.8186	Q17GD3	Similarity:Belongs to the acyl-CoA dehydrogenase family.
EOG0916044Y	Aedes aegypti	7159:000f67	AAEL004110	27	0	27	27	27	0.8186	Q17DN5	cdk10/11
EOG091605XX	Aedes aegypti	7159:000f4b	AAEL004077	23	0	23	27	23	0.8186	Q17DU8	Immunoglobulin I-set
EOG091609UN	Aedes aegypti	7159:0022e8	AAEL009336	22	2	24	27	26	0.8186	Q16N24	troponin C
EOG091609UN	Aedes aegypti	7159:002d51	AAEL012114	22	2	24	27	26	0.8186	Q16N24	troponin C
EOG091608B2	Aedes aegypti	7159:003b8b	AAEL017414	18	3	21	27	25	0.8187	NA	GPCR Neurokinin/Tachykinin Family
EOG091601OJ	Aedes aegypti	7159:001887	AAEL006558	20	6	26	27	32	0.8188	Q175T3	Protein-UDP acetylgalactosaminyltransferase
EOG091601OJ	Aedes aegypti	7159:0031a5	AAEL013274	20	6	26	27	32	0.8188	Q0IE85	Protein-UDP acetylgalactosaminyltransferase
EOG09160CPA	Aedes aegypti	7159:003049	AAEL012914	14	0	14	27	14	0.8188	Q16KQ2	NA
EOG0916047Y	Aedes aegypti	7159:001b52	AAEL007311	24	1	25	27	26	0.8189	Q172Q1	CUB domain
EOG0916047Y	Aedes aegypti	7159:002621	AAEL010188	24	1	25	27	26	0.8189	Q16TM6	CUB domain
EOG09160AU9	Aedes aegypti	7159:001f4f	AAEL008367	25	0	25	27	25	0.8189	Q16Z09	Peptidyl-prolyl cis-trans isomerase
EOG09160146	Aedes aegypti	7159:002c1e	AAEL011792	21	5	26	27	31	0.819	Q16P15	Transmembrane:Helical
EOG09160146	Aedes aegypti	7159:003da5	AAEL018697	21	5	26	27	31	0.819	NA	NA
EOG091606G5	Aedes aegypti	7159:003110	AAEL013120	16	9	25	27	34	0.819	Q16K48	Cystine-knot cytokine
EOG09160B1B	Aedes aegypti	7159:003b26	AAEL017310	8	0	8	27	8	0.8191	NA	NA
EOG091604LG	Aedes aegypti	7159:001c57	AAEL007581	25	1	26	27	27	0.8192	Q171N9	Rfc5p, putative
EOG091605DS	Aedes aegypti	7159:002993	AAEL011113	25	1	26	27	27	0.8192	Q16QZ1	ApaG domain
EOG091601S8	Aedes aegypti	7159:0025f9	AAEL010146	26	1	27	27	28	0.8193	Q16TS7	Similarity:Belongs to the enoyl-CoA hydratase/isomerase family.
EOG091601S8	Aedes aegypti	7159:003952	AAEL015524	26	1	27	27	28	0.8193	Q1DGR4	Similarity:Belongs to the enoyl-CoA hydratase/isomerase family.
EOG09160467	Aedes aegypti	7159:001f68	AAEL008393	26	0	26	27	26	0.8193	Q16YY0	Transmembrane:Helical
EOG0916026W	Aedes aegypti	7159:002e78	AAEL012420	27	0	27	27	27	0.8194	Q16M53	pumilio
EOG091605AQ	Aedes aegypti	7159:000f75	AAEL004124	26	1	27	27	28	0.8194	Q17DJ4	Similarity:Belongs to the mitochondrial carrier (TC 2.A.29) family.
EOG091606FI	Aedes aegypti	7159:002557	GPRFZ7	16	5	21	27	26	0.8196	Q16U83	Transmembrane:Helical
EOG091606FI	Aedes aegypti	7159:0033ea	GPRFZ9	16	5	21	27	26	0.8196	Q16HW0	Transmembrane:Helical
EOG091608LN	Aedes aegypti	7159:000dde	AAEL003704	25	0	25	27	25	0.8196	Q17ET7	39S ribosomal protein L13, mitochondrial
EOG091606YZ	Aedes aegypti	7159:0005e6	AAEL001599	25	1	26	27	27	0.8197	Q17KQ6	Transmembrane:Helical
EOG091606YZ	Aedes aegypti	7159:003913	AAEL015437	25	1	26	27	27	0.8197	Q1DGX6	Transmembrane:Helical
EOG09160AAF	Aedes aegypti	7159:000de5	AAEL003711	23	2	25	27	27	0.8197	Q17EL5	Similarity:Contains chitin-binding type R&R domain.
EOG09160AAF	Aedes aegypti	7159:0035db	AAEL014419	23	2	25	27	27	0.8197	Q16GD5	Similarity:Contains chitin-binding type R&R domain.
EOG0916051X	Aedes aegypti	7159:00125c	AAEL004900	25	1	26	27	27	0.8198	Q17BN5	Similarity:Belongs to the FPP/GGPP synthase family.
EOG091607YN	Aedes aegypti	7159:0027ea	AAEL010658	6	21	27	27	51	0.8198	Q16S99	orf protein
EOG091607YN	Aedes aegypti	7159:00312d	AAEL013151	6	21	27	27	51	0.8198	Q16K06	orf protein
EOG09160ARW	Aedes aegypti	7159:0022ed	AAEL009341	23	0	23	27	23	0.8199	Q1HRQ0	ribosomal protein L34, putative
EOG0916007L	Aedes aegypti	7159:000fcf	AAEL004222	8	19	27	27	46	0.8202	Q17DG9	Similarity:Belongs to the calcium channel alpha-1 subunit (TC 1.A.1.11) family.
EOG0916007L	Aedes aegypti	7159:003d6c	AAEL018317	8	19	27	27	46	0.8202	NA	NA
EOG091602NX	Aedes aegypti	7159:00013b	AAEL000339	24	0	24	27	24	0.8203	Q17PE9	Similarity:Contains 4 LIM zinc-binding domains.
EOG091601Z5	Aedes aegypti	7159:001e4e	AAEL008105	26	1	27	27	28	0.8205	Q0IER7	glutamate cysteine ligase
EOG09160380	Aedes aegypti	7159:002eb8	AAEL012490	25	1	26	27	27	0.8206	Q16LX5	Transmembrane:Helical
EOG0916098S	Aedes aegypti	7159:00111a	AAEL004568	24	0	24	27	24	0.8206	Q17CK2	Similarity:Belongs to the small GTPase superfamily. Arf family.
EOG09160162	Aedes aegypti	7159:0025bd	AAEL010086	24	2	26	27	28	0.8208	Q16TZ0	Similarity:Belongs to the MCM family.
EOG09160162	Aedes aegypti	7159:00362a	AAEL014524	24	2	26	27	28	0.8208	Q16G49	Similarity:Belongs to the MCM family.
EOG0916062C	Aedes aegypti	7159:0010cc	AAEL004490	24	1	25	27	26	0.8208	Q0IFN4	Band 7, C-terminal extension
EOG091606CR	Aedes aegypti	7159:0026fd	AAEL010411	21	3	24	27	27	0.8208	Q16T14	dual specificity protein phosphatase
EOG0916038B	Aedes aegypti	7159:001546	AAEL005685	25	1	26	27	27	0.8209	Q179B2	Chitin binding domain
EOG0916038B	Aedes aegypti	7159:0030d6	AAEL013059	25	1	26	27	27	0.8209	Q16KA8	Chitin binding domain
EOG091609HZ	Aedes aegypti	7159:00160a	AAEL005891	2	25	27	27	56	0.8209	Q178H5	calmodulin
EOG091609HZ	Aedes aegypti	7159:002e1f	AAEL012326	2	25	27	27	56	0.8209	Q1HQX3	calmodulin
EOG0916010M	Aedes aegypti	7159:003cc8	AAEL018149	14	11	25	27	39	0.821	NA	NA
EOG091601WY	Aedes aegypti	7159:0017ca	AAEL006362	25	1	26	27	27	0.821	Q176G2	Similarity:Belongs to the mitochondrial carrier (TC 2.A.29) family.
EOG091605J8	Aedes aegypti	7159:00100c	AAEL004288	23	0	23	27	23	0.821	Q17D89	Serine/threonine-protein phosphatase
EOG09160394	Aedes aegypti	7159:002031	AAEL008603	25	2	27	27	29	0.8211	Q16YB1	Rab-GTPase-TBC domain
EOG091604OF	Aedes aegypti	7159:002cd8	AAEL011989	27	0	27	27	27	0.8211	Q16NF2	Transmembrane:Helical
EOG09160ARI	Aedes aegypti	7159:001cd8	AAEL007717	23	1	24	27	25	0.8211	Q0IEX8	alpha-endosulfine, putative
EOG091602W1	Aedes aegypti	7159:003322	AAEL013678	25	2	27	27	29	0.8212	Q16IH0	alpha-1,2-Mannosidase
EOG091602W1	Aedes aegypti	7159:0036e4	AAEL014721	25	2	27	27	29	0.8212	Q16FK8	alpha-1,2-Mannosidase
EOG09160851	Aedes aegypti	7159:001e4c	AAEL008103	25	0	25	27	25	0.8212	Q0IER3	40S ribosomal protein S8
EOG09160BB8	Aedes aegypti	7159:001513	AAEL005629	25	1	26	27	27	0.8213	Q1HRM8	ribosomal protein L35, putative
EOG0916044Z	Aedes aegypti	7159:002088	AAEL008696	26	1	27	27	28	0.8215	Q16Y16	SMAD family member
EOG09160AVM	Aedes aegypti	7159:0003db	AAEL001055	21	1	22	27	23	0.8215	Q17MC7	NA
EOG09160AVM	Aedes aegypti	7159:000b8a	AAEL003074	21	1	22	27	23	0.8215	Q0IGA1	NA
EOG0916021R	Aedes aegypti	7159:002285	AAEL009232	24	1	25	27	26	0.8217	Q16WF9	Transmembrane:Helical
EOG091603UI	Aedes aegypti	7159:0037a6	AAEL014949	26	0	26	27	26	0.8217	Q16F04	AB-hydrolase ABHD1/2/3
EOG09160800	Aedes aegypti	7159:002868	AAEL010789	20	3	23	27	26	0.8217	Q16RX5	EF-Hand 1, calcium-binding site
EOG09160800	Aedes aegypti	7159:00286b	AAEL010792	20	3	23	27	26	0.8217	Q16RX4	EF-Hand 1, calcium-binding site
EOG0916004Q	Aedes aegypti	7159:0023d5	AAEL009583	6	20	26	27	47	0.8218	Q16VF7	filamin, putative
EOG09160A8V	Aedes aegypti	7159:000083	AAEL000138	20	3	23	27	26	0.8218	Q17Q29	NADH dehydrogenase, putative
EOG09160A8V	Aedes aegypti	7159:0030c6	AAEL013043	20	3	23	27	26	0.8218	Q16KC4	NADH dehydrogenase, putative
EOG091601WE	Aedes aegypti	7159:00193a	AAEL006740	27	0	27	27	27	0.8219	Q174X7	NA
EOG0916066G	Aedes aegypti	7159:0020c4	Fsn	26	0	26	27	26	0.8219	Q16XV7	F-box/SPRY domain-containing protein 1
EOG09160EZJ	Aedes aegypti	7159:0034ae	AAEL014102	4	0	4	27	4	0.8219	Q16H95	Immunoglobulin-like domain
EOG09160BWK	Aedes aegypti	7159:001562	AAEL005713	17	0	17	27	17	0.822	Q0IFD3	Cyclin-dependent kinase 2-associated protein
EOG091601IM	Aedes aegypti	7159:0027b4	AAEL010602	26	1	27	27	28	0.8221	Q16SE5	Active Site:Nucleophile
EOG091601IM	Aedes aegypti	7159:002bb8	AAEL011686	26	1	27	27	28	0.8221	Q16PC7	Active Site:Nucleophile
EOG0916013Q	Aedes aegypti	7159:00343c	AAEL013985	27	0	27	27	27	0.8222	Q16HL1	Similarity:Belongs to the DEAD box helicase family.
EOG09160346	Aedes aegypti	7159:002513	AAEL009913	24	2	26	27	28	0.8223	Q16UG1	DEAD box ATP-dependent RNA helicase
EOG09160346	Aedes aegypti	7159:002cf0	AAEL012015	24	2	26	27	28	0.8223	Q16NC6	DEAD box ATP-dependent RNA helicase
EOG09160BQP	Aedes aegypti	7159:000ef2	AAEL003985	19	1	20	27	21	0.8225	Q17E06	small nuclear ribonucleoprotein, core, putative
EOG091603TA	Aedes aegypti	7159:001b8e	AAEL007375	24	2	26	27	28	0.8226	Q172H9	pyruvate dehydrogenase
EOG091607JA	Aedes aegypti	7159:002ae5	AAEL011462	26	0	26	27	26	0.8226	Q16Q16	Transcription initiation factor IIE subunit beta
EOG09160AK4	Aedes aegypti	7159:000527	AAEL001400	8	0	8	27	8	0.8226	Q17L91	DNA-directed RNA polymerase subunit
EOG09160BHN	Aedes aegypti	7159:000050	AAEL000084	24	0	24	27	24	0.8226	Q0C7C3	elongin b
EOG0916021L	Aedes aegypti	7159:00342a	AAEL013967	24	2	26	27	28	0.8227	Q16HN6	Methylmalonyl-CoA carboxyltransferase 12S subunit, putative
EOG0916036Z	Aedes aegypti	7159:000f79	AAEL004128	24	2	26	27	28	0.8227	Q17DJ1	WD40 repeat
EOG091607BA	Aedes aegypti	7159:00155e	AAEL005709	25	1	26	27	27	0.8227	Q178Z8	n-acetyltransferase separation anxiety
EOG091602TD	Aedes aegypti	7159:000375	AAEL000947	11	16	27	27	44	0.8229	Q1HRQ4	Transmembrane:Helical
EOG091602TD	Aedes aegypti	7159:002385	AAEL009501	11	16	27	27	44	0.8229	Q0IEM7	Similarity:Belongs to the enoyl-CoA hydratase/isomerase family.
EOG091606LJ	Aedes aegypti	7159:000096	AAEL000159	23	3	26	27	29	0.8229	Q17Q08	nipsnap
EOG091606HM	Aedes aegypti	7159:000a09	AAEL002678	26	1	27	27	28	0.823	Q17HI9	ras suppressor protein 1, rsu1
EOG091602NN	Aedes aegypti	7159:001ac0	AAEL007153	27	0	27	27	27	0.8231	Q173G6	Catalytic Activity:ATP + a protein = ADP + a phosphoprotein.
EOG09160538	Aedes aegypti	7159:002aa3	AAEL011394	23	1	24	27	25	0.8231	Q16Q50	MEMO1 family
EOG09160538	Aedes aegypti	7159:003562	AAEL014294	23	1	24	27	25	0.8231	Q16GR2	MEMO1 family
EOG091601GF	Aedes aegypti	7159:0012fa	AAEL005061	26	0	26	27	26	0.8232	Q17B75	sec10
EOG0916037W	Aedes aegypti	7159:0021c5	AAEL009029	27	0	27	27	27	0.8232	Q16X08	Similarity:Belongs to the aldehyde dehydrogenase family.
EOG09160567	Aedes aegypti	7159:00190b	AAEL006693	26	1	27	27	28	0.8232	Q175D4	uroporphyrinogen decarboxylase
EOG09160B1D	Aedes aegypti	7159:00057a	AAEL001490	22	1	23	27	24	0.8232	Q17L30	Similarity:Belongs to the acylphosphatase family.
EOG091601RC	Aedes aegypti	7159:000e76	AAEL003860	26	0	26	27	26	0.8233	Q17EB9	Transporter
EOG091603RU	Aedes aegypti	7159:003581	AAEL014325	25	0	25	27	25	0.8233	Q1HQM8	Similarity:Contains PCI domain.
EOG09160448	Aedes aegypti	7159:000252	AAEL000641	25	1	26	27	27	0.8233	Q1HR78	Protein disulfide-isomerase
EOG09160355	Aedes aegypti	7159:001406	AAEL005343	24	2	26	27	28	0.8234	Q17AA2	Dystrobrevin
EOG091601Y7	Aedes aegypti	7159:0001dc	AAEL000511;ace-1	26	0	26	27	26	0.8236	Q17P31	Carboxylic ester hydrolase
EOG091603DZ	Aedes aegypti	7159:001ecf	AAEL008234	26	0	26	27	26	0.8236	Q16ZD5	Similarity:Contains 1 PDZ (DHR) domain.
EOG091603N3	Aedes aegypti	7159:0006bb	AAEL001818	23	0	23	27	23	0.8236	Q17K38	Similarity:Contains 7 ANK repeats.
EOG091606SR	Aedes aegypti	7159:0022dc	AAEL009324	24	2	26	27	28	0.8236	Q16W58	Similarity:Belongs to the short-chain dehydrogenases/reductases (SDR) family.
EOG091606SR	Aedes aegypti	7159:0022e0	AAEL009328	24	2	26	27	28	0.8236	Q16W60	Similarity:Belongs to the short-chain dehydrogenases/reductases (SDR) family.
EOG091601RT	Aedes aegypti	7159:001962	AAEL006780	24	3	27	27	32	0.8237	Q174U5	Palmitoyltransferase
EOG091605YP	Aedes aegypti	7159:001ee6	AAEL008257	24	3	27	27	30	0.8237	Q1HR40	heterogeneous nuclear ribonucleoprotein 27c
EOG091604VU	Aedes aegypti	7159:003126	AAEL013144	23	2	25	27	27	0.8238	Q16K15	Eukaryotic translation initiation factor 3 subunit I
EOG091604VU	Aedes aegypti	7159:003963	AAEL015547	23	2	25	27	27	0.8238	Q1DGP5	WD40 repeat
EOG0916080A	Aedes aegypti	7159:002743	AAEL010487	18	1	19	27	20	0.8238	Q16SU9	Transmembrane:Helical
EOG0916080A	Aedes aegypti	7159:003730	AAEL014819	18	1	19	27	20	0.8238	Q16FD7	Transmembrane:Helical
EOG091601J0	Aedes aegypti	7159:0034e1	AAEL014162	18	8	26	27	35	0.8239	Q16H44	Transmembrane:Helical
EOG091601XQ	Aedes aegypti	7159:002abd	AAEL011420	24	2	26	27	28	0.8239	Q0IEC2	Nucleotide-binding alpha-beta plait domain
EOG091608DJ	Aedes aegypti	7159:001c37	AAEL007549	23	3	26	27	29	0.8239	Q1HQT8	phosphatidylethanolamine-binding protein
EOG091608DJ	Aedes aegypti	7159:002f5c	AAEL012666	23	3	26	27	29	0.8239	Q16LF6	phosphatidylethanolamine-binding protein
EOG091603VU	Aedes aegypti	7159:001449	AAEL005415	17	1	18	27	19	0.8241	Q17A56	Ferrochelatase
EOG09160CME	Aedes aegypti	7159:000820	AAEL002181	3	16	19	27	43	0.8241	Q17IZ3	cuticle protein, putative
EOG09160CME	Aedes aegypti	7159:003b7f	AAEL017402	3	16	19	27	43	0.8241	NA	NA
EOG091605TP	Aedes aegypti	7159:0021ed	AAEL009072	26	0	26	27	26	0.8242	Q16WX1	ribonucleoprotein
EOG09160599	Aedes aegypti	7159:000f78	AAEL004127	17	3	20	27	23	0.8243	Q17DJ9	Similarity:Belongs to the acyl-CoA dehydrogenase family.
EOG09160599	Aedes aegypti	7159:000f82	AAEL004137	17	3	20	27	23	0.8243	Q17DJ8	Similarity:Belongs to the acyl-CoA dehydrogenase family.
EOG09160BD6	Aedes aegypti	7159:000c27	AAEL003240	18	1	19	27	20	0.8243	Q17G04	NA
EOG09160BD6	Aedes aegypti	7159:00277b	AAEL010545	18	1	19	27	20	0.8243	Q16SN1	NA
EOG091601PS	Aedes aegypti	7159:002365	AAEL009469	27	0	27	27	27	0.8245	Q16VQ0	cell division control protein
EOG091601BU	Aedes aegypti	7159:00179d	AAEL006315	24	2	26	27	28	0.8246	Q176M6	26S proteasome regulatory subunit rpn1
EOG0916058W	Aedes aegypti	7159:000fae	AAEL004185	26	1	27	27	28	0.8246	Q0IFT6	Calcineurin-like phosphoesterase
EOG0916058W	Aedes aegypti	7159:0029cc	AAEL011172	26	1	27	27	28	0.8246	Q16QU4	Calcineurin-like phosphoesterase
EOG091606VC	Aedes aegypti	7159:00120f	MNSOD1	24	0	24	27	24	0.8247	Q17BT9	Superoxide dismutase
EOG091600BJ	Aedes aegypti	7159:0027c1	AAEL010617	23	3	26	27	29	0.8249	Q16SE0	DNA-directed RNA polymerase
EOG091600BJ	Aedes aegypti	7159:002bbe	AAEL011692	23	3	26	27	29	0.8249	Q16PD2	DNA-directed RNA polymerase
EOG0916065R	Aedes aegypti	7159:002154	AAEL008912	26	0	26	27	26	0.8249	Q16XD7	Transmembrane:Helical
EOG091608JD	Aedes aegypti	7159:0007c1	AAEL002086	17	10	27	27	41	0.8249	Q16YU7	ER lumen protein-retaining receptor
EOG091608JD	Aedes aegypti	7159:00162d	AAEL005926	17	10	27	27	41	0.8249	Q178F0	Transmembrane:Helical
EOG091608JD	Aedes aegypti	7159:001f8e	AAEL008434	17	10	27	27	41	0.8249	Q16YU7	ER lumen protein-retaining receptor
EOG091600R8	Aedes aegypti	7159:000e57	AAEL003829	27	0	27	27	27	0.8251	Q17EC7	Similarity:Contains dynamin-type G (guanine nucleotide-binding) domain.
EOG0916036C	Aedes aegypti	7159:00175a	AAEL006240	25	0	25	27	25	0.8251	Q176W6	Purple acid phosphatase
EOG09160HC9	Aedes aegypti	7159:003a88	AAEL017145	2	0	2	27	2	0.8251	NA	NA
EOG091600WB	Aedes aegypti	7159:003693	AAEL014632	23	4	27	27	32	0.8252	Q16FU5	Similarity:Belongs to the group II decarboxylase family.
EOG091603CT	Aedes aegypti	7159:000812	GPRgr2	26	0	26	27	26	0.8252	Q17J22	Transmembrane:Helical
EOG091604LB	Aedes aegypti	7159:000e2b	AAEL003784	25	1	26	27	27	0.8252	Q17EI7	Chitin-binding, domain 3
EOG091604LB	Aedes aegypti	7159:0013ce	AAEL005283	25	1	26	27	27	0.8252	Q17AL8	Chitin-binding, domain 3
EOG09160BR2	Aedes aegypti	7159:0018dd	AAEL006645	8	1	9	27	10	0.8252	Q175I6	Nucleotide-binding alpha-beta plait domain
EOG0916012I	Aedes aegypti	7159:002680	AAEL010286	26	0	26	27	26	0.8253	Q16TC8	Transmembrane:Helical
EOG091601SP	Aedes aegypti	7159:0031b9	AAEL013294	26	0	26	27	26	0.8253	Q16JL4	Tetratricopeptide repeat protein 30 homolog
EOG091608AH	Aedes aegypti	7159:0007ba	AAEL002079	25	0	25	27	25	0.8253	Q17JE5	TATA binding protein, putative
EOG091602YB	Aedes aegypti	7159:003d90	AAEL018354	26	0	26	27	26	0.8254	NA	oxysterol-binding protein
EOG09160A4G	Aedes aegypti	7159:00095b	AAEL002500	19	0	19	27	19	0.8254	Q17HY7	Periplasmic binding protein-like I
EOG091605AU	Aedes aegypti	7159:002325	AAEL009402	24	1	25	27	26	0.8255	Q16VX5	map kinase-activated protein kinase (mapkapk)
EOG0916013H	Aedes aegypti	7159:0031a6	AAEL013275	27	0	27	27	27	0.8257	Q0IE87	importin beta-1
EOG091607TW	Aedes aegypti	7159:000887	MED18	27	0	27	27	27	0.8257	Q17IN5	Mediator complex subunit 18
EOG09160CCE	Aedes aegypti	7159:0019bc	AAEL006878	11	0	11	27	11	0.8258	Q174J8	RGS domain
EOG091607Y0	Aedes aegypti	7159:003121	AAEL013139	25	0	25	27	25	0.8259	Q16K17	Similarity:Belongs to the small GTPase superfamily. Rho family.
EOG091609AF	Aedes aegypti	7159:000e82	Tctp	25	0	25	27	25	0.8259	Q1HR79	Translationally-controlled tumor protein homolog
EOG09160C6Z	Aedes aegypti	7159:00017a	AAEL000407	11	0	11	27	11	0.826	Q17P87	Protein kish
EOG09160AHQ	Aedes aegypti	7159:00023f	AAEL000619	18	1	19	27	32	0.8261	Q17NR6	Transmembrane:Helical
EOG09160AHQ	Aedes aegypti	7159:0002b1	AAEL000740	18	1	19	27	32	0.8261	Q17NE4	Mitochondrial F1-F0 ATP synthase subunit F, predicted
EOG09160AHQ	Aedes aegypti	7159:000330	AAEL000877	18	1	19	27	32	0.8261	Q17MZ9	Transmembrane:Helical
EOG09160AHQ	Aedes aegypti	7159:00065d	AAEL001718	18	1	19	27	32	0.8261	Q17KD8	Transmembrane:Helical
EOG09160AHQ	Aedes aegypti	7159:000adc	AAEL002897	18	1	19	27	32	0.8261	Q17GS1	Transmembrane:Helical
EOG09160AHQ	Aedes aegypti	7159:00117c	AAEL004670	18	1	19	27	32	0.8261	Q17C84	Mitochondrial F1-F0 ATP synthase subunit F, predicted
EOG09160AHQ	Aedes aegypti	7159:00150a	AAEL005620	18	1	19	27	32	0.8261	Q179H1	Transmembrane:Helical
EOG09160AHQ	Aedes aegypti	7159:002847	AAEL010754	18	1	19	27	32	0.8261	Q0IEG4	Transmembrane:Helical
EOG09160AHQ	Aedes aegypti	7159:002935	AAEL011010	18	1	19	27	32	0.8261	Q16RB7	Transmembrane:Helical
EOG09160AHQ	Aedes aegypti	7159:002990	AAEL011110	18	1	19	27	32	0.8261	Q16R28	Transmembrane:Helical
EOG09160AHQ	Aedes aegypti	7159:002acc	AAEL011437	18	1	19	27	32	0.8261	Q16Q26	Transmembrane:Helical
EOG09160AHQ	Aedes aegypti	7159:002e98	AAEL012454	18	1	19	27	32	0.8261	Q16M16	Mitochondrial F1-F0 ATP synthase subunit F, predicted
EOG09160AHQ	Aedes aegypti	7159:003632	AAEL014532	18	1	19	27	32	0.8261	Q16G41	Transmembrane:Helical
EOG09160AHQ	Aedes aegypti	7159:0036be	AAEL014681	18	1	19	27	32	0.8261	Q16FP9	Transmembrane:Helical
EOG09160CEF	Aedes aegypti	7159:003756	AAEL014857	16	0	16	27	16	0.8261	Q16F92	NA
EOG091603B8	Aedes aegypti	7159:003cab	AAEL018120	24	1	25	27	26	0.8262	NA	NA
EOG09160APH	Aedes aegypti	7159:002beb	AAEL011739	24	1	25	27	26	0.8262	Q16P76	MAFF protein, putative
EOG091600H6	Aedes aegypti	7159:000aae	AAEL002851	6	21	27	27	61	0.8263	Q17GX9	Function:Tubulin is the major constituent of microtubules. It binds two moles of GTP, one at an exchangeable site on the beta chain and one at a non-exchangeable site on the alpha chain.
EOG091600H6	Aedes aegypti	7159:003cad	AAEL018122	6	21	27	27	61	0.8263	NA	NA
EOG091600B9	Aedes aegypti	7159:002d32	AAEL012083	26	0	26	27	26	0.8264	Q16N57	Transmembrane:Helical
EOG091600K2	Aedes aegypti	7159:001286	AAEL004942	26	0	26	27	26	0.8264	Q17BI8	helicase
EOG091607FO	Aedes aegypti	7159:00222c	GPRMGL3_1	15	1	16	27	17	0.8265	Q16WP7	Transmembrane:Helical
EOG091607FO	Aedes aegypti	7159:0038f6	GPRMGL3_2	15	1	16	27	17	0.8265	Q1DGZ8	Transmembrane:Helical
EOG091607PE	Aedes aegypti	7159:001ad9	AAEL007185	17	0	17	27	17	0.8265	Q173E2	Longin-like domain
EOG09160BTV	Aedes aegypti	7159:003bcc	AAEL017481	21	0	21	27	21	0.8265	NA	NA
EOG091604MH	Aedes aegypti	7159:00267e	AAEL010284	20	4	24	27	29	0.8266	Q16TC0	aliphatic nitrilase, putative
EOG0916063K	Aedes aegypti	7159:001aae	AAEL007135	23	1	24	27	25	0.8266	Q173J1	peroxiredoxin 5, prdx5
EOG0916004U	Aedes aegypti	7159:000d16	AAEL003498	24	3	27	27	30	0.8267	Q17F85	Transmembrane:Helical
EOG091601RP	Aedes aegypti	7159:000f04	AAEL004003	21	0	21	27	21	0.8267	Q17DV9	Similarity:Belongs to the GMC oxidoreductase family.
EOG0916041V	Aedes aegypti	7159:0027ed	AAEL010661	24	0	24	27	24	0.8267	Q16S90	phospholipid scramblase 1,
EOG0916004H	Aedes aegypti	7159:001529	AAEL005656	24	3	27	27	31	0.8268	Q179E8	Similarity:Contains IQ domain.
EOG0916004H	Aedes aegypti	7159:001576	AAEL005733	24	3	27	27	31	0.8268	Q178Y3	Similarity:Contains IQ domain.
EOG0916034D	Aedes aegypti	7159:0024b5	AAEL009816	20	3	23	27	27	0.8268	Q16UQ5	NA
EOG0916034D	Aedes aegypti	7159:003077	AAEL012961	20	3	23	27	27	0.8268	Q16KJ7	vacuolar protein sorting 26, vps26
EOG0916034D	Aedes aegypti	7159:00357f	AAEL014323	20	3	23	27	27	0.8268	Q16GN2	vacuolar protein sorting 26, vps26
EOG091601RI	Aedes aegypti	7159:000c8a	AAEL003349	26	1	27	27	28	0.8269	Q17FM7	NADPH--cytochrome P450 reductase
EOG091601RI	Aedes aegypti	7159:0036c4	AAEL014689	26	1	27	27	28	0.8269	Q16FP0	NADPH cytochrome P450
EOG091605HM	Aedes aegypti	7159:001bfc	AAEL007487	24	0	24	27	24	0.8269	Q171X7	Pseudouridine synthase, catalytic domain
EOG091604NI	Aedes aegypti	7159:00263c	AAEL010216	10	17	27	27	44	0.8271	Q16TJ9	Similarity:Contains cyclic nucleotide-binding domain.
EOG091605N4	Aedes aegypti	7159:001cce	AAEL007707	22	1	23	27	24	0.8271	Q171B2	Malate dehydrogenase
EOG091609IA	Aedes aegypti	7159:001cd6	AAEL007715	25	0	25	27	25	0.8271	Q1HRN4	60S ribosomal protein L21
EOG09160CIM	Aedes aegypti	7159:000494	AAEL001247	10	13	23	27	36	0.8271	Q1HR37	At2g23090-like
EOG09160CIM	Aedes aegypti	7159:0004a4	AAEL001264	10	13	23	27	36	0.8271	Q17LS3	At2g23090-like
EOG091602JC	Aedes aegypti	7159:000f07	AAEL004006	26	0	26	27	26	0.8272	Q17DY3	Similarity:Belongs to the ligand-gated ion channel (TC 1.A.9) family.
EOG091605AZ	Aedes aegypti	7159:0016af	AAEL006063	24	0	24	27	24	0.8272	Q177M8	U3 small nucleolar ribonucleoprotein protein imp4
EOG091605SY	Aedes aegypti	7159:0036fa	AAEL014743	26	0	26	27	26	0.8272	Q16FI8	Similarity:Contains 1 LIM zinc-binding domain.
EOG091604AW	Aedes aegypti	7159:00159e	SGPRor7	26	1	27	27	32	0.8273	Q178U6	Gustatory and odorant receptor 7
EOG091604LD	Aedes aegypti	7159:003446	AAEL013995	26	0	26	27	26	0.8273	Q16HK2	autophagy related gene
EOG091604RR	Aedes aegypti	7159:003c09	AAEL017543	24	0	24	27	24	0.8273	NA	NA
EOG091606RX	Aedes aegypti	7159:0029b6	AAEL011150	26	1	27	27	28	0.8273	Q16QW9	RNA-binding protein precursor, putative
EOG0916017T	Aedes aegypti	7159:002eeb	AAEL012546	27	0	27	27	27	0.8274	Q16LS4	DNA helicase
EOG09160BU0	Aedes aegypti	7159:000a29	AAEL002710	16	3	19	27	22	0.8274	Q17HF4	C2 domain
EOG091607HB	Aedes aegypti	7159:001502	AAEL005610	21	0	21	27	21	0.8275	Q179J9	mitochondrial ATP synthase b chain
EOG091608EJ	Aedes aegypti	7159:00160d	AAEL005894	10	0	10	27	10	0.8276	Q178H6	Transmembrane:Helical
EOG09160BP9	Aedes aegypti	7159:002136	AAEL008880	11	3	14	27	17	0.8277	Q16XG7	cytochrome c oxidase,-subunit VIb, putative
EOG09160BP9	Aedes aegypti	7159:00213d	AAEL008887	11	3	14	27	17	0.8277	Q16XG8	cytochrome c oxidase,-subunit VIb
EOG09160H0L	Aedes aegypti	7159:003b52	AAEL017356	1	1	2	27	3	0.8279	NA	NA
EOG091601RE	Aedes aegypti	7159:001386	AAEL005207	25	1	26	27	27	0.828	Q17AS1	Transmembrane:Helical
EOG091602NY	Aedes aegypti	7159:000cf3	AAEL003462	2	25	27	27	53	0.828	Q17FA2	Similarity:Belongs to the group II decarboxylase family.
EOG091602NY	Aedes aegypti	7159:003d5e	AAEL018302	2	25	27	27	53	0.828	NA	NA
EOG091603O2	Aedes aegypti	7159:0035f8	AAEL014452	22	2	24	27	26	0.828	Q16GA1	Similarity:Belongs to the acyl-CoA dehydrogenase family.
EOG091605RZ	Aedes aegypti	7159:0032db	AAEL013589	8	0	8	27	8	0.828	Q16IP8	Similarity:Contains Sema domain.
EOG091604HB	Aedes aegypti	7159:000656	AAEL001711	24	1	25	27	26	0.8281	Q17KD7	Serine/threonine-protein kinase receptor
EOG091606B0	Aedes aegypti	7159:002594	AAEL010045	24	0	24	27	24	0.8281	Q16U25	Protein FAM50 homolog
EOG091604G1	Aedes aegypti	7159:002ad0	AAEL011441	26	0	26	27	26	0.8283	Q16Q29	Similarity:Contains protein kinase domain.
EOG091606W3	Aedes aegypti	7159:002c42	AAEL011830	24	0	24	27	24	0.8283	Q16NX0	Probable methylthioribulose-1-phosphate dehydratase
EOG09160051	Aedes aegypti	7159:001684	AAEL006019	22	3	25	27	28	0.8284	Q177V1	Sodium channel protein
EOG091609MW	Aedes aegypti	7159:0016e1	AAEL006114	24	0	24	27	24	0.8285	Q177J5	gata-binding factor-c (transcription factor gata-c)
EOG091601CP	Aedes aegypti	7159:0033f8	AAEL013900	5	1	6	27	7	0.8286	Q16HU8	cAMP and cAMP-inhibited cgmp 3,5-cyclic phosphodiesterase
EOG091600U8	Aedes aegypti	7159:002c35	AAEL011817	27	0	27	27	27	0.8287	Q16NZ5	nonsense-mediated mRNA decay protein 1 (rent1)
EOG091607LU	Aedes aegypti	7159:0009e0	AAEL002637	23	1	24	27	25	0.8287	Q17HK1	Similarity:Contains RING-type zinc finger.
EOG091601IX	Aedes aegypti	7159:000dfe	AAEL003736	26	1	27	27	28	0.8288	Q17EP0	sec15
EOG091604HK	Aedes aegypti	7159:0033c3	AAEL013845	26	0	26	27	26	0.8288	Q16I00	endoplasmic reticulum resident protein (ERp44), putative
EOG09160594	Aedes aegypti	7159:000f8b	AAEL004148	26	0	26	27	26	0.8289	Q17DL1	heat shock protein 70 (hsp70)-interacting protein
EOG09160ADG	Aedes aegypti	7159:00185a	AAEL006509	20	0	20	27	20	0.8289	Q1HR38	ATPase, F0 complex, subunit G, mitochondrial
EOG0916003G	Aedes aegypti	7159:000abf	AAEL002868	23	4	27	27	32	0.829	Q17GW3	Similarity:Contains myosin motor domain.
EOG091606EB	Aedes aegypti	7159:002041	AAEL008621	8	19	27	27	47	0.8291	Q16Y81	cdk1
EOG091606EB	Aedes aegypti	7159:002e29	AAEL012339	8	19	27	27	47	0.8291	Q16JH7	cdk1
EOG091606EB	Aedes aegypti	7159:0031d9	AAEL013329	8	19	27	27	47	0.8291	Q16JH7	cdk1
EOG091607ZC	Aedes aegypti	7159:00079a	AAEL002047	20	3	23	27	26	0.8291	Q1HR41	40S ribosomal protein S10
EOG091605CH	Aedes aegypti	7159:00240d	AAEL009641	25	0	25	27	25	0.8294	Q16V88	ladybird homeobox corepressor
EOG09160AZR	Aedes aegypti	7159:0031db	AAEL013331	18	1	19	27	20	0.8294	Q16JH6	NA
EOG09160AZR	Aedes aegypti	7159:003675	AAEL014602	18	1	19	27	20	0.8294	Q16FX6	NA
EOG091604KD	Aedes aegypti	7159:002a13	AAEL011245	18	3	21	27	24	0.8295	Q16QM1	deoxyhypusine synthase
EOG091609AO	Aedes aegypti	7159:001cba	AAEL007685	22	0	22	27	22	0.8295	Q171D0	Zinc finger, CCCH-type
EOG09160AHU	Aedes aegypti	7159:001b69	AAEL007334	22	1	23	27	24	0.8295	Q16I76	Similarity:Contains ADF-H domain.
EOG09160AHU	Aedes aegypti	7159:003379	AAEL013768	22	1	23	27	24	0.8295	Q16I76	Similarity:Contains ADF-H domain.
EOG091601UF	Aedes aegypti	7159:0009e8	AAEL002645	25	2	27	27	29	0.8296	Q17HK7	alpha-1,2-Mannosidase
EOG091605KB	Aedes aegypti	7159:00018d	AAEL000428	26	1	27	27	29	0.8296	Q17P71	Tryptamin 2,3-dioxygenase
EOG09160BAM	Aedes aegypti	7159:0035da	AAEL014418	24	0	24	27	24	0.8296	Q16GD3	Similarity:Contains chitin-binding type R&R domain.
EOG091607A2	Aedes aegypti	7159:0015d2	AAEL005829	22	2	24	27	27	0.8297	Q178N2	Core binding factor, beta subunit
EOG0916065T	Aedes aegypti	7159:0006ef	AAEL001872	20	0	20	27	20	0.8298	Q1HR57	voltage-dependent anion-selective channel
EOG091608D3	Aedes aegypti	7159:000f69	AAEL004112	24	1	25	27	26	0.8299	Q17DN4	Thioredoxin Peroxidase.
EOG091601WM	Aedes aegypti	7159:001411	AAEL005356	26	1	27	27	30	0.83	Q17AA5	poly a polymerase
EOG091606LZ	Aedes aegypti	7159:0023d1	AAEL009577	7	0	7	27	7	0.83	Q16VF4	Chitin binding domain
EOG091601FS	Aedes aegypti	7159:0000a3	eIF3-S8	25	1	26	27	27	0.8301	Q17Q06	Eukaryotic translation initiation factor 3 subunit 8
EOG091605YC	Aedes aegypti	7159:000649	AAEL001698	22	2	24	27	26	0.8301	Q17KG9	charged multivesicular body protein 4b
EOG091603S9	Aedes aegypti	7159:001528	AAEL005655	27	0	27	27	27	0.8302	Q179E9	sorting nexin
EOG09160AIE	Aedes aegypti	7159:000901	AAEL002410	17	1	18	27	19	0.8302	Q17IB5	Immunoglobulin-like domain
EOG091602WR	Aedes aegypti	7159:000547	AAEL001432	24	1	25	27	26	0.8303	Q17L92	Protein disulfide-isomerase
EOG091605Z9	Aedes aegypti	7159:003691	AAEL014630	23	0	23	27	23	0.8303	Q16FU7	cytochrome C1 heme lyase
EOG0916003Q	Aedes aegypti	7159:000517	AAEL001384	23	4	27	27	31	0.8304	Q17LE3	triple functional domain, trio
EOG091602DH	Aedes aegypti	7159:001060	AAEL004379	23	1	24	27	25	0.8304	Q17CZ9	phosphatidylinositol 4-kinase type-ii
EOG091600UY	Aedes aegypti	7159:0021e8	AAEL009067	26	1	27	27	28	0.8305	Q16WX8	helicase
EOG09160354	Aedes aegypti	7159:0010c7	NHE8	26	1	27	27	28	0.8305	Q4L225	Sodium/hydrogen exchanger
EOG091606R5	Aedes aegypti	7159:0018c9	AAEL006625	26	0	26	27	26	0.8305	Q175L0	Ribosome maturation protein SBDS, conserved site
EOG091607PG	Aedes aegypti	7159:002753	AAEL010505	25	1	26	27	27	0.8305	Q16SS1	Ribulose-phosphate 3-epimerase
EOG091607PR	Aedes aegypti	7159:00156b	AAEL005722	25	2	27	27	29	0.8305	Q0IFE0	60S ribosomal protein L7a
EOG091600SX	Aedes aegypti	7159:000478	AAEL001218	26	0	26	27	26	0.8306	Q17LY0	alanyl-tRNA synthetase
EOG09160AUU	Aedes aegypti	7159:000d18	AAEL003500	19	0	19	27	19	0.8306	Q17F84	Immunoglobulin-like fold
EOG0916079C	Aedes aegypti	7159:003c61	AAEL018038	17	0	17	27	17	0.8307	NA	NA
EOG091609QE	Aedes aegypti	7159:00008b	AAEL000147	21	0	21	27	21	0.8307	Q17Q33	single-stranded DNA binding protein, putative
EOG09160C7R	Aedes aegypti	7159:000778	AAEL002011	12	0	12	27	12	0.8307	Q17JL8	Insect odorant-binding protein A10/Ejaculatory bulb-specific protein 3
EOG091605QK	Aedes aegypti	7159:002206	AAEL009100	22	3	25	27	28	0.8308	Q16WT9	Similarity:Belongs to the mitochondrial carrier (TC 2.A.29) family.
EOG091605QK	Aedes aegypti	7159:00393a	AAEL015484	22	3	25	27	28	0.8308	Q1DGT8	Similarity:Belongs to the mitochondrial carrier (TC 2.A.29) family.
EOG09160A71	Aedes aegypti	7159:001023	AAEL004311	23	0	23	27	23	0.8308	Q17D62	Predicted coiled-coil protein (DUF2205)
EOG0916001Q	Aedes aegypti	7159:00263b	AAEL010215	23	3	26	27	29	0.8309	Q16TK0	filamin, putative
EOG0916001Q	Aedes aegypti	7159:00366a	AAEL014591	23	3	26	27	29	0.8309	Q16FY6	filamin, putative
EOG091606WI	Aedes aegypti	7159:000e81	AAEL003871	25	1	26	27	27	0.8309	Q17EA3	Proteasome subunit alpha type
EOG091600IL	Aedes aegypti	7159:0014fd	AAEL005605	26	1	27	27	28	0.831	Q179J5	adenylsulphate kinase
EOG091609HJ	Aedes aegypti	7159:002cce	AAEL011979	25	0	25	27	25	0.831	Q16NH0	calmodulin
EOG09160AXP	Aedes aegypti	7159:003294	AAEL013518	20	0	20	27	20	0.831	Q16IX1	Similarity:Belongs to the nuclear hormone receptor family.
EOG0916089N	Aedes aegypti	7159:003259	AAEL013459	21	0	21	27	21	0.8311	Q16J28	Leucine-rich repeat
EOG0916091I	Aedes aegypti	7159:0022e9	AAEL009337	18	0	18	27	18	0.8311	Q16W51	Similarity:Belongs to the adenylate kinase family.
EOG0916084R	Aedes aegypti	7159:0013ba	AAEL005261	27	0	27	27	27	0.8312	Q17AJ8	Vacuolar import/degradation protein Vid24
EOG09160AJ3	Aedes aegypti	7159:0020ca	AAEL008764	19	0	19	27	19	0.8312	Q16XV0	Similarity:Contains chitin-binding type R&R domain.
EOG09160AOZ	Aedes aegypti	7159:000fda	AAEL004234	26	0	26	27	26	0.8312	Q17DE6	Transmembrane:Helical
EOG09160CMS	Aedes aegypti	7159:00359f	AAEL014357	5	0	5	27	5	0.8313	Q16GJ5	Sushi/SCR/CCP domain
EOG09160BQR	Aedes aegypti	7159:003061	AAEL012939	24	1	25	27	26	0.8314	Q16KM4	gamma-subunit,methylmalonyl-CoA decarboxylase, putative
EOG09160BQR	Aedes aegypti	7159:0038eb	AAEL015379	24	1	25	27	26	0.8314	Q1DH05	CHCH
EOG091601KC	Aedes aegypti	7159:0004eb	AAEL001339	27	0	27	27	27	0.8316	Q17LJ8	RNA polymerase II associated factor Paf1
EOG091602JM	Aedes aegypti	7159:0020ff	AAEL008823	16	2	18	27	20	0.8316	Q16XQ9	Catalytic Activity:ATP + a protein = ADP + a phosphoprotein.
EOG091606FB	Aedes aegypti	7159:0029a9	AAEL011135	26	0	26	27	26	0.8316	Q16QZ2	GPN-loop GTPase
EOG091608G4	Aedes aegypti	7159:000f62	AAEL004105	25	1	26	27	27	0.8316	Q17DQ3	Similarity:Belongs to the globin family.
EOG091602BK	Aedes aegypti	7159:000d61	AAEL003575	17	3	20	27	23	0.8317	Q17F56	Transmembrane:Helical
EOG091603LP	Aedes aegypti	7159:003d35	AAEL018261	26	0	26	27	26	0.8317	NA	NA
EOG0916063C	Aedes aegypti	7159:00176e	AAEL006261	22	4	26	27	30	0.8317	Q176V6	Transmembrane:Helical
EOG09160277	Aedes aegypti	7159:002d52	AAEL012115	23	3	26	27	29	0.8318	Q16HD1	vacuolar protein sorting
EOG09160277	Aedes aegypti	7159:003491	AAEL014070	23	3	26	27	29	0.8318	Q16HD1	vacuolar protein sorting
EOG091607N9	Aedes aegypti	7159:001961	AAEL006779	26	0	26	27	26	0.8318	Q174W6	Transmembrane:Helical
EOG091609BB	Aedes aegypti	7159:002d92	AAEL012181	23	1	24	27	25	0.8318	Q16MV0	Akirin
EOG091607OG	Aedes aegypti	7159:000f33	AAEL004052	27	0	27	27	27	0.8319	Q17DT2	Similarity:Contains CTLH domain.
EOG091607MM	Aedes aegypti	7159:003961	AAEL015542	15	1	16	27	17	0.832	Q1DGP7	Potassium channel, voltage dependent, KCNQ1
EOG0916027T	Aedes aegypti	7159:001717	AAEL006169	27	0	27	27	27	0.8321	Q03168	Lysosomal aspartic protease
EOG091604SL	Aedes aegypti	7159:0033e1	Gnpda1	13	14	27	27	42	0.8321	Q16HW7	Glucosamine-6-phosphate deaminase
EOG091604SL	Aedes aegypti	7159:0033e3	AAEL013879	13	14	27	27	42	0.8321	Q16HW6	Transmembrane:Helical
EOG091607JL	Aedes aegypti	7159:00272f	AAEL010467	27	0	27	27	27	0.8321	Q16SW8	heterogeneous nuclear ribonucleoprotein
EOG0916053C	Aedes aegypti	7159:002cef	AAEL012014	24	2	26	27	28	0.8322	Q16ND1	L-lactate dehydrogenase
EOG09160H04	Aedes aegypti	7159:002a3e	AAEL011290	2	0	2	27	2	0.8322	Q16QH2	NA
EOG091601GM	Aedes aegypti	7159:001119	AAEL004567	24	1	25	27	26	0.8323	Q17CH3	Similarity:Contains 1 PH domain.
EOG0916085Y	Aedes aegypti	7159:001fbb	RpL18	16	1	17	27	18	0.8323	Q1HR62	60S ribosomal protein L18
EOG091603UE	Aedes aegypti	7159:002f0a	AAEL012579	26	0	26	27	26	0.8324	Q16LN3	Aspartate aminotransferase
EOG091608N7	Aedes aegypti	7159:00108f	AAEL004427	25	0	25	27	25	0.8324	Q17CV4	prefoldin subunit
EOG091601MY	Aedes aegypti	7159:0005db	AAEL001588	24	1	25	27	26	0.8325	Q17KV3	glutamate carboxypeptidase
EOG091604CP	Aedes aegypti	7159:002e75	AAEL012417	11	16	27	27	43	0.8325	Q16M60	Transmembrane:Helical
EOG091604CP	Aedes aegypti	7159:002e77	AAEL012419	11	16	27	27	43	0.8325	Q16M56	Similarity:Contains PCI domain.
EOG09160ALP	Aedes aegypti	7159:001e8f	AAEL008170	22	1	23	27	24	0.8325	Q16ZK6	Biogenesis of lysosome-related organelles complex 1 subunit 1
EOG091601RR	Aedes aegypti	7159:002a52	AAEL011310	25	0	25	27	25	0.8326	Q16QE0	axonemal dynein intermediate chain polypeptide
EOG0916015F	Aedes aegypti	7159:002b6d	AAEL011603	27	0	27	27	27	0.8327	Q16PL8	DNA topoisomerase
EOG091607WX	Aedes aegypti	7159:003bfe	AAEL017532	20	0	20	27	20	0.8328	NA	NA
EOG091601RO	Aedes aegypti	7159:000e13	AAEL003757	7	20	27	27	47	0.8329	Q0IG14	Glutamate dehydrogenase
EOG091601RO	Aedes aegypti	7159:00272c	AAEL010464;GDH	7	20	27	27	47	0.8329	Q16SW1	Similarity:Belongs to the Glu/Leu/Phe/Val dehydrogenases family.
EOG091608XK	Aedes aegypti	7159:0002d6	AAEL000782	27	0	27	27	27	0.8329	Q17N90	Nucleoporin, NSP1-like, C-terminal
EOG091600SN	Aedes aegypti	7159:002027	AAEL008592	27	0	27	27	27	0.833	Q16YA9	ribonuclease iii
EOG091601DL	Aedes aegypti	7159:002924	AAEL010991	24	1	25	27	26	0.833	Q16RD8	Transmembrane:Helical
EOG091601MF	Aedes aegypti	7159:000d00	AAEL003476	26	0	26	27	26	0.833	Q17FB6	calpain-c
EOG091603FT	Aedes aegypti	7159:000f3d	AAEL004063	27	0	27	27	27	0.833	Q17DU2	WD-repeat protein
EOG0916066H	Aedes aegypti	7159:002fb8	AAEL012764	24	2	26	27	28	0.833	Q16L48	Region:S-adenosyl-L-methionine binding
EOG091608AX	Aedes aegypti	7159:0034f2	AAEL014179	19	1	20	27	21	0.833	Q16H17	PH domain-like
EOG09160AW7	Aedes aegypti	7159:000d64	AAEL003578	11	14	25	27	39	0.833	Q17F27	out at first protein
EOG09160AW7	Aedes aegypti	7159:003582	AAEL014326	11	14	25	27	39	0.833	Q16GM9	out at first protein
EOG091601V4	Aedes aegypti	7159:003477	AAEL014044	26	1	27	27	28	0.8331	Q16HF5	Transmembrane:Helical
EOG0916049Q	Aedes aegypti	7159:0003ca	AAEL001038	21	0	21	27	21	0.8332	Q17MG8	cak1
EOG091606YA	Aedes aegypti	7159:002cdc	AAEL011995	25	0	25	27	25	0.8332	Q16NF4	Transmembrane:Helical
EOG091601I9	Aedes aegypti	7159:00336c	AAEL013755	22	4	26	27	30	0.8333	Q16I98	Similarity:Contains protein kinase domain.
EOG091605HE	Aedes aegypti	7159:000f85	AAEL004141	22	1	23	27	24	0.8333	Q17DK4	phosphatidylinositol transfer protein/retinal degeneration b protein
EOG0916087P	Aedes aegypti	7159:002205	AAEL009099	25	0	25	27	25	0.8333	Q16WT5	uridine cytidine kinase i
EOG091604C2	Aedes aegypti	7159:002880	AAEL010814	27	0	27	27	27	0.8334	Q0IEC8	Similarity:Belongs to the isocitrate and isopropylmalate dehydrogenases family.
EOG0916051V	Aedes aegypti	7159:003047	AAEL012912	26	1	27	27	28	0.8334	Q16KQ4	Transmembrane:Helical
EOG091601X6	Aedes aegypti	7159:001c51	AAEL007575	27	0	27	27	27	0.8335	Q171N5	NA
EOG091603B9	Aedes aegypti	7159:002051	CYP49A1	25	0	25	27	25	0.8335	Q16Y74	Similarity:Belongs to the cytochrome P450 family.
EOG091604QY	Aedes aegypti	7159:00191c	AAEL006710	25	1	26	27	27	0.8335	Q175B9	nucleolysin tia-1
EOG091601OU	Aedes aegypti	7159:001280	AAEL004936	25	1	26	27	27	0.8336	Q17BK6	Bicaudal-D protein, microtubule-associated
EOG091605WM	Aedes aegypti	7159:002207	eIF3-S5	25	2	27	27	29	0.8337	Q1HR47	Eukaryotic translation initiation factor 3 subunit 5
EOG091606DR	Aedes aegypti	7159:002895	AAEL010840	26	0	26	27	26	0.8337	Q16RV1	NA
EOG0916099J	Aedes aegypti	7159:00019d	AAEL000445	25	0	25	27	25	0.8337	Q17P92	Single domain Von Willebrand factor type C domain
EOG091601L7	Aedes aegypti	7159:000207	AAEL000558	21	4	25	27	30	0.8338	Q17NZ4	Transmembrane:Helical
EOG091603LM	Aedes aegypti	7159:000d80	AAEL003606	26	1	27	27	28	0.8338	Q17F22	purine biosynthesis protein 6, pur6
EOG091604BP	Aedes aegypti	7159:002c9a	AAEL011924	17	2	19	27	21	0.8338	Q16NN0	Similarity:Belongs to the two pore domain potassium channel (TC 1.A.1.8) family.
EOG0916096F	Aedes aegypti	7159:003102	AAEL013106	10	0	10	27	10	0.8338	Q16K61	Fibronectin type III
EOG091605AB	Aedes aegypti	7159:0027f8	AAEL010672	22	2	24	27	26	0.8339	Q16SA3	Transmembrane:Helical
EOG091605AB	Aedes aegypti	7159:002f8c	AAEL012718	22	2	24	27	26	0.8339	Q16L98	Transmembrane:Helical
EOG091606ID	Aedes aegypti	7159:003be7	AAEL017508	19	8	27	27	35	0.8339	NA	NA
EOG091609KU	Aedes aegypti	7159:000195	AAEL000437	16	0	16	27	16	0.8339	Q17P61	Transmembrane:Helical
EOG09160043	Aedes aegypti	7159:0008c4	AAEL002346	21	6	27	27	34	0.834	Q17IK7	Similarity:Contains Sema domain.
EOG091607K8	Aedes aegypti	7159:002a15	AAEL011247	2	25	27	27	73	0.834	Q16QM8	Similarity:Contains 2 LIM zinc-binding domains.
EOG091607K8	Aedes aegypti	7159:00313b	AAEL013168	2	25	27	27	73	0.834	Q16JZ5	Similarity:Contains 2 LIM zinc-binding domains.
EOG091607K8	Aedes aegypti	7159:003374	AAEL013763	2	25	27	27	73	0.834	Q16I82	Similarity:Contains 2 LIM zinc-binding domains.
EOG091607K8	Aedes aegypti	7159:003376	AAEL013765	2	25	27	27	73	0.834	Q16I81	Similarity:Contains 1 LIM zinc-binding domain.
EOG09160BZ4	Aedes aegypti	7159:000737	AAEL001944	18	1	19	27	20	0.834	Q16NK9	Transmembrane:Helical
EOG09160BZ4	Aedes aegypti	7159:002ca7	AAEL011938	18	1	19	27	20	0.834	Q16NK9	Transmembrane:Helical
EOG091600OU	Aedes aegypti	7159:002aba	AAEL011417	27	0	27	27	27	0.8341	Q0IEC5	synaptojanin
EOG0916048S	Aedes aegypti	7159:001c3d	AAEL007555	22	5	27	27	32	0.8341	Q171S4	Similarity:Belongs to the acyl-CoA dehydrogenase family.
EOG09160948	Aedes aegypti	7159:002a80	AAEL011357	24	0	24	27	24	0.8341	Q16Q91	maintenance of killer 16 (mak16) protein
EOG091600HL	Aedes aegypti	7159:001927	AAEL006721	23	3	26	27	29	0.8342	Q175A3	2-oxoglutarate dehydrogenase
EOG091600NV	Aedes aegypti	7159:0016c5	AAEL006085	26	1	27	27	28	0.8342	Q177P7	methylenetetrahydrofolate dehydrogenase
EOG09160324	Aedes aegypti	7159:0019b0	AAEL006866	27	0	27	27	27	0.8342	Q174L3	Similarity:Contains 5 LIM zinc-binding domains.
EOG091609HQ	Aedes aegypti	7159:002f58	AAEL012662	22	0	22	27	22	0.8342	Q16LF5	Similarity:Contains 1 basic helix-loop-helix (bHLH) domain.
EOG09160CPQ	Aedes aegypti	7159:000380	AAEL000958	12	0	12	27	12	0.8342	Q17MQ5	Protein of unknown function DUF4535
EOG091602PI	Aedes aegypti	7159:00080b	AAEL002160	24	3	27	27	30	0.8343	Q17J37	Obg-like ATPase 1
EOG091603YF	Aedes aegypti	7159:00280b	AAEL010691	25	1	26	27	27	0.8343	Q95VP8	ribonucleoside-diphosphate reductase small chain
EOG091606JA	Aedes aegypti	7159:002de3	AAEL012264	22	3	25	27	28	0.8344	Q16ML4	Similarity:Belongs to the ribosomal protein L24P family.
EOG09160B9L	Aedes aegypti	7159:00029f	MED11	26	0	26	27	26	0.8344	Q17NH9	Mediator complex subunit 11
EOG0916025S	Aedes aegypti	7159:003626	AAEL014520	24	2	26	27	28	0.8346	Q16G53	follistatin
EOG091607LW	Aedes aegypti	7159:000870	AAEL002261	21	4	25	27	29	0.8346	Q17IQ8	GTP cyclohydrolase i
EOG091607YH	Aedes aegypti	7159:003426	AAEL013963	25	0	25	27	25	0.8346	Q16HN3	tumor necrosis factor induced protein
EOG09160B8P	Aedes aegypti	7159:0006e8	AAEL001865	26	0	26	27	26	0.8346	Q17JZ6	NADH-ubiquinone oxidoreductase, subunit 10
EOG091602UE	Aedes aegypti	7159:002066	AAEL008662	18	7	25	27	32	0.8347	Q16Y61	mixed-lineage leukemia protein
EOG091605JU	Aedes aegypti	7159:001e5d	AAEL008120	23	0	23	27	23	0.8348	Q16ZP1	2'-O-ribose RNA methyltransferase TRM7 homolog
EOG091605SI	Aedes aegypti	7159:001b08	AAEL007235	24	1	25	27	26	0.8348	Q172X4	Similarity:Belongs to the mitochondrial carrier (TC 2.A.29) family.
EOG091609XQ	Aedes aegypti	7159:000cdb	PrBP	22	0	22	27	22	0.8348	Q17FF6	Probable cGMP 3',5'-cyclic phosphodiesterase subunit delta
EOG091606CJ	Aedes aegypti	7159:0016c0	AAEL006080	27	0	27	27	27	0.8349	Q177M5	Similarity:Belongs to the RecA family.
EOG0916028M	Aedes aegypti	7159:000993	AAEL002558	5	0	5	27	5	0.835	Q17HV8	myomesin
EOG091603FD	Aedes aegypti	7159:0020e6	AAEL008793	25	0	25	27	25	0.835	Q16XR9	Uncharacterised protein family UPF0183
EOG091603M7	Aedes aegypti	7159:0012f1	AAEL005052	22	1	23	27	24	0.835	Q17B45	Function:Tubulin is the major constituent of microtubules. It binds two moles of GTP, one at an exchangeable site on the beta chain and one at a non-exchangeable site on the alpha chain.
EOG091603M7	Aedes aegypti	7159:00130f	AAEL005084	22	1	23	27	24	0.835	Q17B47	tubulin beta chain
EOG0916034L	Aedes aegypti	7159:00330e	AAEL013642	25	1	26	27	27	0.8351	Q16IJ3	Similarity:Belongs to the acyl-CoA dehydrogenase family.
EOG0916034L	Aedes aegypti	7159:003720	AAEL014797	25	1	26	27	27	0.8351	Q16FF1	Similarity:Belongs to the acyl-CoA dehydrogenase family.
EOG0916040S	Aedes aegypti	7159:000076	AAEL000123	21	2	23	27	25	0.8351	Q17Q61	Fibronectin type III
EOG091607CV	Aedes aegypti	7159:000cea	AAEL003453	24	0	24	27	24	0.8351	Q17FB4	failed axon connections protein, putative
EOG091609VK	Aedes aegypti	7159:0034ec	AAEL014173	15	3	18	27	21	0.8352	Q16H30	Similarity:Contains F-BAR domain.
EOG091608XP	Aedes aegypti	7159:000379	AAEL000951	24	1	25	27	26	0.8353	Q17MM4	Similarity:Belongs to the EF-1-beta/EF-1-delta family.
EOG0916044W	Aedes aegypti	7159:002cfb	AAEL012026	23	2	25	27	27	0.8354	Q1HR52	translation initiation factor 5C
EOG0916044W	Aedes aegypti	7159:00394a	AAEL015512	23	2	25	27	27	0.8354	Q1DGS2	translation initiation factor 5C, putative
EOG0916005N	Aedes aegypti	7159:001323	AAEL005104	24	2	26	27	28	0.8355	Q17B06	WD40 repeat
EOG0916005N	Aedes aegypti	7159:001354	AAEL005155	24	2	26	27	28	0.8355	Q17AW7	WD40 repeat
EOG091602JU	Aedes aegypti	7159:0003b2	AAEL001014	27	0	27	27	27	0.8355	Q17MG1	vacuolar protein sorting-associated
EOG091603SD	Aedes aegypti	7159:001012	AAEL004294	27	0	27	27	27	0.8355	Q17DA3	Acetyltransferase component of pyruvate dehydrogenase complex
EOG091601LD	Aedes aegypti	7159:0023a7	AAEL009535	25	2	27	27	30	0.8357	Q16VL1	AMP deaminase
EOG091601LD	Aedes aegypti	7159:0038fe	AAEL015410	25	2	27	27	30	0.8357	Q1DGZ2	AMP deaminase
EOG091606GI	Aedes aegypti	7159:003449	AAEL013998	23	1	24	27	26	0.8357	Q16HK5	Transcription initiation factor IIF subunit beta
EOG091603J0	Aedes aegypti	7159:002a61	AAEL011326	7	20	27	27	47	0.8358	Q16QC4	Rab-GTPase-TBC domain
EOG091603J0	Aedes aegypti	7159:00362e	AAEL014528	7	20	27	27	47	0.8358	Q16G43	nuclear protein skip
EOG091609A9	Aedes aegypti	7159:00046f	AAEL001207	20	0	20	27	20	0.8358	Q17LX6	Similarity:Contains 2 LIM zinc-binding domains.
EOG09160CTX	Aedes aegypti	7159:00166e	AAEL005996	8	0	8	27	8	0.8359	Q177X7	NA
EOG091604K8	Aedes aegypti	7159:001556	AAEL005701	27	0	27	27	27	0.8361	Q179C5	Similarity:Contains CRAL-TRIO domain.
EOG0916053H	Aedes aegypti	7159:000a2f	AAEL002716	20	1	21	27	22	0.8361	Q17HB8	Arrestin, C-terminal
EOG0916077Y	Aedes aegypti	7159:000a75	AAEL002789	22	2	24	27	26	0.8361	Q1HQV1	26S proteasome non-ATPase regulatory subunit
EOG091609YI	Aedes aegypti	7159:0013dd	AAEL005298	26	0	26	27	26	0.8361	Q17AI5	NA
EOG0916018X	Aedes aegypti	7159:0012a6	AAEL004977	24	2	26	27	28	0.8362	Q17BF4	Sec24B protein, putative
EOG091601A7	Aedes aegypti	7159:001491	AAEL005491	23	2	25	27	27	0.8362	Q179W7	Similarity:Belongs to the ABC transporter superfamily.
EOG091602YS	Aedes aegypti	7159:0034e0	AAEL014161	26	0	26	27	26	0.8362	Q16H52	Transmembrane:Helical
EOG0916076M	Aedes aegypti	7159:00199e	AAEL006847	26	0	26	27	26	0.8362	Q174N9	Defective in cullin neddylation protein
EOG0916024R	Aedes aegypti	7159:0006ea	AAEL001867	27	0	27	27	27	0.8363	Q17JY9	Transmembrane:Helical
EOG09160301	Aedes aegypti	7159:00145d	AAEL005435	12	12	24	27	37	0.8363	Q17A09	Similarity:Belongs to the peptidase M16 family.
EOG0916027P	Aedes aegypti	7159:003cef	AAEL018190	25	1	26	27	27	0.8364	NA	NA
EOG09160BG1	Aedes aegypti	7159:002f3b	AAEL012633	19	0	19	27	19	0.8364	Q16LI5	Low-density lipoprotein (LDL) receptor class A, conserved site
EOG091600JB	Aedes aegypti	7159:000484	AAEL001231	24	2	26	27	28	0.8365	Q17LV5	Similarity:Contains 1 disintegrin domain.
EOG091601NQ	Aedes aegypti	7159:0013c9	AAEL005278	25	1	26	27	27	0.8365	Q17AJ1	Transporter
EOG09160331	Aedes aegypti	7159:00228e	AAEL009241	26	1	27	27	28	0.8365	Q16WE5	translation initiation factor if-2
EOG091603OF	Aedes aegypti	7159:00118e	AAEL004688	26	1	27	27	29	0.8365	Q0IFM0	Transmembrane:Helical
EOG091604TD	Aedes aegypti	7159:00055d	AAEL001458	23	3	26	27	29	0.8365	Q17L54	heparan sulphate sulfotransferase
EOG091605TZ	Aedes aegypti	7159:001747	AAEL006219	25	0	25	27	25	0.8365	Q176Y4	heparan sulphate 2-o-sulfotransferase
EOG091608OP	Aedes aegypti	7159:00309a	AAEL012996	27	0	27	27	27	0.8365	Q1HQJ5	rho guanine dissociation factor
EOG091601S7	Aedes aegypti	7159:0006ec	AAEL001869	27	0	27	27	27	0.8366	Q17JX5	gmp synthase
EOG091601YU	Aedes aegypti	7159:002d7b	AAEL012158	18	0	18	27	18	0.8367	Q16MY0	WD repeat-containing protein 48 homolog
EOG091604J0	Aedes aegypti	7159:000a9e	AAEL002833	24	0	24	27	24	0.8368	Q17H05	Similarity:Belongs to the peptidase C1 family.
EOG09160ADP	Aedes aegypti	7159:000ab7	AAEL002860	25	0	25	27	25	0.837	Q17GV8	Transmembrane:Helical
EOG09160BDO	Aedes aegypti	7159:002f19	AAEL012596	10	7	17	27	24	0.837	Q16LN1	Transmembrane:Helical
EOG091608UG	Aedes aegypti	7159:00063b	AAEL001684	23	1	24	27	25	0.8371	Q17KH6	boule protein, putative
EOG091604EK	Aedes aegypti	7159:002a19	AAEL011251	25	0	25	27	25	0.8372	Q16QK7	Similarity:Contains RRM (RNA recognition motif) domain.
EOG091609XN	Aedes aegypti	7159:002cf8	AAEL012023	21	0	21	27	21	0.8372	Q16NC0	Ubiquitin ligase, Det1/DDB1-complexing
EOG091603I2	Aedes aegypti	7159:00118b	AAEL004685	12	0	12	27	12	0.8373	Q0IFJ8	Similarity:Belongs to the aldehyde dehydrogenase family.
EOG0916055Z	Aedes aegypti	7159:000a5e	AAEL002765	25	2	27	27	29	0.8373	Q17H66	Sevenup nuclear receptor
EOG09160554	Aedes aegypti	7159:00122c	AAEL004852	27	0	27	27	27	0.8374	Q0IFH6	BTB/POZ domain
EOG091606WS	Aedes aegypti	7159:00317f	AAEL013236	22	0	22	27	22	0.8374	Q16JS7	Proteasome subunit beta type
EOG091600QY	Aedes aegypti	7159:002604	AAEL010159	26	1	27	27	28	0.8375	Q16TN4	importin beta-3
EOG09160BC0	Aedes aegypti	7159:00113d	AAEL004603	22	0	22	27	22	0.8375	Q17C90	Transmembrane:Helical
EOG091601TU	Aedes aegypti	7159:0003ed	AAEL001073	22	2	24	27	26	0.8376	Q17M98	Malic enzyme
EOG091601TU	Aedes aegypti	7159:0003ff	AAEL001091	22	2	24	27	26	0.8376	Q17M99	Malic enzyme
EOG091602MD	Aedes aegypti	7159:002aed	AAEL011470	27	0	27	27	27	0.8376	Q16PZ8	Transmembrane:Helical
EOG091601EE	Aedes aegypti	7159:0008d0	AAEL002358	23	2	25	27	27	0.8377	Q17IG4	Armadillo-like helical
EOG091601EE	Aedes aegypti	7159:001a7f	AAEL007083	23	2	25	27	27	0.8377	Q0IF32	Armadillo
EOG091601F8	Aedes aegypti	7159:00363e	AAEL014544	22	3	25	27	29	0.8377	Q16G28	prophenoloxidase
EOG09160FOO	Aedes aegypti	7159:003b5d	AAEL017367	2	0	2	27	2	0.8377	NA	NA
EOG091604IQ	Aedes aegypti	7159:0014cc	AAEL005552	26	0	26	27	26	0.8378	Q179P9	Succinyl-CoA ligase subunit beta
EOG09160A1J	Aedes aegypti	7159:002086	AAEL008694	14	12	26	27	38	0.8378	Q16Y22	Similarity:Contains homeobox DNA-binding domain.
EOG09160A1J	Aedes aegypti	7159:00371a	AAEL014791	14	12	26	27	38	0.8378	Q16FF4	Similarity:Contains 1 LIM zinc-binding domain.
EOG091603WP	Aedes aegypti	7159:002167	AAEL008932	14	0	14	27	14	0.838	Q16XB5	Similarity:Belongs to the inward rectifier-type potassium channel (TC 1.A.2.1) family.
EOG091605J5	Aedes aegypti	7159:002844	AAEL010751	18	2	20	27	22	0.838	Q0IEF8	methylenetetrahydrofolate dehydrogenase
EOG091605J5	Aedes aegypti	7159:003760	AAEL014871	18	2	20	27	22	0.838	Q16F77	methylenetetrahydrofolate dehydrogenase
EOG09160175	Aedes aegypti	7159:001ece	AAEL008233	16	11	27	27	40	0.8381	Q16ZC9	Transmembrane:Helical
EOG09160175	Aedes aegypti	7159:001ed1	AAEL008236	16	11	27	27	40	0.8381	Q16ZD1	sidestep protein
EOG091603YS	Aedes aegypti	7159:0018de	AAEL006646	26	1	27	27	28	0.8381	Q175H6	Root UVB sensitive family
EOG091608LE	Aedes aegypti	7159:0036bb	AAEL014673	26	1	27	27	28	0.8381	Q16FQ4	NADH:ubiquinone dehydrogenase, putative
EOG091608LE	Aedes aegypti	7159:003772	AAEL014889	26	1	27	27	28	0.8381	Q1HQI1	NADH:ubiquinone dehydrogenase, putative
EOG09160AAE	Aedes aegypti	7159:002b9c	AAEL011656	26	0	26	27	26	0.8381	Q16PF7	Similarity:Belongs to the ribosomal protein S19P family.
EOG0916033H	Aedes aegypti	7159:000963	AAEL002509	15	0	15	27	15	0.8382	Q17HY8	glutamate receptor, ionotropic kainate 1, 2, 3 (glur5, glur6, glur7)
EOG091601EH	Aedes aegypti	7159:0009ea	AAEL002647	24	1	25	27	26	0.8383	Q17HL0	steroid receptor-interacting snf2 domain protein
EOG091602H0	Aedes aegypti	7159:001d4f	AAEL007842	27	0	27	27	27	0.8383	Q170P6	Transmembrane:Helical
EOG091606VR	Aedes aegypti	7159:003c5a	AAEL018031	23	1	24	27	25	0.8383	NA	NA
EOG091609LV	Aedes aegypti	7159:002aaf	AAEL011406	13	1	14	27	15	0.8383	Q16Q43	cytochrome c oxidase polypeptide
EOG091609LV	Aedes aegypti	7159:0037a1	AAEL014944	13	1	14	27	15	0.8383	Q1HRJ0	cytochrome c oxidase polypeptide
EOG09160BZK	Aedes aegypti	7159:000827	AAEL002188	13	0	13	27	13	0.8383	Q17J05	RGS7BP/RGS9BP family
EOG09160BM3	Aedes aegypti	7159:00317b	AAEL013232	22	1	23	27	24	0.8384	Q16JS4	PDZ-binding protein, CRIPT
EOG091600IG	Aedes aegypti	7159:003d3c	AAEL018268	25	2	27	27	29	0.8385	NA	NA
EOG091603IV	Aedes aegypti	7159:001b45	AAEL007298	6	0	6	27	6	0.8385	Q172Q7	Transmembrane:Helical
EOG091604S5	Aedes aegypti	7159:001156	AAEL004630	27	0	27	27	27	0.8385	Q17CA3	G-protein beta WD-40 repeat
EOG091606ZR	Aedes aegypti	7159:0008a9	AAEL002318	26	0	26	27	26	0.8385	Q17IP2	Zinc finger, C4H2-type
EOG091608N4	Aedes aegypti	7159:000eca	AAEL003945	24	3	27	27	30	0.8385	Q0IFW3	transcription initiation factor IIF alpha subunit
EOG09160C0C	Aedes aegypti	7159:001886	AAEL006557	26	0	26	27	26	0.8385	Q175U6	PDCD5-related protein
EOG0916042B	Aedes aegypti	7159:002017	AAEL008575	26	1	27	27	28	0.8387	Q16YE0	regulator of chromosome condensation
EOG0916042B	Aedes aegypti	7159:0033a9	AAEL013819	26	1	27	27	28	0.8387	Q16I30	Bj1 protein, putative
EOG091605QO	Aedes aegypti	7159:00191e	AAEL006712	21	2	23	27	25	0.8387	Q175B8	serine/threonine protein kinase
EOG091605QO	Aedes aegypti	7159:0038ea	AAEL015375	21	2	23	27	25	0.8387	Q16E67	serine/threonine protein kinase
EOG091603GR	Aedes aegypti	7159:002c16	AAEL011784	27	0	27	27	27	0.8388	Q16P34	Similarity:Belongs to the glycosyltransferase 10 family.
EOG091608HY	Aedes aegypti	7159:001c4c	AAEL007570	22	1	23	27	24	0.8388	Q171P8	G protein beta subunit, putative
EOG091608YJ	Aedes aegypti	7159:002632	AAEL010205	24	2	26	27	28	0.8388	Q16TK1	Myofilin
EOG09160BHU	Aedes aegypti	7159:001e65	AAEL008128	19	0	19	27	19	0.8388	Q1HRD0	mitochondrial inner membrane protein translocase, 13kD-subunit, putative
EOG09160C8J	Aedes aegypti	7159:001884	AAEL006555	13	0	13	27	13	0.8388	Q175T7	NA
EOG09160113	Aedes aegypti	7159:001224	AAEL004844	25	1	26	27	27	0.8389	Q0IEP6	Similarity:Contains 2 SH3 domains.
EOG09160113	Aedes aegypti	7159:00223d	AAEL009159	25	1	26	27	27	0.8389	Q0IEP6	Similarity:Contains 2 SH3 domains.
EOG09160525	Aedes aegypti	7159:001ccf	AAEL007708	25	0	25	27	25	0.8389	Q171B6	WD-repeat protein
EOG091607N8	Aedes aegypti	7159:000622	AAEL001659	25	2	27	27	29	0.8389	Q17KK0	misexpression suppressor of ras, putative
EOG09160089	Aedes aegypti	7159:000464	AAEL001196	17	3	20	27	27	0.839	Q17LY6	Function:Cadherins are calcium-dependent cell adhesion proteins.
EOG091601XO	Aedes aegypti	7159:0022fb	AAEL009358	22	1	23	27	24	0.839	Q16W21	Transmembrane:Helical
EOG091601XO	Aedes aegypti	7159:002d5e	AAEL012129	22	1	23	27	24	0.839	Q16N09	Transmembrane:Helical
EOG0916029Z	Aedes aegypti	7159:003a5a	AAEL017098	27	0	27	27	27	0.839	NA	NA
EOG091605I4	Aedes aegypti	7159:0007ac	AAEL002065	19	1	20	27	21	0.8391	Q17JE1	hydroxymethylglutaryl-coa lyase
EOG0916056D	Aedes aegypti	7159:00362c	AAEL014526	25	0	25	27	25	0.8393	Q16G45	Transmembrane:Helical
EOG091602I0	Aedes aegypti	7159:000414	AAEL001113	26	1	27	27	28	0.8394	Q17M55	Transmembrane:Helical
EOG091609WW	Aedes aegypti	7159:000bf7	AAEL003191	23	0	23	27	23	0.8394	Q17G52	Sterile alpha motif domain
EOG09160820	Aedes aegypti	7159:000543	AAEL001428	24	3	27	27	30	0.8395	Q17LB7	Similarity:Contains 1 basic helix-loop-helix (bHLH) domain.
EOG091609SF	Aedes aegypti	7159:0022b3	AAEL009278	22	1	23	27	24	0.8395	Q16WA8	Mitochondrial pyruvate carrier
EOG09160AX1	Aedes aegypti	7159:001215	AAEL004829	23	2	25	27	27	0.8396	Q0IFI1	NADH dehydrogenase, putative
EOG091608WI	Aedes aegypti	7159:001504	AAEL005612	17	0	17	27	17	0.8397	Q179I0	Immunoglobulin I-set
EOG091605NS	Aedes aegypti	7159:000cbf	AAEL003409	27	0	27	27	27	0.8398	Q17FD8	Similarity:Belongs to the ribosomal protein L15P family.
EOG09160B49	Aedes aegypti	7159:00192f	AAEL006729	13	0	13	27	13	0.8398	Q174Y5	Similarity:Contains 1 SH3 domain.
EOG091607X8	Aedes aegypti	7159:000f29	AAEL004042	24	0	24	27	24	0.8399	Q5Q126	Acyl-CoA N-acyltransferase
EOG091604S4	Aedes aegypti	7159:001523	AAEL005646	25	1	26	27	27	0.84	Q179F2	vitellogenin, putative
EOG091606HX	Aedes aegypti	7159:003cff	AAEL018207	26	0	26	27	26	0.84	NA	C-Type lectin (CTL)
EOG091606QI	Aedes aegypti	7159:002ed6	AAEL012523	26	0	26	27	26	0.8401	Q16LU5	transcription factor TFIIH-subunit, putative
EOG09160571	Aedes aegypti	7159:0019a5	AAEL006855	25	0	25	27	25	0.8404	Q174K4	Transmembrane:Helical
EOG091606PM	Aedes aegypti	7159:003174	AAEL013225	24	1	25	27	26	0.8404	Q16JT1	NADH-cytochrome b5 reductase
EOG09160A5G	Aedes aegypti	7159:00173a	AAEL006206	22	2	24	27	26	0.8404	Q176Z7	Similarity:Contains 1 basic helix-loop-helix (bHLH) domain.
EOG09160115	Aedes aegypti	7159:0001c0	AAEL000483	25	1	26	27	27	0.8406	Q17P41	Transmembrane:Helical
EOG091601JJ	Aedes aegypti	7159:001b36	AAEL007283	25	2	27	27	29	0.8406	Q172S4	acetyl-coa synthetase
EOG091603YG	Aedes aegypti	7159:000b7c	AAEL003059	25	0	25	27	25	0.8407	Q0IG78	Rab-GTPase-TBC domain
EOG091607F1	Aedes aegypti	7159:0020d0	AAEL008770	26	0	26	27	26	0.8407	Q16XT2	proteasome subunit beta type
EOG091602MX	Aedes aegypti	7159:000bdb	AAEL003161	27	0	27	27	27	0.8408	Q17G75	IMP--aspartate ligase
EOG091608AD	Aedes aegypti	7159:002033	AAEL008605	24	2	26	27	28	0.8409	Q16YB3	Non-canonical purine NTP pyrophosphatase
EOG09160CPS	Aedes aegypti	7159:0020f9	AAEL008815	13	0	13	27	13	0.8409	Q16XN0	Fatty acyl-CoA reductase
EOG091601HD	Aedes aegypti	7159:000a7b	AAEL002796	15	2	17	27	19	0.841	Q17H26	Region:Substrate binding
EOG091603VD	Aedes aegypti	7159:002983	AAEL011095	27	0	27	27	27	0.8411	Q16R35	Protein-UDP acetylgalactosaminyltransferase
EOG091605UG	Aedes aegypti	7159:00318b	AAEL013248	26	0	26	27	26	0.8412	Q16JQ2	Similarity:Belongs to the cyclin family.
EOG0916005E	Aedes aegypti	7159:00224c	AAEL009175	26	0	26	27	26	0.8413	Q16WM1	slit protein
EOG091600VH	Aedes aegypti	7159:000a37	AAEL002724	25	0	25	27	25	0.8413	Q17HF2	Similarity:Contains 1 C2 domain.
EOG091609JZ	Aedes aegypti	7159:0013d8	GALE8B_b	10	1	11	27	12	0.8414	Q16ND5	Galectin
EOG091609JZ	Aedes aegypti	7159:002ce2	GALE8B_b	10	1	11	27	12	0.8414	Q16ND5	Galectin
EOG0916002F	Aedes aegypti	7159:00174a	AAEL006222	23	4	27	27	32	0.8416	Q176Z3	talin
EOG091601RA	Aedes aegypti	7159:000071	AAEL000118	27	0	27	27	27	0.8416	Q17Q35	cleavage and polyadenylation specificity factor
EOG0916082L	Aedes aegypti	7159:00135b	AAEL005162	25	0	25	27	25	0.8417	Q17AX3	Similarity:Belongs to the ribosomal protein L11P family.
EOG091604N0	Aedes aegypti	7159:003297	AAEL013521	26	1	27	27	28	0.8418	Q16IW5	Similarity:Belongs to the class-I aminoacyl-tRNA synthetase family.
EOG091604N0	Aedes aegypti	7159:00398b	AAEL015601	26	1	27	27	28	0.8418	Q1DGK0	tryptophanyl-tRNA synthetase
EOG0916005J	Aedes aegypti	7159:001204	unc-104	27	0	27	27	27	0.8419	Q17BU3	Kinesin-like protein unc-104
EOG0916022V	Aedes aegypti	7159:0006fa	MED17	26	0	26	27	26	0.8419	Q17JT4	Mediator complex subunit 17
EOG091604EY	Aedes aegypti	7159:000d5b	AAEL003569	24	0	24	27	24	0.8419	Q17F54	acyl-coa thioesterase
EOG091603OW	Aedes aegypti	7159:002e0b	AAEL012306	25	1	26	27	27	0.842	Q16MG4	autophagy related gene
EOG091604B3	Aedes aegypti	7159:002e17	AAEL012318	26	0	26	27	26	0.842	Q16MH0	Similarity:Belongs to the class-II pyridoxal-phosphate-dependent aminotransferase family.
EOG09160BWJ	Aedes aegypti	7159:001950	AAEL006762	16	1	17	27	18	0.8423	Q174W1	Uncharacterised protein family UPF0693
EOG0916052S	Aedes aegypti	7159:001d2d	AAEL007806	23	3	26	27	29	0.8424	Q170T6	Domain of unknown function DUF4205
EOG09160049	Aedes aegypti	7159:002d2f	AAEL012079	22	5	27	27	33	0.8425	Q16N63	Armadillo-like helical
EOG091602GX	Aedes aegypti	7159:003225	CAT1B	26	1	27	27	28	0.8425	Q16J86	Catalase
EOG091603WL	Aedes aegypti	7159:002764	AAEL010522	27	0	27	27	27	0.8425	Q16SQ3	Similarity:Contains JmjC domain.
EOG091605FE	Aedes aegypti	7159:00321a	AAEL013396	26	0	26	27	26	0.8425	Q16JA4	Defective in cullin neddylation protein
EOG0916064Y	Aedes aegypti	7159:0026ca	AAEL010360	25	0	25	27	25	0.8426	Q16T79	Cytosolic Fe-S cluster assembly factor NUBP1 homolog
EOG091602J5	Aedes aegypti	7159:0010c1	AAEL004479	25	1	26	27	27	0.8427	Q17CS3	Transmembrane:Helical
EOG091602M2	Aedes aegypti	7159:0000e2	AAEL000248	26	1	27	27	28	0.8427	Q17PS8	GTP binding protein
EOG091603AM	Aedes aegypti	7159:003179	AAEL013230	22	0	22	27	22	0.8427	Q16JS6	Similarity:Contains MHD (mu homology) domain.
EOG09160A5P	Aedes aegypti	7159:0026c2	AAEL010352	22	0	22	27	22	0.8427	Q16T71	Similarity:Contains PB1 domain.
EOG091606MY	Aedes aegypti	7159:002350	AAEL009448	24	2	26	27	29	0.8428	Q16IF7	SGF29 tudor-like domain
EOG091606MY	Aedes aegypti	7159:002580	AAEL010025	24	2	26	27	29	0.8428	Q16IF7	SGF29 tudor-like domain
EOG091606MY	Aedes aegypti	7159:00332b	AAEL013687	24	2	26	27	29	0.8428	Q16IF7	SGF29 tudor-like domain
EOG091603YX	Aedes aegypti	7159:001de4	AAEL007996	22	2	24	27	26	0.8429	Q0IEU3	Similarity:Contains 2 PH domains.
EOG091606FK	Aedes aegypti	7159:00370d	AAEL014762	19	0	19	27	19	0.8429	Q16FG6	Transmembrane:Helical
EOG091606ZV	Aedes aegypti	7159:002950	AAEL011043	23	0	23	27	23	0.8429	Q16R85	Similarity:Contains chitin-binding type R&R domain.
EOG091608CM	Aedes aegypti	7159:001994	AAEL006836	27	0	27	27	27	0.8429	Q174N0	dihydropteridine reductase
EOG09160C7A	Aedes aegypti	7159:001bd2	AAEL007444	23	1	24	27	25	0.8429	Q172D6	Basic-leucine zipper domain
EOG091600W8	Aedes aegypti	7159:0024df	AAEL009859	26	1	27	27	28	0.843	Q16UL5	Nucleolar GTP-binding protein 1
EOG091604J3	Aedes aegypti	7159:002925	AAEL010993	25	1	26	27	27	0.843	Q16RD6	Queuine tRNA-ribosyltransferase
EOG091604J3	Aedes aegypti	7159:003838	AAEL015117	25	1	26	27	27	0.843	Q16EK7	Queuine tRNA-ribosyltransferase
EOG091605FS	Aedes aegypti	7159:003aa8	AAEL017181	19	8	27	27	35	0.8431	NA	GPCR Muscarinic Acetylcholine Family
EOG091607YO	Aedes aegypti	7159:000e35	AAEL003794	21	2	23	27	25	0.8431	Q17EJ7	Similarity:Contains homeobox DNA-binding domain.
EOG09160876	Aedes aegypti	7159:001f15	AAEL008307	24	0	24	27	24	0.8431	Q16Z51	Haemolymph juvenile hormone binding
EOG091603AU	Aedes aegypti	7159:002289	AAEL009236	11	1	12	27	13	0.8434	Q16WF2	Similarity:Belongs to the glycosyl hydrolase 1 family.
EOG091603AU	Aedes aegypti	7159:0037e9	AAEL015022	11	1	12	27	13	0.8434	Q16ET6	Similarity:Belongs to the glycosyl hydrolase 1 family.
EOG091605BG	Aedes aegypti	7159:00231a	AAEL009389	24	0	24	27	24	0.8434	Q16VW8	Transaldolase
EOG09160807	Aedes aegypti	7159:003d9a	AAEL018668	5	0	5	27	5	0.8435	NA	ATP synthase F0 subunit 6
EOG091609Z8	Aedes aegypti	7159:00316f	AAEL013220	24	0	24	27	24	0.8435	Q16JT0	NA
EOG091601VF	Aedes aegypti	7159:002686	AAEL010292	22	2	24	27	26	0.8436	Q16TB3	Rab-GTPase-TBC domain
EOG091603EC	Aedes aegypti	7159:0010a8	AAEL004453	25	1	26	27	27	0.8437	Q17CR5	DEAD box ATP-dependent RNA helicase
EOG091603EC	Aedes aegypti	7159:0010ba	AAEL004472	25	1	26	27	27	0.8437	Q17CR4	Helicase, C-terminal
EOG091604T9	Aedes aegypti	7159:00269e	AAEL010316	22	1	23	27	24	0.8437	Q0IEI7	Transmembrane:Helical
EOG091600JV	Aedes aegypti	7159:00335c	AAEL013736	25	2	27	27	29	0.8438	Q16IB0	Intron-binding protein aquarius
EOG091604K9	Aedes aegypti	7159:001ce5	AAEL007732	19	2	21	27	23	0.8438	Q171A0	peptidyl-glycine alpha-amidating monooxygenase
EOG091604K9	Aedes aegypti	7159:0035f6	AAEL014450	19	2	21	27	23	0.8438	Q16GA4	peptidyl-glycine alpha-amidating monooxygenase
EOG091605MA	Aedes aegypti	7159:0032a1	AAEL013531	22	1	23	27	24	0.8438	Q16IU9	Similarity:Belongs to the cyclin family.
EOG091607C1	Aedes aegypti	7159:0004a0	MED20	24	0	24	27	24	0.8438	Q17LR9	Mediator complex subunit 20
EOG09160006	Aedes aegypti	7159:0024e9	AAEL009869	20	6	26	27	34	0.8439	Q16UK9	Transmembrane:Helical
EOG091607MK	Aedes aegypti	7159:0022ee	AAEL009342	26	0	26	27	26	0.8439	Q16W42	P-loop containing nucleoside triphosphate hydrolase
EOG091604N8	Aedes aegypti	7159:00308d	king-tubby1	23	4	27	27	31	0.8441	Q16KI5	Protein king tubby 1
EOG091604N8	Aedes aegypti	7159:0032cd	king-tubby2	23	4	27	27	31	0.8441	Q16IR1	Protein king tubby 2
EOG09160306	Aedes aegypti	7159:001977	AAEL006801	27	0	27	27	27	0.8442	Q174T9	Transmembrane:Helical
[truncated: 11,874 more rows]
